# Supplementary material for: Prenatal opioid exposure and subsequent risk of neuropsychiatric disorders in children: nationwide birth cohort study in South Korea
Source: PubMed Central journal article supplement — BMJ. 2024 Apr 24;385:e077664. doi: 10.1136/bmj-2023-077664 (PMC11040462; doi:10.1136/bmj-2023-077664), 2024-04-24
Supplement: kanj077664.ww.pdf [file kanj077664.ww.pdf]

Original article

**Prenatal opioid exposure and subsequent risk of neuropsychiatric disorders in children: a nationwide birth cohort study in South Korea**

Running head: **Prenatal opioid exposure and neuropsychiatric disorders**

Jiseung Kang, postdoctoral researcher<sup>1,2,3¶</sup> Hyeon Jin Kim, senior data scientist and co-principal investigator<sup>4,5¶</sup> Tae Kim, professor<sup>1</sup> Hyeri Lee, doctoral student<sup>4,5</sup> Minji Kim, doctoral student<sup>4,5</sup> Seung Won Lee, professor<sup>6</sup> Min Seo Kim, postdoctoral researcher<sup>7</sup> Ai Koyanagi, professor<sup>8</sup> Lee Smith, professor<sup>9</sup> Guillaume Fond, professor<sup>10</sup> Laurent Boyer, professor<sup>10</sup> Masoud Rahmati, professor<sup>11,12</sup> Guillermo F. López Sánchez, professor<sup>13</sup> Elena Dragioti, professor<sup>14,15</sup> Samuele Cortese, professor<sup>16,17,18,19,20</sup> Jae Il Shin, professor<sup>21\*</sup> Dong Keon Yon, professor and principal investigator<sup>4,5,22\*&</sup>, Marco Solmi, professor<sup>23,24,25,26&</sup>

¶JK and HJK are joint first authors.

\* JIS and DKY contributed equally.

& Senior authors

DKY is a principal investigator.

HJK is a co-principal investigator.

**Corresponding author**

**Dong Keon Yon, MD, PhD, FACAAI, FAAAAI (lead contact)**

Department of Pediatrics, Kyung Hee University College of Medicine, 23 Kyungheedaero, Dongdaemun-gu, Seoul, 02447, South Korea

Tel: +82-2-6935-2476

Fax: +82-504-478-0201

Email: [yonkkang@gmail.com](mailto:yonkkang@gmail.com)

ORCID: 0000-0003-1628-9948

Contents of supplementary appendix

|           |                                                                                                                                                                             |         |
|-----------|-----------------------------------------------------------------------------------------------------------------------------------------------------------------------------|---------|
| Figure S1 | Disposition and study subjects (brief version)                                                                                                                              | p.6     |
| Figure S2 | Study population and propensity score-matched cohort                                                                                                                        | p.7     |
| Figure S3 | Study population and propensity score-matched cohort (cohort A, birth date of infants in 2010-2015)                                                                         | p.8     |
| Figure S4 | Data source and structure of birth cohort                                                                                                                                   | p.9     |
| Figure S5 | Diagram for a specific prescription opioid and the number of prescriptions                                                                                                  | p.10    |
| Figure S6 | Density plot and box plot of 1:5 propensity scores of children with and without opioid exposure from 2010 to 2017                                                           | p.11    |
| Figure S7 | Density plot and box plot of 1:5 propensity scores of children with and without opioid exposure from 2010 to 2015                                                           | p.12    |
| Table S1  | The RECORD statement – checklist of itlancetems, extended from the STROBE statement, that should be reported in observational studies using routinely collected health data | p.13-21 |
| Table S2  | Variable sources and codes used to define exclusion criteria, exposure, outcome of interest, and covariates                                                                 | p.22-25 |
| Table S3  | Study design and participants with excluded criteria                                                                                                                        | p.26    |
| Table S4  | Specific prescription opioid considered and number of prescriptions (n=832,276)                                                                                             | p.27    |

|           |                                                                                                                                                                |         |
|-----------|----------------------------------------------------------------------------------------------------------------------------------------------------------------|---------|
| Table S5  | Maternal health conditions among individuals with opioid prescriptions (total n=216,012)                                                                       | p.28    |
| Table S6  | List of references of validation of ICD-10 code for neuropsychiatric disorders                                                                                 | p.29-33 |
| Table S7  | The representativeness of the participants in the study                                                                                                        | p.34-35 |
| Table S8  | Summary of dataset and cohort                                                                                                                                  | p.36-37 |
| Table S9  | National Health Screening Program for infants and children at 6 months after birth                                                                             | p.38-40 |
| Table S10 | Baseline characteristics of the study subjects in the child screening cohort from 2010 to 2017                                                                 | p.41-42 |
| Table S11 | Baseline characteristics of study subjects (PS-matched cohort B, birth date of infants in 2010-2015)                                                           | p.43-46 |
| Table S12 | Interaction analysis of maternal health condition with opioid prescriptions and opioid prescriptions during pregnancy in PS-matched cohort A from 2010 to 2017 | p.47-48 |
| Table S13 | Interaction analysis of opioid prescriptions in a year before pregnancy and opioid prescriptions during pregnancy                                              | p.49-50 |
| Table S14 | Interaction analysis and ratio of hazard ratio of delivery type and opioid prescriptions during pregnancy in PS-matched cohort A                               | p.51-52 |
| Table S15 | Summary of main outcome in each cohort                                                                                                                         | p.53-55 |
| Table S16 | Hazard ratio models of the association between prenatal opioid exposure during pregnancy and                                                                   | p.56-57 |

|           |                                                                                                                                                                                                                                    |         |
|-----------|------------------------------------------------------------------------------------------------------------------------------------------------------------------------------------------------------------------------------------|---------|
|           | neuropsychiatric disorders in children with the 1:5 PS-matched cohort B (birth date of infants in 2010-2015)                                                                                                                       |         |
| Table S17 | Hazard ratio models of the association between prenatal opioid exposure during pregnancy and neuropsychiatric disorders in children with the 1:5 PS-matched cohort C from 2010 to 2017 ('outcome' criteria with above 1 diagnosis) | p.58-59 |
| Table S18 | Hazard ratio model of the association between prenatal opioid exposure during pregnancy and specific neuropsychiatric disorders in children within the 1:5 PS-matched cohort A from 2010 to 2017                                   | p.60-61 |
| Table S19 | Hazard ratio models of the association between prenatal opioid exposure during pregnancy and neuropsychiatric disorders in children with the full unmatched cohort from 2010 to 2017                                               | p.62-63 |
| Table S20 | Stratification analysis for hazard ratio models of the association between opioid exposure during pregnancy and neuropsychiatric disorders in children with the full unmatched cohort from 2010 to 2017                            | p.64-66 |
| Table S21 | Adjusted hazard ratio models of the dose-dependence between prenatal opioid exposure during pregnancy and specific neuropsychiatric disorders in children within the full unmatched cohort from 2010 to 2017                       | p.67-70 |
| Table S22 | Hazard ratio model of the association between prenatal opioid exposure during pregnancy and specific neuropsychiatric disorders in children within the full unmatched cohort from 2010 to 2017                                     | p.71-72 |
| Table S23 | Hazard ratio models of the association between prenatal opioid exposure during pregnancy and neuropsychiatric disorders in children with the child screening cohort from 2010 to 2017                                              | p.73-74 |

|                        |                                                                                                                                                                                                               |          |
|------------------------|---------------------------------------------------------------------------------------------------------------------------------------------------------------------------------------------------------------|----------|
| Table S24              | Stratification analysis for hazard ratio models of the association between opioid exposure during pregnancy and neuropsychiatric disorders in children with the child screening cohort from 2010 to 2017      | p.75-78  |
| Table S25              | Adjusted hazard ratio models of the dose-dependence between prenatal opioid exposure during pregnancy and specific neuropsychiatric disorders in children within the child screening cohort from 2010 to 2017 | p.79-81  |
| Table S26              | Hazard ratio model of the association between prenatal opioid exposure during pregnancy and specific neuropsychiatric disorders in children within the child screening cohort from 2010 to 2017               | p.82-83  |
| Table S27              | Results of a systematic rapid review reporting trend of prenatal opioid exposure in the study periods (published, 2020-2023)                                                                                  | p.84-88  |
| Supplementary material | Supplementary Methods for Supplementary Data                                                                                                                                                                  | P.89-90  |
| Supplementary material | Supplementary data 1-11                                                                                                                                                                                       | p.91-119 |

**Figure S1.** Disposition and study subjects (brief version)

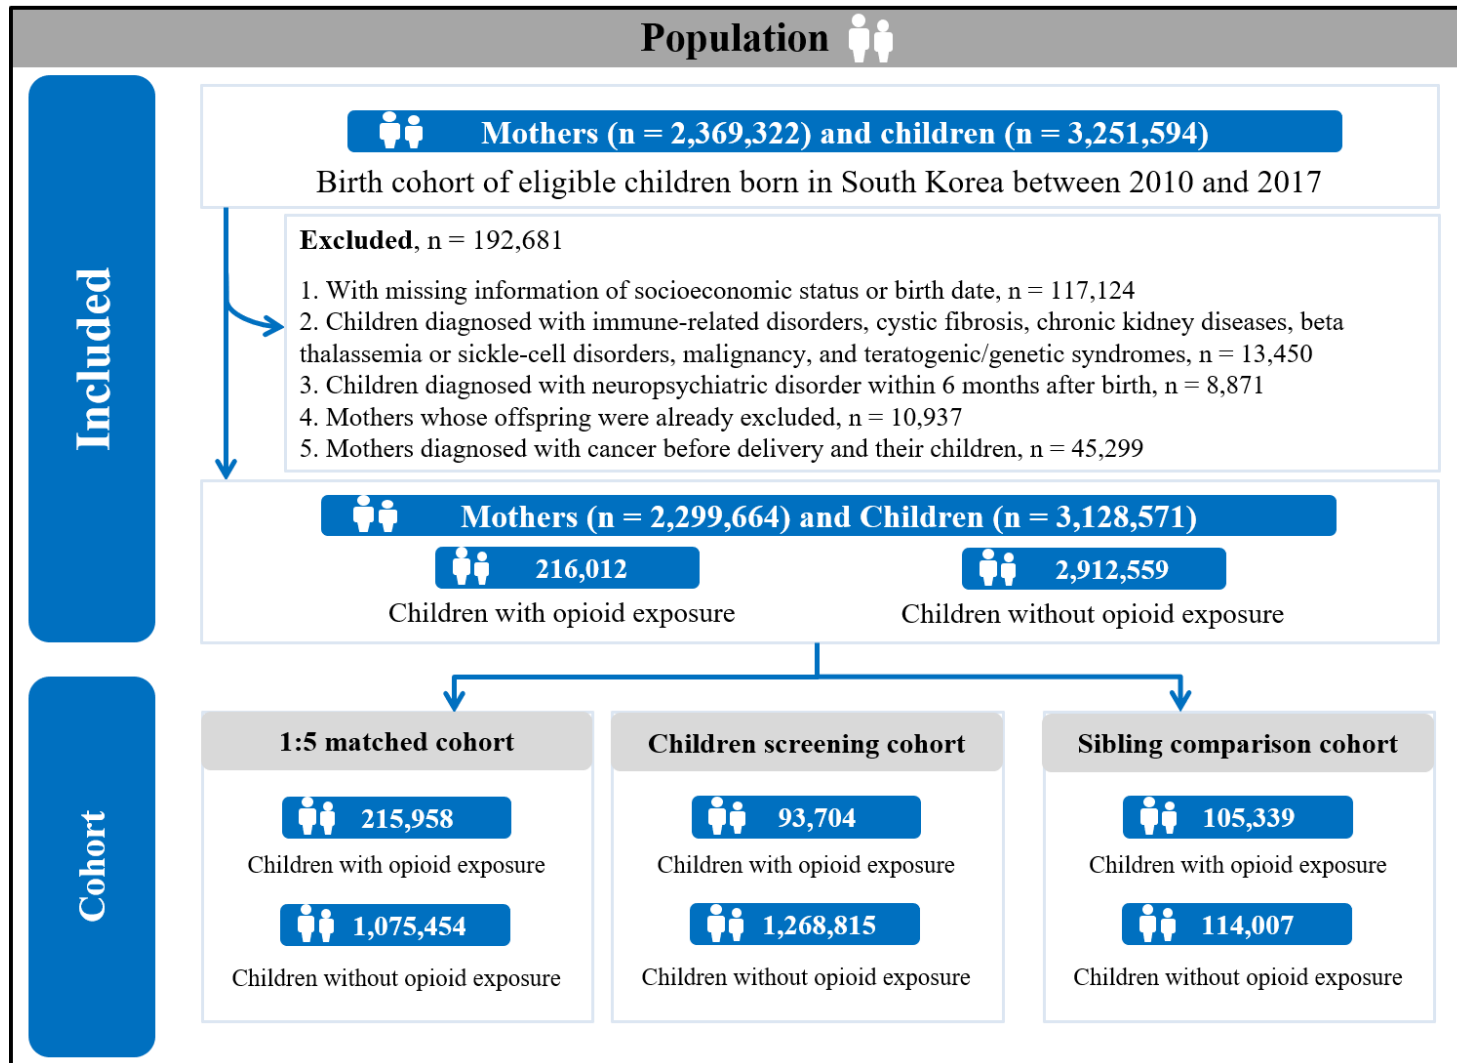

**Figure S2.** Study population and propensity score-matched cohort

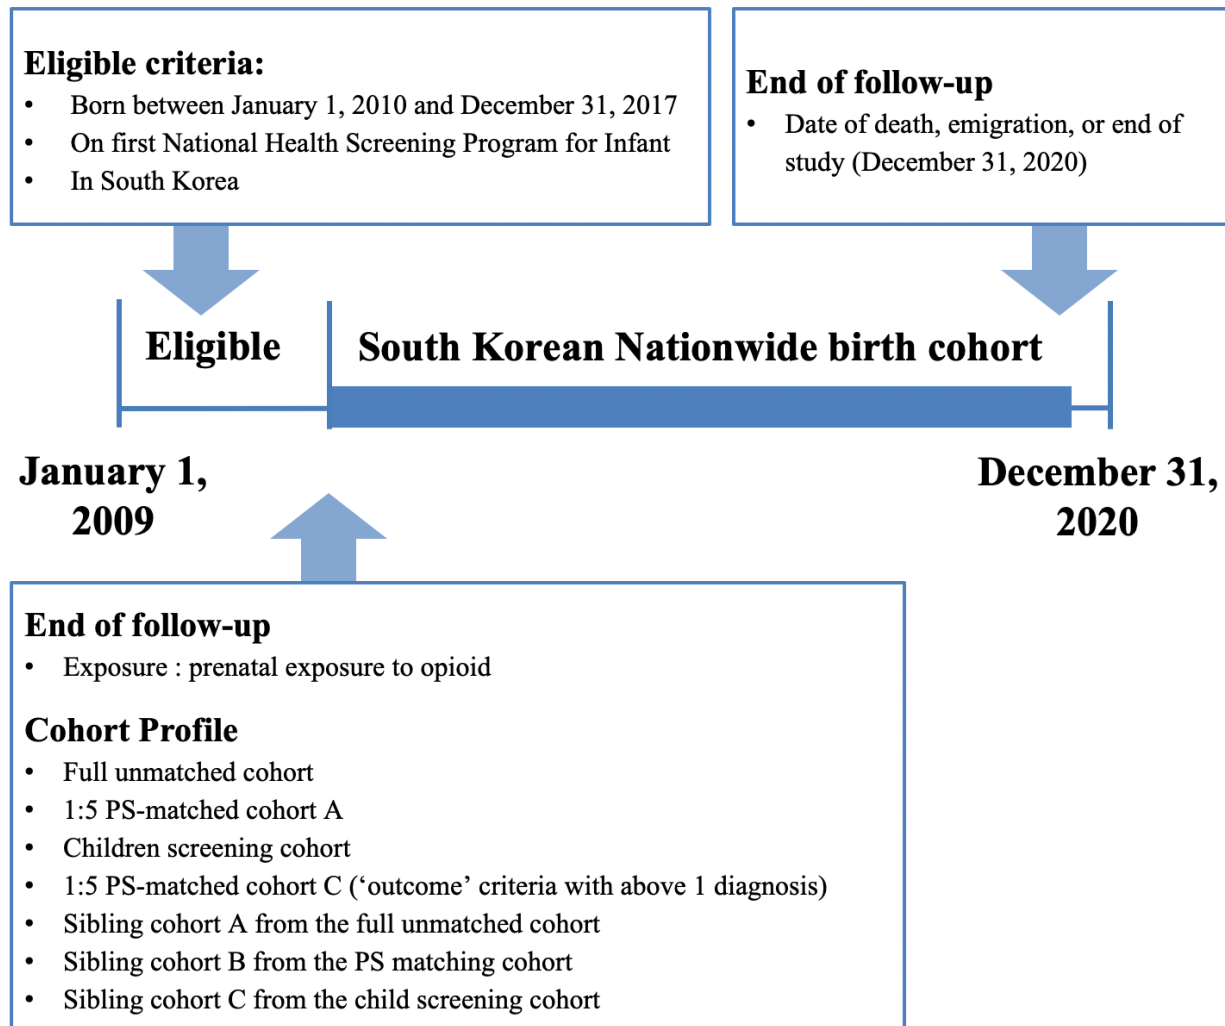

**Figure S3.** Study population and propensity score-matched cohort

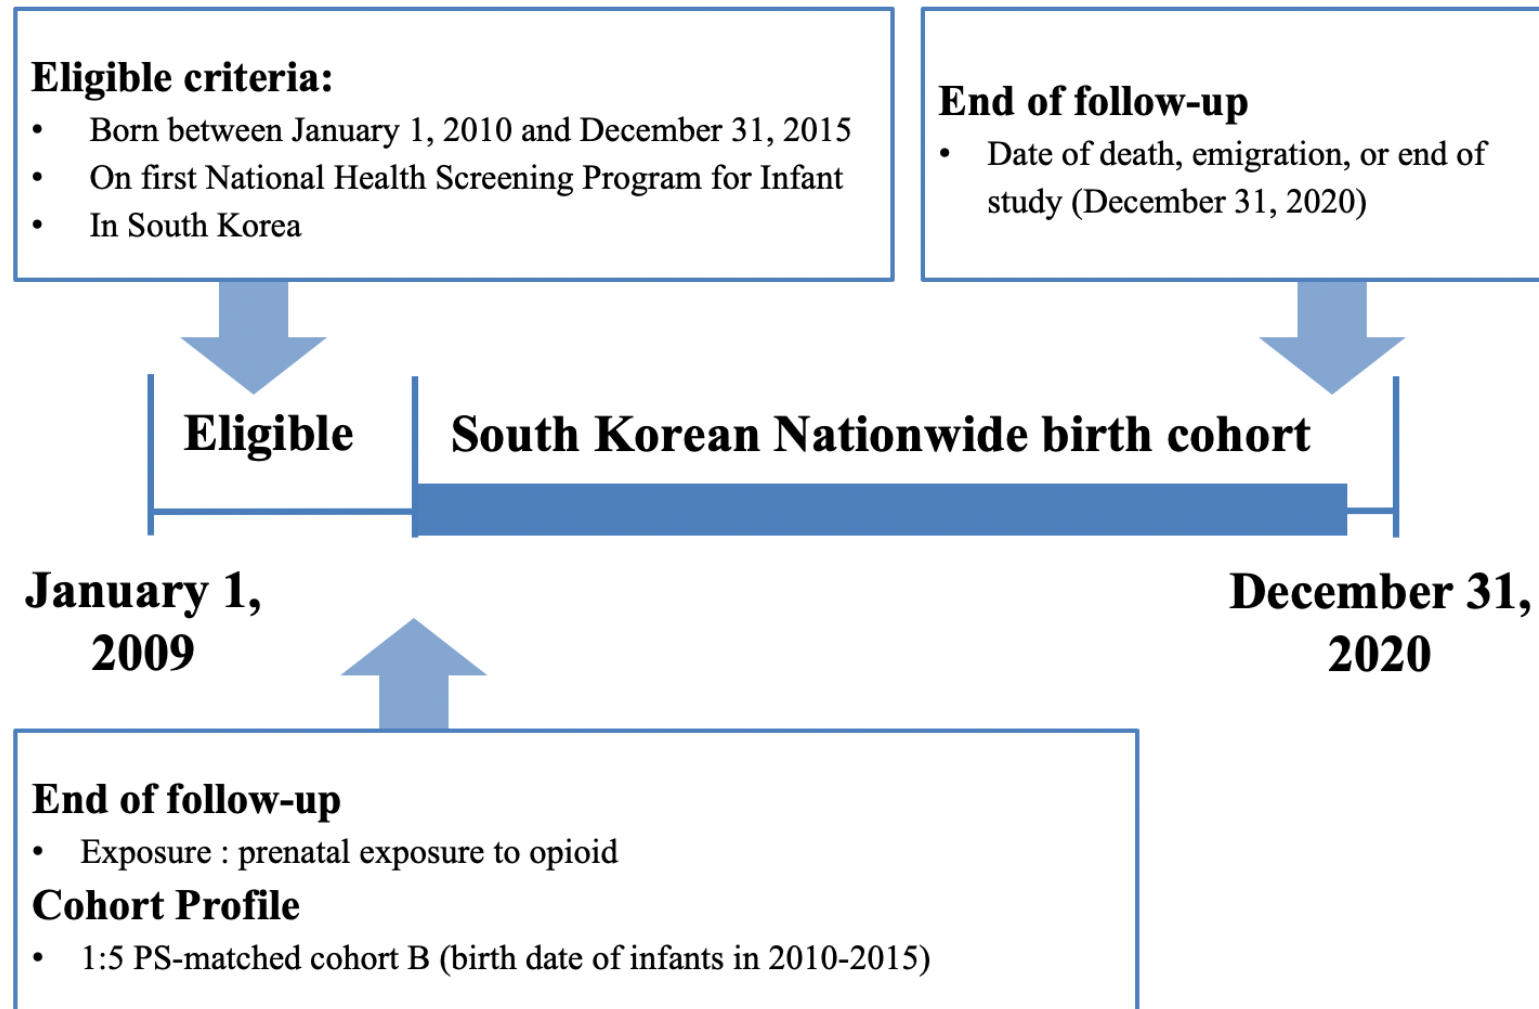



**Figure S4.** Data source and structure of birth cohort

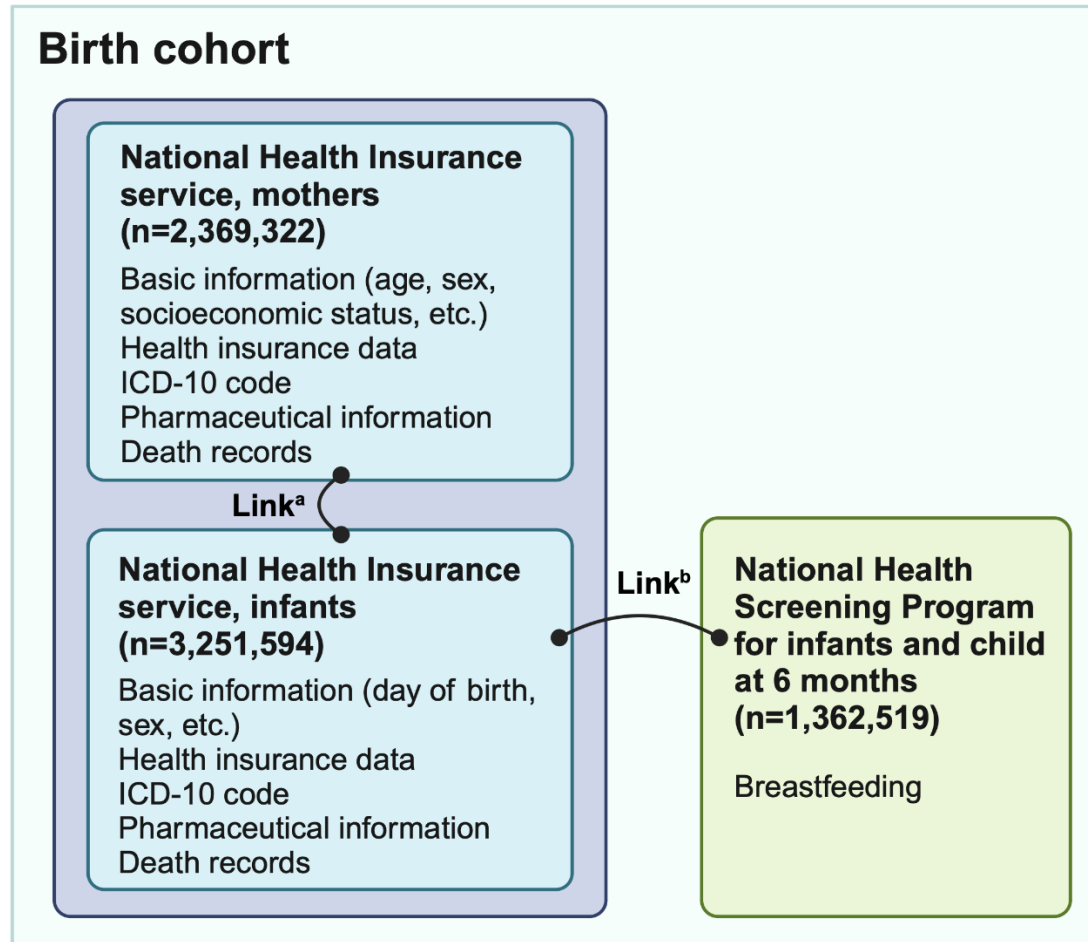

Link<sup>a</sup>: linked by using family insurance identification number from the Korean government

Link<sup>b</sup>: linked by using individual identification number from the Korean government

**Figure S5.** Diagram for a specific prescription opioid and the number of prescriptions

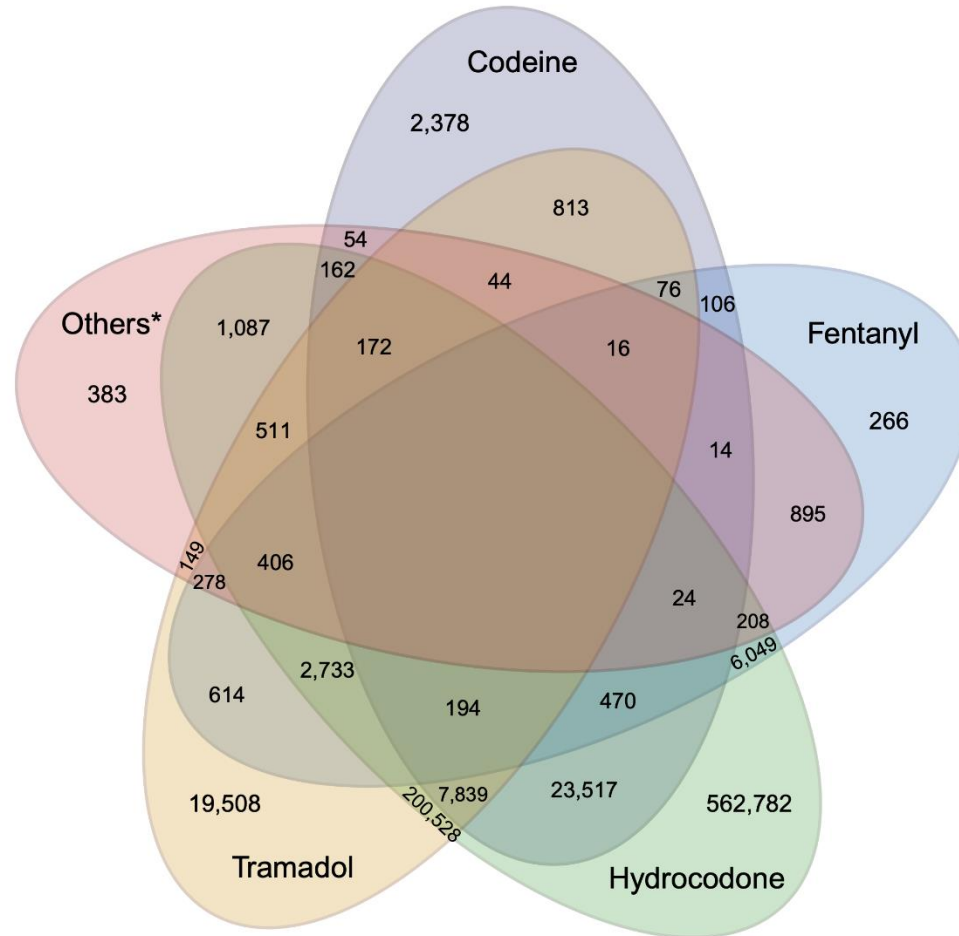

\*Butorphanol, hydromorphone, morphine, oxycodone, tapentadol

**Figure S6.** Density plot and box plot of 1:5 propensity scores of children with and without opioid exposure from 2010 to 2017

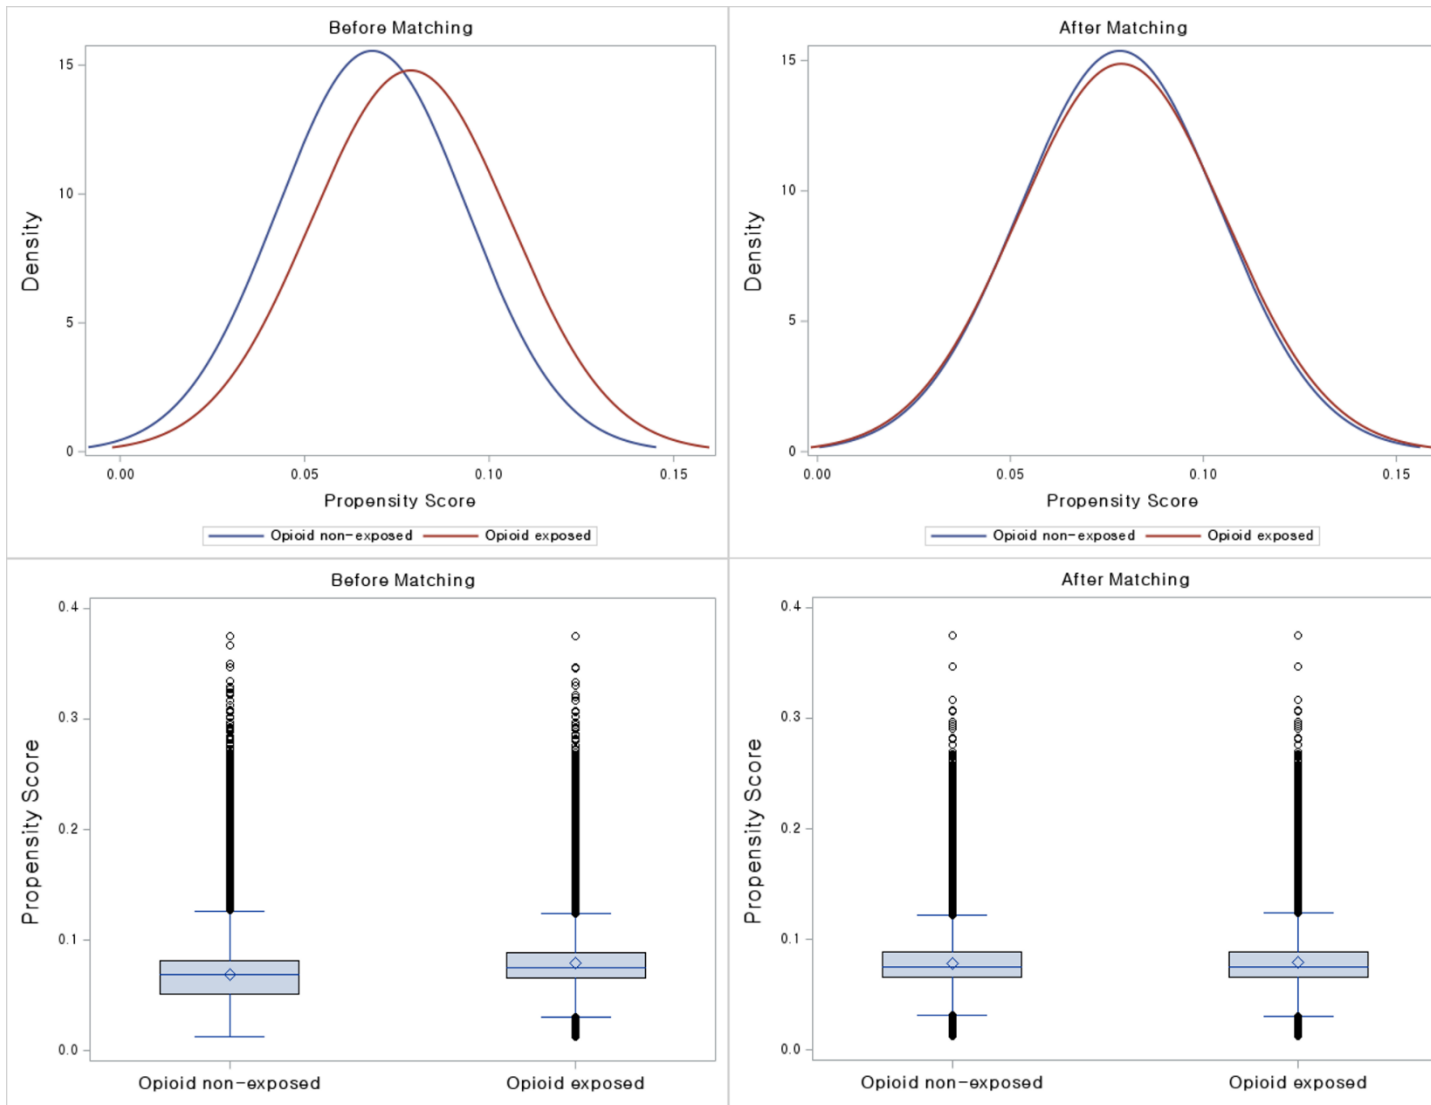

**Figure S7.** Density plot and box plot of 1:5 propensity scores of children with and without opioid exposure from 2010 to 2015

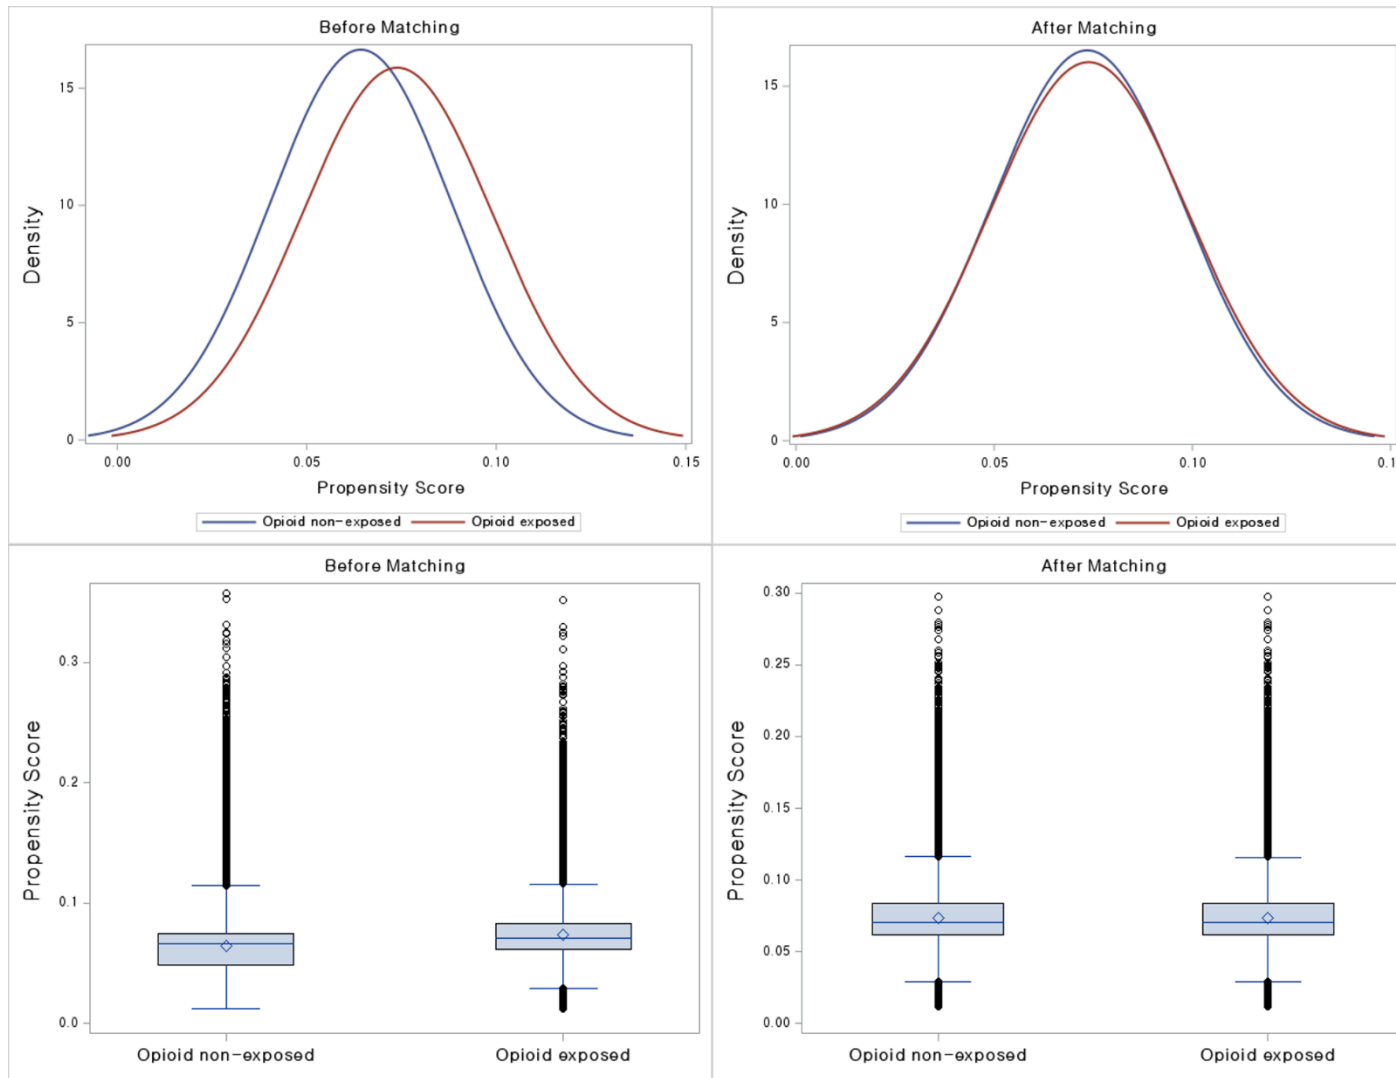

**Table S1.** The RECORD statement – checklist of items, extended from the STROBE statement, that should be reported in observational studies using routinely collected health data

|                           | Item No. | STROBE items                                                                                                                                                                               | RECORD items                                                                                                                                                                                                                                                                                                                                                                                                                                       | Location in manuscript where items are reported |
|---------------------------|----------|--------------------------------------------------------------------------------------------------------------------------------------------------------------------------------------------|----------------------------------------------------------------------------------------------------------------------------------------------------------------------------------------------------------------------------------------------------------------------------------------------------------------------------------------------------------------------------------------------------------------------------------------------------|-------------------------------------------------|
| <b>Title and abstract</b> |          |                                                                                                                                                                                            |                                                                                                                                                                                                                                                                                                                                                                                                                                                    |                                                 |
|                           | 1        | (a) Indicate the study’s design with a commonly used term in the title or the abstract (b) Provide in the abstract an informative and balanced summary of what was done and what was found | <p>RECORD 1.1: The type of data used should be specified in the title or abstract. When possible, the name of the databases used should be included.</p> <p>RECORD 1.2: If applicable, the geographic region and timeframe within which the study took place should be reported in the title or abstract.</p> <p>RECORD 1.3: If linkage between databases was conducted for the study, this should be clearly stated in the title or abstract.</p> | Title Page                                      |
| <b>Introduction</b>       |          |                                                                                                                                                                                            |                                                                                                                                                                                                                                                                                                                                                                                                                                                    |                                                 |
| Background                | 2        | Explain the scientific background and rationale                                                                                                                                            |                                                                                                                                                                                                                                                                                                                                                                                                                                                    | Introduction                                    |

|                |   |                                                                                                                                                                                                                                                                                                                                                                                                                                                                                          |                                                                                                                                                                                                                                                                                                                                                                                                                                                    |                                    |
|----------------|---|------------------------------------------------------------------------------------------------------------------------------------------------------------------------------------------------------------------------------------------------------------------------------------------------------------------------------------------------------------------------------------------------------------------------------------------------------------------------------------------|----------------------------------------------------------------------------------------------------------------------------------------------------------------------------------------------------------------------------------------------------------------------------------------------------------------------------------------------------------------------------------------------------------------------------------------------------|------------------------------------|
| rationale      |   | for the investigation being reported                                                                                                                                                                                                                                                                                                                                                                                                                                                     |                                                                                                                                                                                                                                                                                                                                                                                                                                                    |                                    |
| Objectives     | 3 | State specific objectives, including any prespecified hypotheses                                                                                                                                                                                                                                                                                                                                                                                                                         |                                                                                                                                                                                                                                                                                                                                                                                                                                                    | Introduction                       |
| <b>Methods</b> |   |                                                                                                                                                                                                                                                                                                                                                                                                                                                                                          |                                                                                                                                                                                                                                                                                                                                                                                                                                                    |                                    |
| Study Design   | 4 | Present key elements of study design early in the paper                                                                                                                                                                                                                                                                                                                                                                                                                                  |                                                                                                                                                                                                                                                                                                                                                                                                                                                    | - Nationwide cohort in South Korea |
| Setting        | 5 | Describe the setting, locations, and relevant dates, including periods of recruitment, exposure, follow-up, and data collection                                                                                                                                                                                                                                                                                                                                                          |                                                                                                                                                                                                                                                                                                                                                                                                                                                    | - Nationwide cohort in South Korea |
| Participants   | 6 | <p><i>(a) Cohort study</i> - Give the eligibility criteria, and the sources and methods of selection of participants. Describe methods of follow-up</p> <p><i>Case-control study</i> - Give the eligibility criteria, and the sources and methods of case ascertainment and control selection. Give the rationale for the choice of cases and controls</p> <p><i>Cross-sectional study</i> - Give the eligibility criteria, and the sources and methods of selection of participants</p> | <p>RECORD 6.1: The methods of study population selection (such as codes or algorithms used to identify subjects) should be listed in detail. If this is not possible, an explanation should be provided.</p> <p>RECORD 6.2: If the study involved linkage of databases, consider use of a flow diagram or other graphical display to demonstrate the data linkage process, including the number of individuals with linked data at each stage.</p> | - Nationwide cohort in South Korea |

|                              |   |                                                                                                                                                                                                                                     |                                                                                                                                                                                                                 |                                                                                      |
|------------------------------|---|-------------------------------------------------------------------------------------------------------------------------------------------------------------------------------------------------------------------------------------|-----------------------------------------------------------------------------------------------------------------------------------------------------------------------------------------------------------------|--------------------------------------------------------------------------------------|
|                              |   | <p><i>(b) Cohort study</i> - For matched studies, give matching criteria and number of exposed and unexposed</p> <p><i>Case-control study</i> - For matched studies, give matching criteria and the number of controls per case</p> |                                                                                                                                                                                                                 |                                                                                      |
| Variables                    | 7 | Clearly define all outcomes, exposures, predictors, potential confounders, and effect modifiers. Give diagnostic criteria, if applicable.                                                                                           | RECORD 7.1: A complete list of codes and algorithms used to classify exposures, outcomes, confounders, and effect modifiers should be provided. If these cannot be reported, an explanation should be provided. | <ul style="list-style-type: none"> <li>-Outcomes</li> <li>-Covariates</li> </ul>     |
| Data sources/<br>measurement | 8 | For each variable of interest, give sources of data and details of methods of assessment (measurement).<br><br>Describe comparability of assessment methods if there is more than one group                                         |                                                                                                                                                                                                                 | <ul style="list-style-type: none"> <li>- Nationwide cohort in South Korea</li> </ul> |
| Bias                         | 9 | Describe any efforts to address potential sources of bias                                                                                                                                                                           |                                                                                                                                                                                                                 | <ul style="list-style-type: none"> <li>- Propensity score matching</li> </ul>        |

|                        |    |                                                                                                                                                                                                                                                                                                                                                                                                                                                                                                                    |  |                                                         |
|------------------------|----|--------------------------------------------------------------------------------------------------------------------------------------------------------------------------------------------------------------------------------------------------------------------------------------------------------------------------------------------------------------------------------------------------------------------------------------------------------------------------------------------------------------------|--|---------------------------------------------------------|
|                        |    |                                                                                                                                                                                                                                                                                                                                                                                                                                                                                                                    |  | - Child screening cohort<br>- Sibling comparison cohort |
| Study size             | 10 | Explain how the study size was arrived at                                                                                                                                                                                                                                                                                                                                                                                                                                                                          |  | - Nationwide cohort in South Korea                      |
| Quantitative variables | 11 | Explain how quantitative variables were handled in the analyses. If applicable, describe which groupings were chosen, and why                                                                                                                                                                                                                                                                                                                                                                                      |  | - Nationwide cohort in South Korea                      |
| Statistical methods    | 12 | (a) Describe all statistical methods, including those used to control for confounding<br>(b) Describe any methods used to examine subgroups and interactions<br>(c) Explain how missing data were addressed<br>(d) <i>Cohort study</i> - If applicable, explain how loss to follow-up was addressed<br><i>Case-control study</i> - If applicable, explain how matching of cases and controls was addressed<br><i>Cross-sectional study</i> - If applicable, describe analytical methods taking account of sampling |  | Statistical analysis                                    |



|                                  |    |                                                                                                                                                                                                                         |                                                                                                                                                                                                                                                                                     |                      |
|----------------------------------|----|-------------------------------------------------------------------------------------------------------------------------------------------------------------------------------------------------------------------------|-------------------------------------------------------------------------------------------------------------------------------------------------------------------------------------------------------------------------------------------------------------------------------------|----------------------|
|                                  |    | strategy<br>(e) Describe any sensitivity analyses                                                                                                                                                                       |                                                                                                                                                                                                                                                                                     |                      |
| Data access and cleaning methods |    | ..                                                                                                                                                                                                                      | <p>RECORD 12.1: Authors should describe the extent to which the investigators had access to the database population used to create the study population.</p> <p>RECORD 12.2: Authors should provide information on the data cleaning methods used in the study.</p>                 | Statistical analysis |
| Linkage                          |    | ..                                                                                                                                                                                                                      | <p>RECORD 12.3: State whether the study included person-level, institutional-level, or other data linkage across two or more databases. The methods of linkage and methods of linkage quality evaluation should be provided.</p>                                                    | Statistical analysis |
| <b>Results</b>                   |    |                                                                                                                                                                                                                         |                                                                                                                                                                                                                                                                                     |                      |
| Participants                     | 13 | (a) Report the numbers of individuals at each stage of the study ( <i>e.g.</i> , numbers potentially eligible, examined for eligibility, confirmed eligible, included in the study, completing follow-up, and analysed) | <p>RECORD 13.1: Describe in detail the selection of the persons included in the study (<i>i.e.</i>, study population selection) including filtering based on data quality, data availability and linkage. The selection of included persons can be described in the text and/or</p> | Results              |

|                  |    |                                                                                                                                                                                                                                                                                                                                                 |                                     |         |
|------------------|----|-------------------------------------------------------------------------------------------------------------------------------------------------------------------------------------------------------------------------------------------------------------------------------------------------------------------------------------------------|-------------------------------------|---------|
|                  |    | (b) Give reasons for non-participation at each stage.<br>(c) Consider use of a flow diagram                                                                                                                                                                                                                                                     | by means of the study flow diagram. |         |
| Descriptive data | 14 | (a) Give characteristics of study participants ( <i>e.g.</i> , demographic, clinical, social) and information on exposures and potential confounders<br>(b) Indicate the number of participants with missing data for each variable of interest<br>(c) <i>Cohort study</i> - summarise follow-up time ( <i>e.g.</i> , average and total amount) |                                     | Results |
| Outcome data     | 15 | <i>Cohort study</i> - Report numbers of outcome events or summary measures over time<br><i>Case-control study</i> - Report numbers in each exposure category, or summary measures of exposure<br><i>Cross-sectional study</i> - Report numbers of outcome events or summary measures                                                            |                                     | Results |
| Main results     | 16 | (a) Give unadjusted estimates and, if applicable,                                                                                                                                                                                                                                                                                               |                                     | Results |

|                   |    |                                                                                                                                                                                                                                                                                                                                                                              |                                                                                                                                                                                                           |             |
|-------------------|----|------------------------------------------------------------------------------------------------------------------------------------------------------------------------------------------------------------------------------------------------------------------------------------------------------------------------------------------------------------------------------|-----------------------------------------------------------------------------------------------------------------------------------------------------------------------------------------------------------|-------------|
|                   |    | <p>confounder-adjusted estimates and their precision (e.g., 95% confidence interval). Make clear which confounders were adjusted for and why they were included</p> <p>(b) Report category boundaries when continuous variables were categorized</p> <p>(c) If relevant, consider translating estimates of relative risk into absolute risk for a meaningful time period</p> |                                                                                                                                                                                                           |             |
| Other analyses    | 17 | Report other analyses done—e.g., analyses of subgroups and interactions, and sensitivity analyses                                                                                                                                                                                                                                                                            |                                                                                                                                                                                                           | Results     |
| <b>Discussion</b> |    |                                                                                                                                                                                                                                                                                                                                                                              |                                                                                                                                                                                                           |             |
| Key results       | 18 | Summarise key results with reference to study objectives                                                                                                                                                                                                                                                                                                                     |                                                                                                                                                                                                           | Discussion  |
| Limitations       | 19 | <p>Discuss limitations of the study, taking into account sources of potential bias or imprecision.</p> <p>Discuss both direction and magnitude of any potential bias</p>                                                                                                                                                                                                     | RECORD 19.1: Discuss the implications of using data that were not created or collected to answer the specific research question(s). Include discussion of misclassification bias, unmeasured confounding, | Limitations |

|                                                           |    |                                                                                                                                                                            |                                                                                                                                                          |                                                                                |
|-----------------------------------------------------------|----|----------------------------------------------------------------------------------------------------------------------------------------------------------------------------|----------------------------------------------------------------------------------------------------------------------------------------------------------|--------------------------------------------------------------------------------|
|                                                           |    |                                                                                                                                                                            | missing data, and changing eligibility over time, as they pertain to the study being reported.                                                           |                                                                                |
| Interpretation                                            | 20 | Give a cautious overall interpretation of results considering objectives, limitations, multiplicity of analyses, results from similar studies, and other relevant evidence |                                                                                                                                                          | Possible mechanisms in neuropsychiatric outcomes and prenatal opioid exposure. |
| Generalisability                                          | 21 | Discuss the generalisability (external validity) of the study results                                                                                                      |                                                                                                                                                          | Comparisons with previous research                                             |
| <b>Other Information</b>                                  |    |                                                                                                                                                                            |                                                                                                                                                          |                                                                                |
| Funding                                                   | 22 | Give the source of funding and the role of the funders for the present study and, if applicable, for the original study on which the present article is based              |                                                                                                                                                          | Funding                                                                        |
| Accessibility of protocol, raw data, and programming code | 23 | ..                                                                                                                                                                         | RECORD 22.1: Authors should provide information on how to access any supplemental information such as the study protocol, raw data, or programming code. | NA                                                                             |

RECORD, the reporting of studies conducted using observational routinely-collected health data; STROBE, the strengthening the reporting of observational studies in epidemiology

\*Reference: Benchimol EI, Smeeth L, Guttman A, Harron K, Moher D, Petersen I, Sørensen HT, von Elm E, Langan SM, the RECORD Working Committee. The REporting of studies Conducted using Observational Routinely-collected health Data (RECORD) Statement. PLoS Medicine 2015; in press.

\*Checklist is protected under Creative Commons Attribution ([CC BY](#)) license.

**Table S2.** Variable sources and codes used to define exclusion criteria, exposure, outcome of interest, and covariates

| <b>Variables</b>                                                                                                        | <b>Source</b>              | <b>Codes</b>                                                                                    |
|-------------------------------------------------------------------------------------------------------------------------|----------------------------|-------------------------------------------------------------------------------------------------|
| <b>Exclusion criteria</b>                                                                                               |                            |                                                                                                 |
| Immune mechanism disorders                                                                                              | ICD-10 code                | D80-D84, D89                                                                                    |
| Cystic fibrosis                                                                                                         | ICD-10 code                | E84                                                                                             |
| Chronic kidney disease                                                                                                  | ICD-10 code                | N18                                                                                             |
| Beta-thalassemia or sickle-cell disorders                                                                               | ICD-10 code                | D56.1, D57                                                                                      |
| Cancer                                                                                                                  | ICD-10 code                | C00-C99                                                                                         |
| Teratogenic/genetic syndromes, microdeletions, chromosomal, abnormalities, and malformation syndromes with known causes | ICD-10 code                | D821, P350-P351, P371, Q447, Q619, Q751, Q754, Q771-Q772, Q780, Q796, Q85-Q87, Q90-Q93, Q95-Q99 |
| <b>Exposure</b>                                                                                                         |                            |                                                                                                 |
| Opioid                                                                                                                  | Pharmaceutical information | NHIS-NHID procedure codes                                                                       |
| <b>Outcomes of interest</b>                                                                                             |                            |                                                                                                 |
| Neuropsychiatric disorders                                                                                              | ICD-10 code                | F00-F99                                                                                         |
| Severe neuropsychiatric disorder                                                                                        | ICD-10 code                | F20-25, F28-31, F32.3, F33.3                                                                    |
| Alcohol or drug misuse                                                                                                  | ICD-10 code                | F10-F19                                                                                         |
| Mood disorders except those with psychotic symptoms                                                                     | ICD-10 code                | F32-34, F38-39 (exclude F32.3, F33.3)                                                           |
| Anxiety and stress-related disorders                                                                                    | ICD-10 code                | F40-48                                                                                          |
| Eating disorders                                                                                                        | ICD-10 code                | F50                                                                                             |
| Compulsive disorders                                                                                                    | ICD-10 code                | F42                                                                                             |
| ADHD                                                                                                                    | ICD-10 code                | F90                                                                                             |
| ASD                                                                                                                     | ICD-10 code                | F84.0, F84.1, F84.5, F84.8, F84.9                                                               |
| Intellectual disability                                                                                                 | ICD-10 code                | F70-F79                                                                                         |
| <b>Maternal health indications related to opioid prescriptions</b>                                                      |                            |                                                                                                 |
| Infectious and parasitic diseases                                                                                       | ICD-10 code                | A00-A99, B00-B99                                                                                |
| Neoplasm (benign), Diseases of the blood and blood-forming organs and certain disorders involving the immune mechanism  | ICD-10 code                | D00-D99                                                                                         |
| Endocrine, nutritional and metabolic diseases                                                                           | ICD-10 code                | E00-E99                                                                                         |
| Neuropsychiatric disorders                                                                                              | ICD-10 code                | F00-F99                                                                                         |
| Diseases of the nervous system                                                                                          | ICD-10 code                | G00-G99                                                                                         |

|                                                          |                            |                                                                                                                                                                                                                                                                                                                                                                                            |
|----------------------------------------------------------|----------------------------|--------------------------------------------------------------------------------------------------------------------------------------------------------------------------------------------------------------------------------------------------------------------------------------------------------------------------------------------------------------------------------------------|
| Diseases of the ear and mastoid process                  | ICD-10 code                | H00-H95                                                                                                                                                                                                                                                                                                                                                                                    |
| Diseases of the circulatory system                       | ICD-10 code                | I00-I99                                                                                                                                                                                                                                                                                                                                                                                    |
| Diseases of the respiratory system                       | ICD-10 code                | J00-J99                                                                                                                                                                                                                                                                                                                                                                                    |
| Diseases of digestive system                             | ICD-10 code                | K00-K99                                                                                                                                                                                                                                                                                                                                                                                    |
| Diseases of the skin and subcutaneous tissue             | ICD-10 code                | L00-L99                                                                                                                                                                                                                                                                                                                                                                                    |
| Diseases of musculoskeletal system and connective tissue | ICD-10 code                | M00-M99                                                                                                                                                                                                                                                                                                                                                                                    |
| Diseases of the genitourinary system                     | ICD-10 code                | N00-N99                                                                                                                                                                                                                                                                                                                                                                                    |
| Other                                                    | ICD-10 code                | O00-O99, P00-P99, Q00-Q99, R00-R99, S00-S99, T00-T99, Z00-Z99                                                                                                                                                                                                                                                                                                                              |
| <b>Maternal neuropsychiatric conditions</b>              |                            |                                                                                                                                                                                                                                                                                                                                                                                            |
| Neuropsychiatric disorders                               | ICD-10 code                | Common: F00-F99<br>Severe: F20-25, F28-31, F32.3, F33.3                                                                                                                                                                                                                                                                                                                                    |
| Alcohol or drug misuse                                   | ICD-10 code                | F10-F19                                                                                                                                                                                                                                                                                                                                                                                    |
| Mood disorders except those with psychotic symptoms      | ICD-10 code                | F32-34, F38-39, excluding F32.3 and F33.3                                                                                                                                                                                                                                                                                                                                                  |
| Anxiety and stress-related disorders                     | ICD-10 code                | F40-48                                                                                                                                                                                                                                                                                                                                                                                     |
| Sleep disorders                                          | ICD-10 code                | Insomnia: F51.0, G47.0<br>Hypersomnia: F51.1, G47.1<br>Disorder of sleep-wake schedule (circadian rhythm): F51.2, G47.2<br>Sleepwalking: F51.3<br>Night terrors: F51.4<br>Nightmares: F51.5<br>Other specified sleep disorders: F51.8, G47.8<br>Other sleep disorders, unspecified: F51.9, G47.9<br>Restless legs syndrome: G25.8<br>Sleep apnea: G47.3<br>Narcolepsy and cataplexy: G47.4 |
| Epilepsy                                                 | ICD-10 code                | G40, F44.4                                                                                                                                                                                                                                                                                                                                                                                 |
| Other neuropsychiatry disorders                          | ICD-10 code                | Eating disorders: F50<br>Compulsive disorders: F42<br>ADHD: F90<br>ASD: F84.0, F84.1, F84.5, F84.8, F84.9<br>Intellectual disability: F70-F79                                                                                                                                                                                                                                              |
| <b>Concomitant drugs</b>                                 |                            |                                                                                                                                                                                                                                                                                                                                                                                            |
| NSAID                                                    | Pharmaceutical information | NHIS-NHID procedure codes                                                                                                                                                                                                                                                                                                                                                                  |
| Acetaminophen                                            | Pharmaceutical information | NHIS-NHID procedure codes                                                                                                                                                                                                                                                                                                                                                                  |

| Maternal characteristics  |                       |                                                                                                                                                                                                                                                                                                                                                                                                                                                                                                                                                                                                                                                                                                                                                                                                                                                                                                                                                                                                                                                                                                                                                                                                                                                                                                                                                                                                                                                                                                                                                                                                                                                                                                                                     |
|---------------------------|-----------------------|-------------------------------------------------------------------------------------------------------------------------------------------------------------------------------------------------------------------------------------------------------------------------------------------------------------------------------------------------------------------------------------------------------------------------------------------------------------------------------------------------------------------------------------------------------------------------------------------------------------------------------------------------------------------------------------------------------------------------------------------------------------------------------------------------------------------------------------------------------------------------------------------------------------------------------------------------------------------------------------------------------------------------------------------------------------------------------------------------------------------------------------------------------------------------------------------------------------------------------------------------------------------------------------------------------------------------------------------------------------------------------------------------------------------------------------------------------------------------------------------------------------------------------------------------------------------------------------------------------------------------------------------------------------------------------------------------------------------------------------|
| Maternal age              | Basic information     | -                                                                                                                                                                                                                                                                                                                                                                                                                                                                                                                                                                                                                                                                                                                                                                                                                                                                                                                                                                                                                                                                                                                                                                                                                                                                                                                                                                                                                                                                                                                                                                                                                                                                                                                                   |
| Region of residence       | Basic information     | -                                                                                                                                                                                                                                                                                                                                                                                                                                                                                                                                                                                                                                                                                                                                                                                                                                                                                                                                                                                                                                                                                                                                                                                                                                                                                                                                                                                                                                                                                                                                                                                                                                                                                                                                   |
| Income                    | Basic information     | -                                                                                                                                                                                                                                                                                                                                                                                                                                                                                                                                                                                                                                                                                                                                                                                                                                                                                                                                                                                                                                                                                                                                                                                                                                                                                                                                                                                                                                                                                                                                                                                                                                                                                                                                   |
| Parity                    | Health insurance data | NHIS-NHID procedure codes                                                                                                                                                                                                                                                                                                                                                                                                                                                                                                                                                                                                                                                                                                                                                                                                                                                                                                                                                                                                                                                                                                                                                                                                                                                                                                                                                                                                                                                                                                                                                                                                                                                                                                           |
| Severe maternal morbidity | ICD-10 code           | <p>Pre-existing hypertensive heart disease: O10.1</p> <p>Pre-existing hypertensive heart and renal disease: O10.3</p> <p>Eclampsia: O15</p> <p>Cerebral venous thrombosis in pregnancy: O22.5</p> <p>Cerebral venous thrombosis in the puerperium: O87.3</p> <p>Pulmonary, cardiac, and central nervous system complications of anesthesia during pregnancy, labor and delivery, and the puerperium: O29.0, O29.1, O29.2, O89.0, O89.1, O89.2, O74.0, O74.1, O74.2, O74.3</p> <p>Placental abruption with coagulation defect: O45.0</p> <p>Antepartum hemorrhage with coagulation defect: O46.0</p> <p>Intrapartum hemorrhage with coagulation defect: O67.0</p> <p>Rupture of uterus before onset of labor: O71.0</p> <p>Rupture of uterus during labor: O71.1</p> <p>Obstetric shock: O75.1, R57, T80.5, T88.6</p> <p>Septicemia during labor: O75.3</p> <p>Puerperal sepsis: O85</p> <p>Obstetric embolism: O88</p> <p>Cardiomyopathy in the puerperium: O90.3, I42, I43</p> <p>Acute renal failure: O90.4, N17, N19, N99.0</p> <p>Death, obstetric, cause unspecified: O95</p> <p>Death, obstetric, after 42 days but 1 year after delivery: O96</p> <p>Death from sequelae of direct obstetric causes: O97</p> <p>Sudden death, death from unspecified cause: R96-R99</p> <p>HIV disease: B20-B24, Z21</p> <p>Cardiac arrest, cardiac failure, myocardial infarction, or pulmonary edema: O89.1, O74.2, O75.4, I21-I22, I46, I50, J81</p> <p>Cerebrovascular diseases: subarachnoid and intracranial hemorrhage, cerebral infarction, stroke: I60-I64</p> <p>Adult respiratory distress syndrome: J80</p> <p>Acute abdomen: K35, K37, K65, N73.3, N73.5</p> <p>Hepatic failure: K71-K72</p> <p>Acute psychosis: F53.1, F23</p> |



|                               |                                                                                    |                                                                                                                                                                                                               |
|-------------------------------|------------------------------------------------------------------------------------|---------------------------------------------------------------------------------------------------------------------------------------------------------------------------------------------------------------|
|                               |                                                                                    | Cerebral edema or coma: G93.6, R40.2<br>Disseminated intravascular coagulation: D65<br>Sickle cell anemia with crisis: D57.0<br>Status asthmaticus: J45.01, J45.11, J45.81, J45.91<br>Status epilepticus: G41 |
| Delivery type                 | ICD-10 code                                                                        | Cesarean section: O82                                                                                                                                                                                         |
| Hospital admissions           | Health insurance data                                                              | NHIS-NHID procedure codes                                                                                                                                                                                     |
| Outpatient contacts           | Health insurance data                                                              | NHIS-NHID procedure codes                                                                                                                                                                                     |
| <b>Infant characteristics</b> |                                                                                    |                                                                                                                                                                                                               |
| Sex                           | Basic information                                                                  | -                                                                                                                                                                                                             |
| Birth season                  | Basic information                                                                  | -                                                                                                                                                                                                             |
| Year of delivery              | Basic information                                                                  | -                                                                                                                                                                                                             |
| Preterm birth                 | ICD-10 code                                                                        | P07.2-P07.3                                                                                                                                                                                                   |
| Low birth weight              | ICD-10 code                                                                        | P07.0-P07.1                                                                                                                                                                                                   |
| Breastfeeding                 | National Health Screening Program for infants and children at 6 months after birth | Questionnaire with personal medical interview                                                                                                                                                                 |

ADHD, attention-deficit hyperactivity disorder; ASD, autism spectrum disorder; ICD-10, international classification of diseases 10th revision; NHIS-NHID, national health insurance service-national health information database; NSAID, nonsteroidal anti-inflammatory drug

\*Reference: Joseph KS, Liu S, Rouleau J, Kirby RS, Kramer MS, Sauve R, Fraser WD, Young DC, Liston RM. Severe maternal morbidity in Canada, 2003 to 2007: surveillance using routine hospitalization data and ICD-10CA codes. *J Obstet Gynaecol Can.* 2010 Sep;32(9):837-846. doi: 10.1016/S1701-2163(16)34655-2. PMID: 21050516.

**Table S3.** Study design and participants with excluded criteria

|                                                                                                  | <b>Infant-linked mothers</b> | <b>Mothers-linked infant</b> |
|--------------------------------------------------------------------------------------------------|------------------------------|------------------------------|
| <b>Total N</b>                                                                                   | <b>2,369,322</b>             | <b>3,251,594</b>             |
| <b>Excluded criteria</b>                                                                         |                              |                              |
| Inadequate socioeconomic status                                                                  | 12                           | 54                           |
| Missing birth dates of infant                                                                    | 41,030                       | 76,028                       |
| Infant with immune mechanism disorders                                                           | 485                          | 936                          |
| Infant with cystic fibrosis                                                                      | 9                            | 18                           |
| Infant with chronic kidney diseases                                                              | 180                          | 338                          |
| Infant with beta-thalassemia or sickle-cell disorders                                            | 12                           | 27                           |
| Infant with malignancy                                                                           | 2,101                        | 4,116                        |
| Infant with teratogenic/genetic syndromes, chromosomal abnormalities, and malformation syndromes | 2,758                        | 6,871                        |
| Neuropsychiatric disorders within 6 months after birth of infants                                | 18,679                       | 26,620                       |
| Mothers with cancer                                                                              | 4,392                        | 8,015                        |
| <b>Included n</b>                                                                                | <b>2,299,664</b>             | <b>3,128,571</b>             |

**Table S4.** Specific prescription opioid considered and number of prescriptions (n=832,276)

| <b>Specific opioid</b> | <b>Number of prescriptions (%)</b> |
|------------------------|------------------------------------|
| Codeine                | 17,014 (2.0)                       |
| Fentanyl               | 4,518 (0.5)                        |
| Hydrocodone            | 717,906 (86.3)                     |
| Tramadol               | 90,313 (10.9)                      |
| Others*                | 2,525 (0.3)                        |

\*Butorphanol, hydromorphone, morphine, oxycodone, tapentadol

**Table S5.** Maternal health conditions among individuals with opioid prescriptions (total n=216,012)

| Specific disease                                                                                                       | Number of mothers (%)             |                               |
|------------------------------------------------------------------------------------------------------------------------|-----------------------------------|-------------------------------|
|                                                                                                                        | Full unmatched cohort (n=216,012) | PS-matched cohort (n=215,930) |
| Infectious and parasitic diseases                                                                                      | 2,549 (1.2)                       | 2,546 (1.2)                   |
| Neoplasm (benign), Diseases of the blood and blood-forming organs and certain disorders involving the immune mechanism | 428 (0.2)                         | 428 (0.2)                     |
| Endocrine, nutritional and metabolic diseases                                                                          | 1,442 (0.7)                       | 1,441 (0.7)                   |
| Neuropsychiatric disorders                                                                                             | 322 (0.1)                         | 321 (0.2)                     |
| Diseases of the nervous system                                                                                         | 1,025 (0.5)                       | 1,021 (0.5)                   |
| Diseases of the ear and mastoid process                                                                                | 4,300 (2.0)                       | 4,298 (2.0)                   |
| Diseases of the circulatory system                                                                                     | 412 (0.2)                         | 412 (0.2)                     |
| Diseases of the respiratory system                                                                                     | 66,676 (30.9)                     | 66,654 (30.9)                 |
| Diseases of digestive system                                                                                           | 32,400 (15.0)                     | 32,388 (15.0)                 |
| Diseases of the skin and subcutaneous tissue                                                                           | 3,233 (1.5)                       | 3,231 (1.5)                   |
| Diseases of musculoskeletal system and connective tissue                                                               | 16,559 (7.7)                      | 16,546 (7.7)                  |
| Diseases of the genitourinary system                                                                                   | 2,729 (1.3)                       | 2,729 (1.3)                   |
| Other                                                                                                                  | 83,937 (38.9)                     | 83,915 (38.9)                 |

**Table S6.** List of references of validation of ICD-10 code for neuropsychiatric disorders

| Variables                        | ICD-10 code                                   | Code validation and reference                                                                                                                                                                                                                                                                                                                                                                                                                                                                                                                                                                                                                                                                                                                                                                                                                                                                                                                                                         | Justification                                                                                                                |
|----------------------------------|-----------------------------------------------|---------------------------------------------------------------------------------------------------------------------------------------------------------------------------------------------------------------------------------------------------------------------------------------------------------------------------------------------------------------------------------------------------------------------------------------------------------------------------------------------------------------------------------------------------------------------------------------------------------------------------------------------------------------------------------------------------------------------------------------------------------------------------------------------------------------------------------------------------------------------------------------------------------------------------------------------------------------------------------------|------------------------------------------------------------------------------------------------------------------------------|
| Severe neuropsychiatric disorder | F20-24, F28-29, F25, F30-31, F32.3, and F33.3 | <p>All patients aged between 10 and 17 years who had presented to SLaM services were screened for ICD-10 diagnoses within clinician-recorded structured or unstructured free text fields. Those with structured data recorded were included if they had at least 1 psychosis diagnosis (ICD-10 codes F20-F29, F30-31, F32.3, F33.3, F1x.5). A random sample of 100 records revealed this identification process provided a 0.98 positive predictive value for psychotic disorder diagnosis.</p> <p>Reference: Downs JM, Lechler S, Dean H, Sears N, Patel R, Shetty H, Simonoff E, Hotopf M, Ford TJ, Diaz-Caneja CM, Arango C, MacCabe JH, Hayes RD, Pina-Camacho L. The Association Between Comorbid Autism Spectrum Disorders and Antipsychotic Treatment Failure in Early-Onset Psychosis: A Historical Cohort Study Using Electronic Health Records. <i>J Clin Psychiatry</i>. 2017 Nov/Dec;78(9):e1233-e1241. doi: 10.4088/JCP.16m11422. PMID: 29125721; PMCID: PMC6037287.</p> | ICD-10 code for severe neuropsychiatric disorder (F20-F29, F30-31, F32.3, F33.3, F1x.5) were validated by previous research. |
| Alcohol or drug misuse           | F10-19                                        | <p>They validated ICD-10 substance use codes for opioids (F11), stimulants (F15), cocaine (F14) and multiple substances (F19). All substance use codes shared the similar patten with high positive predictive value, ranging 78.8 – 92.0 %.</p> <p>Reference: Campanile Y, Silverman M. Sensitivity, specificity and predictive values of</p>                                                                                                                                                                                                                                                                                                                                                                                                                                                                                                                                                                                                                                        | ICD-10 code for alcohol or drug misuse (F10-19) were partially validated by previous research.                               |

|                                                     |                                           |                                                                                                                                                                                                                                                                                                                                                                                                                |                                                                                                                                                                                                                                     |
|-----------------------------------------------------|-------------------------------------------|----------------------------------------------------------------------------------------------------------------------------------------------------------------------------------------------------------------------------------------------------------------------------------------------------------------------------------------------------------------------------------------------------------------|-------------------------------------------------------------------------------------------------------------------------------------------------------------------------------------------------------------------------------------|
|                                                     |                                           | ICD-10 substance use codes in a cohort of substance use-related endocarditis patients. Am J Drug Alcohol Abuse. 2022 Sep 3;48(5):538-547. doi: 10.1080/00952990.2022.2047713. Epub 2022 May 17. PMID: 35579599.                                                                                                                                                                                                |                                                                                                                                                                                                                                     |
| Mood disorders except those with psychotic symptoms | F32-34, F38-39, excluding F32.3 and F33.3 | Based on the ICD-10 diagnostic criteria, mood disorders showed 91.1% positive predictive value.<br><br>Reference: Fiest KM, Jette N, Quan H, St Germaine-Smith C, Metcalfe A, Patten SB, Beck CA. Systematic review and assessment of validated case definitions for depression in administrative data. BMC Psychiatry. 2014 Oct 17;14:289. doi: 10.1186/s12888-014-0289-5. PMID: 25322690; PMCID: PMC4201696. | ICD-10 code for mood disorders were validated by previous research.                                                                                                                                                                 |
| Anxiety and stress-related disorders                | F40-48                                    | NA                                                                                                                                                                                                                                                                                                                                                                                                             | While the ICD-10 codes for anxiety and stress-related disorders have not been validated, it is likely to be relatively accurate, in the Korea context, given the challenges of securing insurances if they had an F-code diagnosis. |
| Eating disorders                                    | F50                                       | Based on the ICD-10 diagnostic criteria, eating disorders were categorized into three subtypes, including anorexia nervosa, bulimia nervosa, and unspecified eating disorders.                                                                                                                                                                                                                                 | ICD-10 code for eating disorders were validated by previous                                                                                                                                                                         |

|                                |     |                                                                                                                                                                                                                                                                                                                                                                                                                                                                                                                                                                                                                                                                       |                                                                                   |
|--------------------------------|-----|-----------------------------------------------------------------------------------------------------------------------------------------------------------------------------------------------------------------------------------------------------------------------------------------------------------------------------------------------------------------------------------------------------------------------------------------------------------------------------------------------------------------------------------------------------------------------------------------------------------------------------------------------------------------------|-----------------------------------------------------------------------------------|
|                                |     | <p>Birgegård et al. showed 74.7-83.6% predictive values of ICD-10 codes.</p> <p>Reference: Birgegård A, Forsén Mantilla E, Dinkler L, Hedlund E, Savva A, Larsson H, Bulik CM. Validity of eating disorder diagnoses in the Swedish national patient register. <i>J Psychiatr Res.</i> 2022 Jun;150:227-230. doi: 10.1016/j.jpsychires.2022.03.064. Epub 2022 Apr 4. PMID: 35398665.</p>                                                                                                                                                                                                                                                                              | research.                                                                         |
| Obsessive-compulsive disorders | F42 | <p>Based on the ICD-10 diagnostic criteria, obsessive-compulsive disorder (F42) were diagnosed with high validity (91-96% predictive values). Cases were identified in the obsessive-compulsive disorder between 1969 and 2009. Diagnosis at one point in time suffered for inclusion.</p> <p>Reference: Rück C, Larsson KJ, Lind K, Perez-Vigil A, Isomura K, Sariaslan A, Lichtenstein P, Mataix-Cols D. Validity and reliability of chronic tic disorder and obsessive-compulsive disorder diagnoses in the Swedish National Patient Register. <i>BMJ Open.</i> 2015 Jun 22;5(6):e007520. doi: 10.1136/bmjopen-2014-007520. PMID: 26100027; PMCID: PMC4480012.</p> | ICD-10 code for obsessive-compulsive disorder was validated by previous research. |
| ADHD                           | F90 | <p>Based on the ICD-10 diagnostic criteria, 86.8% of the ADHD diagnoses (F90) could be confirmed. With an agreement rate of 96% (k=0.83), the inter-rater agreement was also substantial. Cases were identified in ADHD between 1994 and 2005. Diagnosis at one point in time suffered for inclusion.</p> <p><a href="https://www.sciencedirect.com/science/article/abs/pii/S092493381602441X">https://www.sciencedirect.com/science/article/abs/pii/S092493381602441X</a></p>                                                                                                                                                                                        | ICD-10 code for ADHD was validated by previous research.                          |

|                         |                                               |                                                                                                                                                                                                                                                                                                                                                                                                                                                                                                                                                                                                                              |                                                                                                                                                                                                    |
|-------------------------|-----------------------------------------------|------------------------------------------------------------------------------------------------------------------------------------------------------------------------------------------------------------------------------------------------------------------------------------------------------------------------------------------------------------------------------------------------------------------------------------------------------------------------------------------------------------------------------------------------------------------------------------------------------------------------------|----------------------------------------------------------------------------------------------------------------------------------------------------------------------------------------------------|
| ASD                     | F84.0,<br>F84.1,<br>F84.5,<br>F84.8,<br>F84.9 | NA                                                                                                                                                                                                                                                                                                                                                                                                                                                                                                                                                                                                                           | While the ICD-10 codes for ASD have not been validated, it is likely to be relatively accurate, in the Korea context, given the challenges of securing insurances if they had an F-code diagnosis. |
| Intellectual disability | F70-F79                                       | Case was identified using up to 9 years of data from 1 July 2010 until 30 June 2019 via the presence of one or more diagnostic ICD-10 codes across any of the four data sets. Based on the ICD-10 diagnostic criteria, intellectual disability (F70-F79) were diagnosed with high 91% specificity.<br><br>Reference: Mohr-Jensen C, Vinkel Koch S, Briciet Lauritsen M, Steinhausen HC. The validity and reliability of the diagnosis of hyperkinetic disorders in the Danish Psychiatric Central Research Registry. Eur Psychiatry. 2016 May;35:16-24. doi: 10.1016/j.eurpsy.2016.01.2427. Epub 2016 Apr 7. PMID: 27061373. | ICD-10 code for intellectual disability were validated by previous research.                                                                                                                       |

ADHD, attention-deficit hyperactivity disorder; ASD, autism spectrum disorder; ICD-10, the international classification of disease, 10<sup>th</sup> edition



**Table S7.** The representativeness of the participants in the study

|                                   |                                                                                                                                                                                                                                                                 |
|-----------------------------------|-----------------------------------------------------------------------------------------------------------------------------------------------------------------------------------------------------------------------------------------------------------------|
| Category                          |                                                                                                                                                                                                                                                                 |
| Disease                           | Neuropsychiatric disorders encompass conditions such as alcohol or drug misuse, mood disorders (excluding those with psychotic symptoms), anxiety and stress-related disorders, eating disorders, compulsive disorders, ADHD, ASD, and intellectual disability. |
| Special considerations related to |                                                                                                                                                                                                                                                                 |
| Sex                               | While males are more prone to neurodevelopmental disorders such as ASD and ADHD, females are more susceptible to anxiety disorders and major depressive disorders.                                                                                              |
| Age                               | The vast majority of neuropsychiatric disorders begin in childhood, especially in the age range 5 to 15.                                                                                                                                                        |
| Socioeconomic status              | Children and adolescents with low socioeconomic status showed higher risk of neuropsychiatric disorders.                                                                                                                                                        |
| Environment                       | Environmental factors including pollution, noise, and secondhand smoke may have a various impact on overall neuropsychiatric disorders.                                                                                                                         |
| Other considerations              | Neuropsychiatric disorders vary broadly within and among countries throughout the world. They are associated with major comorbidities, including Alzheimer’s disease, family history, maternal smoking during pregnancy and maternal obesity.                   |

|                                          |                                                                                                                                                                                                                                                                                                                                                                                                       |
|------------------------------------------|-------------------------------------------------------------------------------------------------------------------------------------------------------------------------------------------------------------------------------------------------------------------------------------------------------------------------------------------------------------------------------------------------------|
| Overall representativeness of this study | We analyzed a large-scale population-based study consisted of 3.1 million Korean children with elaborated statistical techniques to support the key findings. We observed the expected rates of neuropsychiatric disorders for most of the factors above and considered those factors as confounding variables, investigating the impact of early-life opioid exposure on neuropsychiatric disorders. |
|------------------------------------------|-------------------------------------------------------------------------------------------------------------------------------------------------------------------------------------------------------------------------------------------------------------------------------------------------------------------------------------------------------------------------------------------------------|

ADHD, attention-deficit hyperactivity disorder; ASD, autism spectrum disorder

**Table S8.** Summary of dataset and cohort

| # | Cohort                                                                | Sample size                                                                             | Time frame                                                                                                                   | Structure of cohort                                                                           | Methods                                                                                            |
|---|-----------------------------------------------------------------------|-----------------------------------------------------------------------------------------|------------------------------------------------------------------------------------------------------------------------------|-----------------------------------------------------------------------------------------------|----------------------------------------------------------------------------------------------------|
| 1 | Full unmatched cohort                                                 | 216,012 children with opioid exposure and<br>2,912,559 children without opioid exposure | Birth date of infants in 2010-2017, with<br>follow-up from the date of birth until<br>the date of death or December 31, 2020 | Birth cohort                                                                                  | - Cox proportional hazards model<br><br>- Unmatched                                                |
| 2 | PS-matched cohort A                                                   | 215,958 children with opioid exposure and<br>1,075,454 children without opioid exposure | Birth date of infants in 2010-2017, with<br>follow-up from the date of birth until<br>the date of death or December 31, 2020 | Birth cohort                                                                                  | - Cox proportional hazards model<br><br>- 1:5 PS-matched (univariate<br>logistic regression model) |
| 3 | Child screening cohort                                                | 93,704 children with opioid exposure and<br>1,263,815 children without opioid exposure  | Birth date of infants in 2010-2017, with<br>follow-up from the date of birth until<br>the date of death or December 31, 2020 | Birth cohort linked with the<br>National Health Screening<br>Program for infants and children | - Cox proportional hazards model<br><br>- Unmatched                                                |
| 4 | PS-matched cohort B (birth<br>date of infants in 2010-2015)           | 146,789 children with opioid exposure and<br>731,115 children without opioid exposure   | Birth date of infants in 2010-2015, with<br>follow-up from the date of birth until<br>the date of death or December 31, 2020 | Birth cohort                                                                                  | - Cox proportional hazards model<br><br>- 1:5 PS-matched (univariate<br>logistic regression model) |
| 5 | PS-matched cohort C<br>(‘outcome’ criteria with<br>above 1 diagnosis) | 215,958 children with opioid exposure and<br>1,075,454 children without opioid exposure | Birth date of infants in 2010-2017, with<br>follow-up from the date of birth until<br>the date of death or December 31, 2020 | Birth cohort                                                                                  | - Cox proportional hazards model<br><br>- 1:5 PS-matched (univariate<br>logistic regression model) |
| 6 | Sibling cohort A from the<br>full unmatched cohort                    | 105,339 children with opioid exposure and<br>114,007 children without opioid exposure   | Birth date of infants in 2010-2017, with<br>follow-up from the date of birth until                                           | Birth cohort                                                                                  | - Cox proportional hazards model<br><br>- Unmatched                                                |

|   |                                                  |                                                                                  |                                                                                                                        |                                                                                         |                                                                                                                                                   |
|---|--------------------------------------------------|----------------------------------------------------------------------------------|------------------------------------------------------------------------------------------------------------------------|-----------------------------------------------------------------------------------------|---------------------------------------------------------------------------------------------------------------------------------------------------|
|   |                                                  |                                                                                  | the date of death or December 31, 2020                                                                                 |                                                                                         | - Sibling matched with different exposure statuses                                                                                                |
| 7 | Sibling cohort B from the PS-matched cohort      | 46,034 children with opioid exposure and 47,294 children without opioid exposure | Birth date of infants in 2010-2017, with follow-up from the date of birth until the date of death or December 31, 2020 | Birth cohort                                                                            | - Cox proportional hazards model<br>- 1:5 PS-matched (univariate logistic regression model)<br>- Sibling matched with different exposure statuses |
| 8 | Sibling cohort C from the child screening cohort | 20,699 children with opioid exposure and 21,221 children without opioid exposure | Birth date of infants in 2010-2017, with follow-up from the date of birth until the date of death or December 31, 2020 | Birth cohort linked with the National Health Screening Program for infants and children | - Cox proportional hazards model<br>- Unmatched<br>- Sibling matched with different exposure statuses                                             |

ICD-10, International Classification of Diseases, 10th edition; PS, propensity score

**Table S9.** National Health Screening Program for infants and children at 6 months after birth

| Infant and Toddler Checkup Questionnaire (6 months)                                                                                                                                                                                                                                                                                                                        |  |                          |  |                |    |     |
|----------------------------------------------------------------------------------------------------------------------------------------------------------------------------------------------------------------------------------------------------------------------------------------------------------------------------------------------------------------------------|--|--------------------------|--|----------------|----|-----|
| Infant's name                                                                                                                                                                                                                                                                                                                                                              |  | Social security number   |  | Parent Contact |    |     |
| Parent's name                                                                                                                                                                                                                                                                                                                                                              |  | Relationship to examinee |  | E-mail         |    |     |
| <p>The purpose of National Health Screening Program for infants and children is to check for normal growth and development in infants and child, not to detect specific conditions. Do you understand this?</p> <p><input type="checkbox"/> Yes    <input type="checkbox"/> No</p>                                                                                         |  |                          |  |                |    |     |
| <p>Do you consent to the examination of infant genitals during the physical examination?</p> <p><input type="checkbox"/> Yes    <input type="checkbox"/> No</p>                                                                                                                                                                                                            |  |                          |  |                |    |     |
| <p>1. Date of birth: _____year ____month ____day</p> <p>2. Birth weight: <input type="checkbox"/>.<input type="checkbox"/><input type="checkbox"/> kg</p> <p>3. Was the child born prematurely?</p> <p><input type="checkbox"/> Yes (estimated date of delivery? _____year ____month ____day or gestational age _____weeks ____day)</p> <p><input type="checkbox"/> No</p> |  |                          |  |                |    |     |
| Nutrition education                                                                                                                                                                                                                                                                                                                                                        |  |                          |  | Yes            | No | N/A |
| 1. If you are exclusively breastfeeding, your child may be deficient in iron during weaning. Are you giving your child iron supplements or iron-rich complementary foods (baby food)?                                                                                                                                                                                      |  |                          |  |                |    |     |
| 2. Do you know that breastfeeding can be continued beyond 24 months of age in combination with complementary foods (baby food or baby meals)?                                                                                                                                                                                                                              |  |                          |  |                |    |     |
| 3. Do you know that expressed breast milk can only be stored at room temperature for up to 4 hours?                                                                                                                                                                                                                                                                        |  |                          |  |                |    |     |
| 4. Do you know that breastfeeding moms do not need to stop breastfeeding if they take pain relievers, cold medicines, antibiotics, etc. unless there is a special need?                                                                                                                                                                                                    |  |                          |  |                |    |     |
| <p>5. How long have you been exclusively breastfeeding? (This refers to breastfeeding without the use of formula.)</p> <p><input type="checkbox"/> Less than 1 month      <input type="checkbox"/> 2 months      <input type="checkbox"/> 3 months      <input type="checkbox"/> 4 months</p>                                                                              |  |                          |  |                |    |     |
| Sleep education                                                                                                                                                                                                                                                                                                                                                            |  |                          |  | Yes            | No |     |
| 1. Do you put your child to bed on their back?                                                                                                                                                                                                                                                                                                                             |  |                          |  |                |    |     |
| 2. Does your child play on his/her stomach when awake to prevent flat head and promote development?                                                                                                                                                                                                                                                                        |  |                          |  |                |    |     |
| 3. Does your child sleep with you in the same sleeping arrangement (bed, bassinet,                                                                                                                                                                                                                                                                                         |  |                          |  |                |    |     |

|                                                                                                                                                                                                                                                        |     |    |
|--------------------------------------------------------------------------------------------------------------------------------------------------------------------------------------------------------------------------------------------------------|-----|----|
| etc.)?                                                                                                                                                                                                                                                 |     |    |
| 4. Do you put your child to bed after he/she has fallen asleep by holding or rocking him/her with a bottle of milk or formula?                                                                                                                         |     |    |
| 5. Do you engage in routine behaviors before putting your child to bed, such as bathing, massage, lullabies, or reading a book?                                                                                                                        |     |    |
| 6. If my child wakes up, do you put him/her to sleep with a latch on a breast or bottle of formula?                                                                                                                                                    |     |    |
| <b>Electronic media exposure training</b>                                                                                                                                                                                                              |     |    |
| 1. ※ Experts recommend limiting exposure to electronic media (e.g., smartphones, TVs, tablet PCs, etc.) before the age of 2 years.<br>Do you show your child electronic media?                                                                         | Yes | No |
| 2. Do you use electronic media when you are with your child?                                                                                                                                                                                           |     |    |
| 3. Do you watch it with them, when you show your child electronic media?                                                                                                                                                                               |     |    |
| 4. How much time does your child spend with electronic media on an average day?<br><input type="checkbox"/> Not at all <input type="checkbox"/> Less than 1 hour <input type="checkbox"/> Less than 2 hours <input type="checkbox"/> More than 2 hours |     |    |
| <b>Hip joint related</b>                                                                                                                                                                                                                               |     |    |
| 1. Has your child ever had a hip ultrasound examination for a developmental dysplasia of the hip?                                                                                                                                                      | Yes | No |
| 2. Has your child ever been diagnosed with a developmental dysplasia of the hip?                                                                                                                                                                       |     |    |
| <b>Safety prevention education</b>                                                                                                                                                                                                                     |     |    |
| 1. Do you always use an age- and weight-appropriate car seat when traveling by car?                                                                                                                                                                    | Yes | No |
| 2. Have you ever left your child unattended, even briefly, on an adult bed or couch?                                                                                                                                                                   |     |    |
| 3. Are you aware that your child could be seriously injured while using a walker?                                                                                                                                                                      |     |    |
| 4. Do you know that it is not good to shake your child vigorously when holding and soothing them?                                                                                                                                                      |     |    |
| 5. Have you ever left your child unattended in a bathtub, tub, or toilet, even for short time?                                                                                                                                                         |     |    |
| 6. Have you ever had a hot drink while holding your child?                                                                                                                                                                                             |     |    |
| 7. Have you ever put your child to sleep on an electric blanket or heating mat?                                                                                                                                                                        |     |    |
| <b>Vision related</b>                                                                                                                                                                                                                                  |     |    |
| 1. Does your child make good eye contact?                                                                                                                                                                                                              | Yes | No |
| 2. Does the pupil of your child have a strange position (crowded inward or outward without focus)?                                                                                                                                                     |     |    |
| 3. Is your child's black eye (pupil) cloudy?                                                                                                                                                                                                           |     |    |

| Hearing related                                                                                                                                                                                    | Yes | No |
|----------------------------------------------------------------------------------------------------------------------------------------------------------------------------------------------------|-----|----|
| 1. Does your child make a variety of sounds (“ah”, “ooh”, “ee”), or can your child make sounds when laughing?                                                                                      |     |    |
| 2. Has your child been in the neonatal intensive care unit (NICU) for more than 5 days after birth?                                                                                                |     |    |
| 3. Did your child have a newborn hearing screening (audiogram) within 1 month of birth (or within 1 month of birth if premature)?                                                                  |     |    |
| 4. Has your child ever been diagnosed as ‘refer’ in one or both ears from newborn hearing screening test?<br><input type="checkbox"/> Yes <input type="checkbox"/> No <input type="checkbox"/> N/A |     |    |
| 5. Has your child ever been diagnosed as ‘hearing loss’ in one or both ears?                                                                                                                       |     |    |
|                                                                                                                                                                                                    |     |    |
| Personal hygiene related                                                                                                                                                                           | Yes | No |
| 1. Do you always wash your hands before and after wiping your child’s eyes, nose, and mouth?                                                                                                       |     |    |

**Table S10.** Baseline characteristics of the study subjects in the child screening cohort from 2010 to 2017

|                                                            | <b>Total</b>     | <b>Children with prenatal opioid exposure</b> | <b>Children without prenatal exposure</b> |
|------------------------------------------------------------|------------------|-----------------------------------------------|-------------------------------------------|
| <b>Total, n</b>                                            | 1,362,519        | 93,704                                        | 1,268,815                                 |
| <b>Maternal characteristics</b>                            |                  |                                               |                                           |
| Maternal age at delivery year, mean (SD)                   | 31.8 (4.0)       | 32.2 (4.0)                                    | 31.8 (4.0)                                |
| Maternal age at delivery year, n (%)                       |                  |                                               |                                           |
| ≤ 19                                                       | 2,552 (0.2)      | 193 (0.2)                                     | 2,359 (0.2)                               |
| 20-24                                                      | 50,417 (3.7)     | 3,113 (3.3)                                   | 47,304 (3.7)                              |
| 25-29                                                      | 307,669 (22.6)   | 18,496 (19.7)                                 | 289,173 (22.8)                            |
| 30-34                                                      | 679,184 (49.9)   | 46,152 (49.3)                                 | 633,032 (49.9)                            |
| ≥ 35                                                       | 322,697 (23.7)   | 25,750 (27.5)                                 | 296,947 (23.4)                            |
| Region of residence, n (%)                                 |                  |                                               |                                           |
| Rural                                                      | 593,353 (43.6)   | 39,268 (41.9)                                 | 554,085 (43.7)                            |
| Urban                                                      | 769,166 (56.5)   | 54,436 (58.1)                                 | 714,730 (56.3)                            |
| Income level, n (%)                                        |                  |                                               |                                           |
| 1st quartile                                               | 293,449 (21.5)   | 21,349 (22.8)                                 | 272,100 (21.5)                            |
| 2nd quartile                                               | 354,967 (26.1)   | 24,456 (26.1)                                 | 330,511 (26.1)                            |
| 3rd quartile                                               | 352,571 (25.9)   | 24,076 (25.7)                                 | 328,495 (25.9)                            |
| 4th quartile                                               | 361,532 (26.5)   | 23,823 (25.4)                                 | 337,709 (26.6)                            |
| Parity, n (%)                                              |                  |                                               |                                           |
| 1                                                          | 1,008,581 (74.0) | 76,738 (81.9)                                 | 931,843 (73.4)                            |
| ≥ 2                                                        | 353,938 (26.0)   | 16,966 (18.1)                                 | 336,972 (26.6)                            |
| Maternal medical conditions, n (%)                         |                  |                                               |                                           |
| No mental illness                                          | 1,155,369 (84.8) | 73,757 (78.7)                                 | 1,081,612 (85.3)                          |
| Common                                                     | 188,896 (13.9)   | 18,024 (19.2)                                 | 170,872 (13.5)                            |
| Severe                                                     | 18,254 (1.3)     | 1,923 (2.1)                                   | 16,331 (1.3)                              |
| Alcohol or drug misuse, n (%)                              | 1,769 (0.1)      | 215 (0.2)                                     | 1,554 (0.1)                               |
| Mood disorders except those with psychotic symptoms, n (%) | 35,796 (2.6)     | 3,984 (4.3)                                   | 31,812 (2.5)                              |
| Anxiety and stress-related disorders, n (%)                | 64,286 (4.7)     | 6,885 (7.4)                                   | 57,401 (4.5)                              |
| Sleep disorders, n (%)                                     | 29,065 (2.1)     | 3,542 (3.8)                                   | 25,523 (2.0)                              |
| Epilepsy, n (%)                                            | 4,119 (0.3)      | 378 (0.4)                                     | 3,741 (0.3)                               |
| Other neuropsychiatry disorders, n (%)                     | 3,172 (0.2)      | 307 (0.3)                                     | 2,865 (0.2)                               |
| Severe maternal morbidity, n (%)                           |                  |                                               |                                           |
| 0                                                          | 1,275,572 (93.6) | 85,941 (91.7)                                 | 1,189,631 (93.8)                          |



|                                                                        |                  |               |                  |
|------------------------------------------------------------------------|------------------|---------------|------------------|
| 1                                                                      | 84,661 (6.2)     | 7,496 (8.0)   | 77,165 (6.1)     |
| ≥ 2                                                                    | 2,286 (0.2)      | 267 (0.3)     | 2,019 (0.2)      |
| <b>Delivery type, n (%)</b>                                            |                  |               |                  |
| Vaginal delivery                                                       | 790,232 (58.0)   | 50,272 (53.7) | 739,960 (58.3)   |
| Cesarean section                                                       | 572,287 (42.0)   | 43,432 (46.4) | 528,855 (41.7)   |
| <b>Number of hospital admissions in a year before pregnancy, n (%)</b> |                  |               |                  |
| 0                                                                      | 1,154,236 (84.7) | 74,784 (79.8) | 1,079,452 (85.1) |
| 1                                                                      | 172,545 (12.7)   | 15,119 (16.1) | 157,426 (12.4)   |
| ≥ 2                                                                    | 35,738 (2.6)     | 3,801 (4.1)   | 31,937 (2.5)     |
| <b>Number of outpatient contacts in a year before pregnancy, n (%)</b> |                  |               |                  |
| 0                                                                      | 68,612 (5.0)     | 1,619 (1.7)   | 66,993 (5.3)     |
| 1                                                                      | 69,974 (5.1)     | 2,033 (2.2)   | 67,941 (5.4)     |
| ≥ 2                                                                    | 1,223,933 (89.8) | 90,052 (96.1) | 1,133,881 (89.4) |
| Use of NSAID during pregnancy, n (%)                                   | 254,058 (18.7)   | 44,693 (47.7) | 209,365 (16.5)   |
| Use of acetaminophen during pregnancy, n (%)                           | 406,196 (29.8)   | 64,088 (68.4) | 342,108 (27.0)   |
| <b>Infant characteristics</b>                                          |                  |               |                  |
| <b>Infant sex, n (%)</b>                                               |                  |               |                  |
| Male                                                                   | 702,204 (51.5)   | 48,107 (51.3) | 654,097 (51.6)   |
| Female                                                                 | 660,315 (48.5)   | 45,597 (48.7) | 614,718 (48.5)   |
| <b>Birth season, n (%)</b>                                             |                  |               |                  |
| Spring                                                                 | 310,765 (22.8)   | 19,679 (21.0) | 291,086 (22.9)   |
| Summer                                                                 | 331,734 (24.4)   | 25,338 (27.0) | 306,396 (24.2)   |
| Autumn                                                                 | 375,799 (27.6)   | 26,062 (27.8) | 349,737 (27.6)   |
| Winter                                                                 | 344,221 (25.3)   | 22,625 (24.2) | 321,596 (25.4)   |
| <b>Year of delivery, n (%)</b>                                         |                  |               |                  |
| 2010 to 2012                                                           | 496,610 (36.5)   | 29,185 (31.2) | 467,425 (36.8)   |
| 2013 to 2015                                                           | 545,019 (40.0)   | 38,726 (41.3) | 506,293 (39.9)   |
| 2016 to 2017                                                           | 320,890 (23.6)   | 25,793 (27.5) | 295,097 (23.3)   |
| <b>At-risk newborn, n (%)</b>                                          |                  |               |                  |
| Preterm birth                                                          | 41,862 (3.1)     | 3,994 (4.3)   | 37,868 (3.0)     |
| Low birth weight                                                       | 33,200 (2.4)     | 2,802 (3.0)   | 30,398 (2.4)     |
| <b>Breastfeeding, n (%)</b>                                            |                  |               |                  |
| No                                                                     | 628,014 (46.1)   | 47,267 (50.4) | 580,748 (45.8)   |
| Yes                                                                    | 734,504 (53.9)   | 46,437 (49.6) | 580,748 (45.8)   |

NSAID, nonsteroidal anti-inflammatory drug; SD, standard deviation

**Table S11.** Baseline characteristics of study subjects (PS-matched cohort B, birth date of infants in 2010-2015)

|                           |                                          | Full unmatched cohort (n=2,264,056) <sup>a</sup> |                                    | PS-matched cohort A (n=877,904) <sup>b</sup> |                                    | SMD*  |
|---------------------------|------------------------------------------|--------------------------------------------------|------------------------------------|----------------------------------------------|------------------------------------|-------|
|                           |                                          | Children with prenatal opioid exposure           | Children without prenatal exposure | Children with prenatal opioid exposure       | Children without prenatal exposure |       |
|                           | <b>Total, n</b>                          | 146,858                                          | 2,117,198                          | 146,789                                      | 731,115                            |       |
| <b>Matching variables</b> | <b>Maternal characteristics</b>          |                                                  |                                    |                                              |                                    |       |
|                           | Maternal age at delivery year, mean (SD) | 32.0 (4.1)                                       | 31.7 (4.1)                         | 32.0 (4.1)                                   | 32.0 (4.1)                         | 0.01  |
|                           | Maternal age at delivery year, n (%)     |                                                  |                                    |                                              |                                    | <0.01 |
|                           | ≤ 19                                     | 379 (0.3)                                        | 5,797 (0.3)                        | 376 (0.3)                                    | 1,819 (0.3)                        |       |
|                           | 20-24                                    | 5,802 (4.0)                                      | 96,272 (4.6)                       | 5,796 (4.0)                                  | 28,514 (3.9)                       |       |
|                           | 25-29                                    | 29,773 (20.3)                                    | 483,644 (22.8)                     | 29,761 (20.3)                                | 148,318 (20.3)                     |       |
|                           | 30-34                                    | 73,035 (49.7)                                    | 1,044,582 (49.3)                   | 73,013 (49.7)                                | 364,033 (49.8)                     |       |
|                           | ≥ 35                                     | 37,869 (25.8)                                    | 486,903 (23.0)                     | 37,843 (25.8)                                | 188,431 (25.8)                     |       |
|                           | Region of residence, n (%)               |                                                  |                                    |                                              |                                    | <0.01 |
|                           | Rural                                    | 60,859 (41.4)                                    | 920,131 (43.5)                     | 60,835 (41.4)                                | 302,952 (41.4)                     |       |
|                           | Urban                                    | 85,999 (58.6)                                    | 1,197,067 (56.5)                   | 85,954 (58.6)                                | 428,163 (58.6)                     |       |
|                           | Income level, n (%)                      |                                                  |                                    |                                              |                                    | <0.01 |
|                           | 1st quartile                             | 34,981 (23.8)                                    | 476,057 (22.5)                     | 34,952 (23.8)                                | 173,176 (23.7)                     |       |
|                           | 2nd quartile                             | 38,672 (26.3)                                    | 551,432 (26.1)                     | 38,655 (26.3)                                | 192,737 (26.4)                     |       |
| 3rd quartile              | 36,509 (24.9)                            | 530,381 (25.1)                                   | 36,492 (24.9)                      | 182,018 (24.9)                               |                                    |       |
| 4th quartile              | 36,696 (25.0)                            | 559,328 (26.4)                                   | 36,690 (25.0)                      | 183,184 (25.1)                               |                                    |       |

|                                                                 |                |                  |                |                |       |
|-----------------------------------------------------------------|----------------|------------------|----------------|----------------|-------|
| Parity, n (%)                                                   |                |                  |                |                | <0.01 |
| 1                                                               | 124,459 (84.8) | 1,643,964 (77.7) | 124,401 (84.8) | 620,036 (84.8) |       |
| ≥ 2                                                             | 22,399 (15.3)  | 473,234 (22.4)   | 22,388 (15.3)  | 111,079 (15.2) |       |
| Maternal medical conditions, n (%)                              |                |                  |                |                | 0.01  |
| No mental illness                                               | 113,537 (77.3) | 1,789,943 (84.5) | 113,532 (77.3) | 567,701 (77.6) |       |
| Common                                                          | 29,840 (20.3)  | 296,659 (14.0)   | 29,741 (20.3)  | 150,164 (20.5) |       |
| Severe                                                          | 3,481 (2.4)    | 30,596 (1.5)     | 3,516 (2.4)    | 13,250 (1.8)   |       |
| Severe maternal morbidity, n (%)                                |                |                  |                |                | <0.01 |
| 0                                                               | 134,654 (91.7) | 1,986,819 (93.8) | 134,642 (91.7) | 671,936 (91.9) |       |
| 1                                                               | 11,724 (8.0)   | 126,887 (6.0)    | 11,698 (8.0)   | 57,279 (7.8)   |       |
| ≥ 2                                                             | 480 (0.3)      | 3,492 (0.2)      | 449 (0.3)      | 1,900 (0.3)    |       |
| Number of hospital admissions in a year before pregnancy, n (%) |                |                  |                |                | <0.01 |
| 0                                                               | 118,207 (80.5) | 1,808,567 (85.4) | 118,195 (80.5) | 590,517 (80.8) |       |
| 1                                                               | 23,027 (15.7)  | 260,020 (12.3)   | 23,004 (15.7)  | 114,000 (15.6) |       |
| ≥ 2                                                             | 5,624 (3.8)    | 48,611 (2.3)     | 5,590 (3.8)    | 26,598 (3.6)   |       |
| Number of outpatient contacts in a year before pregnancy, n (%) |                |                  |                |                | <0.01 |
| 0                                                               | 3,337 (2.3)    | 144,636 (6.8)    | 3,331 (2.3)    | 16,590 (2.3)   |       |
| 1                                                               | 3,622 (2.5)    | 125,198 (5.9)    | 3,620 (2.5)    | 18,054 (2.5)   |       |

|                             |                                                            |                |                  |                |                |       |
|-----------------------------|------------------------------------------------------------|----------------|------------------|----------------|----------------|-------|
|                             | ≥ 2                                                        | 139,899 (95.3) | 1,847,364 (87.3) | 139,838 (95.3) | 696,471 (95.3) |       |
|                             | Alcohol or drug misuse, n (%)                              | 294 (0.2)      | 2,194 (0.1)      | 280 (0.2)      | 943 (0.1)      | 0.02  |
|                             | Mood disorders except those with psychotic symptoms, n (%) | 5,208 (3.6)    | 42,490 (2.0)     | 5,171 (3.5)    | 24,317 (3.3)   | 0.01  |
|                             | Anxiety and stress-related disorders, n (%)                | 9,160 (6.2)    | 76,743 (3.6)     | 9,116 (6.2)    | 43,631 (6.0)   | 0.01  |
|                             | Sleep disorders, n (%)                                     | 506 (0.3)      | 5,451 (0.3)      | 4,419 (3.0)    | 20,365 (2.8)   | 0.01  |
|                             | Epilepsy, n (%)                                            | 384 (0.3)      | 3,535 (0.2)      | 491 (0.3)      | 2,019 (0.3)    | 0.01  |
|                             | Other neuropsychiatry disorders, n (%)                     | 4,467 (3.0)    | 32,980 (1.6)     | 379 (0.3)      | 1,417 (0.2)    | 0.01  |
| <b>Unmatching variables</b> | Delivery type, n (%)                                       |                |                  |                |                | 0.15  |
|                             | Vaginal delivery                                           | 81,215 (55.3)  | 1,275,479 (60.2) | 81,185 (55.3)  | 459,279 (62.8) |       |
|                             | Cesarean section                                           | 65,643 (44.7)  | 841,719 (39.8)   | 65,604 (44.7)  | 271,836 (37.2) |       |
|                             | Use of NSAID during pregnancy, n (%)                       | 71,593 (48.8)  | 347,854 (16.4)   | 71,553 (48.8)  | 140,166 (19.2) | 0.66  |
|                             | Use of acetaminophen during pregnancy, n (%)               | 124,822 (85.0) | 695,710 (32.9)   | 124,757 (85.0) | 273,122 (37.4) | 1.12  |
|                             | <b>Infant characteristics</b>                              |                |                  |                |                |       |
|                             | Infant sex, n (%)                                          |                |                  |                |                | <0.01 |
|                             | Male                                                       | 75,203 (51.2)  | 1,087,053 (51.3) | 75,166 (51.2)  | 375,366 (51.3) |       |
|                             | Female                                                     | 71,655 (48.8)  | 1,030,145 (48.7) | 71,623 (48.8)  | 355,749 (48.7) |       |
|                             | Birth season, n (%)                                        |                |                  |                |                | 0.08  |
|                             | Spring                                                     | 35,866 (24.4)  | 545,587 (25.8)   | 35,851 (24.4)  | 186,955 (25.6) |       |
| Summer                      | 39,916 (27.2)                                              | 513,192 (24.2) | 39,890 (27.2)    | 177,840 (24.3) |                |       |

|                         |               |                  |                |                |      |
|-------------------------|---------------|------------------|----------------|----------------|------|
| Autumn                  | 35,515 (24.2) | 529,822 (25.0)   | 35,497 (24.2)  | 186,827 (25.6) |      |
| Winter                  | 35,561 (24.2) | 528,597 (25.0)   | 35,551 (24.2)  | 179,493 (24.6) |      |
| Year of delivery, n (%) |               |                  |                |                | 0.08 |
| 2010 to 2012            | 69,885 (47.6) | 1,119,845 (52.9) | 69,862 (47.6)  | 378,391 (51.8) |      |
| 2013 to 2015            | 76,973 (52.4) | 997,353 (47.1)   | 76,927 (52.4)  | 352,724 (48.2) |      |
| At-risk newborn, n (%)  |               |                  |                |                | 0.07 |
| Preterm birth           | 6,727 (4.6)   | 68,824 (3.3)     | 138,864 (94.6) | 701,930 (96.0) |      |
| Low birth weight        | 4,976 (3.4)   | 55,422 (2.6)     | 7,925 (5.4)    | 29,185 (4.0)   |      |

NSAID, nonsteroidal anti-inflammatory drug; PS, propensity score; SD, standard deviation; SMD, standardized mean difference

<sup>a</sup> PS-matched cohort B consists of infants born between 2010 and 2015, with the exposed and unexposed groups matched in a 1:5 ratio

(Cohort 4 in Figure 1 and Table S8).

\* SMD <0.1 corresponds to no major imbalance

**Table S12.** Interaction analysis of maternal health condition with opioid prescriptions and opioid prescriptions during pregnancy in PS-matched cohort A from 2010 to 2017

|                                                                                                       | n (%)            | Neuropsychiatric disorder events (%) | Person-years | Neuropsychiatric incidence rate* | Hazard ratio (95% CI)      |                            |                            |
|-------------------------------------------------------------------------------------------------------|------------------|--------------------------------------|--------------|----------------------------------|----------------------------|----------------------------|----------------------------|
|                                                                                                       |                  |                                      |              |                                  | Crude                      | Adjusted†                  | Fully adjusted††           |
| Maternal health condition with opioid prescriptions X Opioid prescriptions during pregnancy (p-value) |                  |                                      |              |                                  | P<0.001                    | P<0.001                    | P=0.001                    |
| Maternal health condition with opioid prescriptions                                                   |                  |                                      |              |                                  |                            |                            |                            |
| No                                                                                                    | 1,373,510 (86.4) | 34,499 (3.2)                         | 6,376,813    | 5.4                              | 1 (reference)              | 1 (reference)              | 1 (reference)              |
| Pain to related <sup>a</sup>                                                                          | 62,815 (4.0)     | 2,424 (3.9)                          | 372,087      | 6.5                              | <b>1.21 (1.16 to 1.26)</b> | <b>1.18 (1.14 to 1.23)</b> | <b>1.16 (1.11 to 1.20)</b> |
| Antitussive-related <sup>b</sup>                                                                      | 69,200 (4.4)     | 2,376 (3.4)                          | 416,509      | 5.7                              | <b>1.05 (1.01 to 1.10)</b> | 1.05 (1.00 to 1.09)        | 1.04 (1.00 to 1.09)        |
| Other                                                                                                 | 83,915 (5.3)     | 2,596 (3.1)                          | 483,308      | 5.4                              | 1.00 (0.96 to 1.04)        | 1.01 (0.97 to 1.05)        | 1.01 (0.97 to 1.05)        |

CI, confidence interval; PS, propensity score; SMM, severe maternal morbidity

<sup>a</sup> Pain-related condition includes medical conditions such as neoplasm (benign), diseases of the blood and blood-forming organs and certain disorders involving the immune mechanism, endocrine, nutritional and metabolic diseases, neuropsychiatric disorders, diseases of the nervous system, diseases of the ear and mastoid process, diseases of the circulatory system, diseases of digestive system, diseases of the skin and subcutaneous tissue, diseases of musculoskeletal system and connective tissue, and diseases of the genitourinary system

<sup>b</sup> Antitussive-related condition includes medical conditions such as infectious and parasitic diseases and diseases of the respiratory system

\* Neuropsychiatric incidence rate is expressed per 1,000 person-years

† The adjusted model was adjusted for the following variables: maternal age at delivery years ( $\leq 19$ , 20-24, 25-29, 30-34, and  $\geq 35$  years), infant sex, region of residence (urban and rural), household income level (1st, 2nd, 3rd, and 4th quartiles), birth season (spring, summer, autumn, and winter), parity (1 and  $\geq 2$ ), maternal mental illness, SMM score (0, 1, and  $\geq 2$ ), and hospital outpatient visit (0, 1, and  $\geq 2$ ), and admission contact (0, 1, and  $\geq 2$ ) in a year before pregnancy.

†† The fully adjusted model was adjusted for the following variables: covariates as in the adjusted model, history of maternal neuropsychiatric conditions (alcohol or drug misuse, mood disorders except those with psychotic symptoms, anxiety and stress-related disorders, sleep disorders, epilepsy, and other neuropsychiatry disorders), and use of NSAID and acetaminophen during pregnancy.

Numbers in bold indicate significant differences ( $P < 0.05$ )

**Table S13.** Interaction analysis of opioid prescriptions in a year before pregnancy and opioid prescriptions during pregnancy

|                                                                                                   | n (%)          | Neuropsychiatric disorder events (%) | Person-years | Neuropsychiatric incidence rate* | Hazard ratio (95% CI)      |                            |                            |
|---------------------------------------------------------------------------------------------------|----------------|--------------------------------------|--------------|----------------------------------|----------------------------|----------------------------|----------------------------|
|                                                                                                   |                |                                      |              |                                  | Crude                      | Adjusted†                  | Fully adjusted††           |
| Opioid prescriptions in a year before pregnancy X Opioid prescriptions during pregnancy (p-value) |                |                                      |              |                                  | p=0.001                    | P=0.003                    | P=0.040                    |
| <b>PS-matched cohort A</b>                                                                        |                |                                      |              |                                  |                            |                            |                            |
| Opioid prescriptions in a year before pregnancy                                                   |                |                                      |              |                                  |                            |                            |                            |
| No                                                                                                | 340,154 (26.3) | 1,953 (3.33)                         | 354,785      | 5.5                              | <b>1.08 (1.03 to 1.13)</b> | 1.04 (0.99 to 1.10)        | 1.05 (1.00 to 1.10)        |
| Yes                                                                                               | 951,258 (73.7) | 5,451 (3.46)                         | 917,168      | 5.9                              | <b>1.07 (1.03 to 1.10)</b> | <b>1.08 (1.04 to 1.11)</b> | <b>1.07 (1.04 to 1.10)</b> |
| <b>Child screening cohort</b>                                                                     |                |                                      |              |                                  |                            |                            |                            |
| Opioid prescriptions in a year before pregnancy                                                   |                |                                      |              |                                  |                            |                            |                            |
| No                                                                                                | 655,754 (48.1) | 827 (3.3)                            | 154,111      | 5.4                              | 1.01 (0.95 to 1.09)        | 1.03 (0.96 to 1.11)        | 1.02 (0.95 to 1.10)        |
| Yes                                                                                               | 706,765 (51.9) | 2,269 (3.3)                          | 396,326      | 5.7                              | <b>1.06 (1.02 to 1.11)</b> | <b>1.09 (1.04 to 1.14)</b> | <b>1.06 (1.02 to 1.11)</b> |

CI, confidence interval; PS, propensity score; SMM, severe maternal morbidity

\* Neuropsychiatric incidence rate is expressed per 1,000 person-years

† The adjusted model was adjusted for the following variables: maternal age at delivery years ( $\leq 19$ , 20-24, 25-29, 30-34, and  $\geq 35$  years),

infant sex, region of residence (urban and rural), household income level (1st, 2nd, 3rd, and 4th quartiles), birth season (spring, summer,



autumn, and winter), parity (1 and  $\geq 2$ ), maternal mental illness, SMM score (0, 1, and  $\geq 2$ ), and hospital outpatient visit (0, 1, and  $\geq 2$ ), and admission contact (0, 1, and  $\geq 2$ ) in a year before pregnancy.

†† The fully adjusted model was adjusted for the following variables: covariates as in the adjusted model, history of maternal neuropsychiatric conditions (alcohol or drug misuse, mood disorders except those with psychotic symptoms, anxiety and stress-related disorders, sleep disorders, epilepsy, and other neuropsychiatry disorders), and use of NSAID and acetaminophen during pregnancy.

Numbers in bold indicate significant differences ( $P < 0.05$ )

**Table S14.** Interaction analysis and ratio of hazard ratio of delivery type and opioid prescriptions during pregnancy in PS-matched cohort A

|                                                                 | Hazard ratio (95% CI)      |                            |                            |
|-----------------------------------------------------------------|----------------------------|----------------------------|----------------------------|
|                                                                 | Crude                      | Adjusted†                  | Fully adjusted††           |
| Delivery type X Opioid prescriptions during pregnancy (p-value) | P=0.002                    | P=0.003                    | P=0.009                    |
| Delivery type                                                   |                            |                            |                            |
| Vaginal delivery                                                | 1.03 (1.00 to 1.07)        | 1.04 (1.00 to 1.08)        | 1.04 (1.00 to 1.08)        |
| Cesarean section                                                | <b>1.09 (1.05 to 1.13)</b> | <b>1.13 (1.09 to 1.17)</b> | <b>1.12 (1.08 to 1.17)</b> |
| Ratio of hazard ratio (Cesarean section vs. Vaginal delivery)   | 1.06 (1.00 to 1.11)        | <b>1.09 (1.04 to 1.14)</b> | <b>1.08 (1.03 to 1.14)</b> |

CI, confidence interval; PS, propensity score

PS-matched cohort A, derived from the full unmatched cohort, involves a 1:5 matching ratio and pairs the exposed and unexposed groups in a 1:5 ratio using PS (Cohort 2 in Figure 1 and Table S8).

† The adjusted model was adjusted for the following variables: maternal age at delivery years ( $\leq 19$ , 20-24, 25-29, 30-34, and  $\geq 35$  years), infant sex, region of residence (urban and rural), household income level (1st, 2nd, 3rd, and 4th quartiles), birth season (spring, summer, autumn, and winter), parity (1 and  $\geq 2$ ), maternal mental illness, SMM score (0, 1, and  $\geq 2$ ), and hospital outpatient visit (0, 1, and  $\geq 2$ ), and admission contact (0, 1, and  $\geq 2$ ) in a year before pregnancy.

†† The fully adjusted model was adjusted for the following variables: covariates as in the adjusted model, history of maternal neuropsychiatric conditions (alcohol or drug misuse, mood disorders except those with psychotic symptoms, anxiety and stress-related disorders, sleep disorders, epilepsy, and other neuropsychiatry disorders), and use of NSAID and acetaminophen during pregnancy.

Numbers in bold indicate significant differences ( $P < 0.05$ )

**Table S15.** Summary of main outcome in each cohort

|                                                                        | n (%)            | Neuropsychiatric disorder events (%) | Person-years | Neuropsychiatric incidence rate* | Hazard ratio (95% CI)      |                            |                            |
|------------------------------------------------------------------------|------------------|--------------------------------------|--------------|----------------------------------|----------------------------|----------------------------|----------------------------|
|                                                                        |                  |                                      |              |                                  | Crude                      | Adjusted†                  | Fully adjusted††           |
| <b>Full unmatched cohort</b>                                           |                  |                                      |              |                                  |                            |                            |                            |
| Opioid exposure during pregnancy                                       |                  |                                      |              |                                  |                            |                            |                            |
| No                                                                     | 2,912,559 (93.1) | 98,022 (3.4)                         | 18,203,128   | 5.4                              | 1 (reference)              | 1 (reference)              | 1 (reference)              |
| Yes                                                                    | 216,012 (6.9)    | 7,404 (3.4)                          | 1,272,208    | 5.8                              | <b>1.10 (1.07 to 1.12)</b> | <b>1.12 (1.09 to 1.15)</b> | <b>1.09 (1.07 to 1.12)</b> |
| <b>PS to matched cohort A</b>                                          |                  |                                      |              |                                  |                            |                            |                            |
| Opioid exposure during pregnancy                                       |                  |                                      |              |                                  |                            |                            |                            |
| No                                                                     | 1,075,454 (83.3) | 36,648 (3.4)                         | 6,650,015    | 5.5                              | 1 (reference)              | 1 (reference)              | 1 (reference)              |
| Yes                                                                    | 215,958 (16.7)   | 7,398 (3.4)                          | 1,271,953    | 5.8                              | <b>1.07 (1.04 to 1.10)</b> | <b>1.08 (1.05 to 1.11)</b> | <b>1.07 (1.05 to 1.10)</b> |
| <b>Child screening cohort</b>                                          |                  |                                      |              |                                  |                            |                            |                            |
| Opioid exposure during pregnancy                                       |                  |                                      |              |                                  |                            |                            |                            |
| No                                                                     | 1,268,815 (93.1) | 42,691 (3.4)                         | 7,888,143    | 5.4                              | 1 (reference)              | 1 (reference)              | 1 (reference)              |
| Yes                                                                    | 93,704 (6.9)     | 3,096 (3.3)                          | 550,437      | 5.6                              | <b>1.06 (1.02 to 1.10)</b> | <b>1.08 (1.04 to 1.12)</b> | <b>1.05 (1.01 to 1.09)</b> |
| <b>PS to matched cohort B<br/>(birth date of infants in 2010-2015)</b> |                  |                                      |              |                                  |                            |                            |                            |
| Opioid exposure during pregnancy                                       |                  |                                      |              |                                  |                            |                            |                            |
| No                                                                     | 731,115 (83.3)   | 31,530 (4.3)                         | 5,393,061    | 5.8                              | 1 (reference)              | 1 (reference)              | 1 (reference)              |

|                                                                                |                  |              |           |      |                            |                            |                            |
|--------------------------------------------------------------------------------|------------------|--------------|-----------|------|----------------------------|----------------------------|----------------------------|
| Yes                                                                            | 146,789 (16.7)   | 6,608 (4.5)  | 1,060,207 | 6.2  | <b>1.07 (1.05 to 1.10)</b> | <b>1.08 (1.05 to 1.11)</b> | <b>1.08 (1.05 to 1.10)</b> |
| <b>PS-matched cohort C<br/>(‘outcome’ criteria with<br/>above 1 diagnosis)</b> |                  |              |           |      |                            |                            |                            |
| Opioid exposure during<br>pregnancy                                            |                  |              |           |      |                            |                            |                            |
| No                                                                             | 1,075,454 (83.3) | 64,239 (6.0) | 6,551,602 | 9.8  | 1 (reference)              | 1 (reference)              | 1 (reference)              |
| Yes                                                                            | 215,958 (16.7)   | 12,838 (5.9) | 1,253,736 | 10.2 | <b>1.05 (1.03 to 1.07)</b> | <b>1.05 (1.03 to 1.07)</b> | <b>1.05 (1.03 to 1.07)</b> |
| <b>Sibling cohort A from the<br/>full unmatched cohort</b>                     |                  |              |           |      |                            |                            |                            |
| Opioid exposure during<br>pregnancy                                            |                  |              |           |      |                            |                            |                            |
| No                                                                             | 114,007 (52.0)   | 5,008 (4.4)  | 760,040   | 6.6  | 1 (reference)              | 1 (reference)              | 1 (reference)              |
| Yes                                                                            | 105,339 (48.0)   | 2,754 (2.6)  | 566,329   | 4.9  | <b>0.78 (0.73 to 0.82)</b> | 1.00 (0.93 to 1.07)        | 1.00 (0.93 to 1.07)        |
| <b>Sibling cohort B from the<br/>PS-matched cohort</b>                         |                  |              |           |      |                            |                            |                            |
| Opioid exposure during<br>pregnancy                                            |                  |              |           |      |                            |                            |                            |
| No                                                                             | 47,294 (50.7)    | 2,049 (4.3)  | 303,650   | 6.9  | 1 (reference)              | 1 (reference)              | 1 (reference)              |
| Yes                                                                            | 46,034 (49.3)    | 1,391 (3.0)  | 255,035   | 5.7  | <b>0.89 (0.82 to 0.97)</b> | 1.04 (0.93 to 1.16)        | 1.03 (0.92 to 1.16)        |
| <b>Sibling cohort C from the<br/>child screening cohort</b>                    |                  |              |           |      |                            |                            |                            |
| Opioid exposure during<br>pregnancy                                            |                  |              |           |      |                            |                            |                            |

|     |               |             |         |     |                            |                     |                     |
|-----|---------------|-------------|---------|-----|----------------------------|---------------------|---------------------|
| No  | 21,221 (50.6) | 1,066 (5.0) | 152,981 | 7.0 | 1 (reference)              | 1 (reference)       | 1 (reference)       |
| Yes | 20,699 (49.4) | 585 (2.8)   | 121,848 | 4.8 | <b>0.72 (0.63 to 0.80)</b> | 0.95 (0.82 to 1.12) | 0.95 (0.81 to 1.11) |

CI, confidence interval; PS, propensity-score; SMM, severe maternal morbidity

\* Neuropsychiatric incidence rate is expressed per 1,000 person-years

† The adjusted model was adjusted for the following variables: maternal age at delivery years ( $\leq 19$ , 20-24, 25-29, 30-34, and  $\geq 35$  years), infant sex, region of residence (urban and rural), household income level (1st, 2nd, 3rd, and 4th quartiles), birth season (spring, summer, autumn, and winter), parity (1 and  $\geq 2$ ), maternal mental illness, SMM score (0, 1, and  $\geq 2$ ), and hospital outpatient visit (0, 1, and  $\geq 2$ ), and admission contact (0, 1, and  $\geq 2$ ) in a year before pregnancy.

†† The fully adjusted model was adjusted for the following variables: covariates as in the adjusted model, history of maternal neuropsychiatric conditions (alcohol or drug misuse, mood disorders except those with psychotic symptoms, anxiety and stress-related disorders, sleep disorders, epilepsy, and other neuropsychiatry disorders), and use of NSAID and acetaminophen during pregnancy.

Numbers in bold indicate significant differences ( $P < 0.05$ )

**Table S16.** Hazard ratio models of the association between prenatal opioid exposure during pregnancy and neuropsychiatric disorders in children with the 1:5 PS-matched cohort B (birth date of infants in 2010-2015)

|                                  | n (%)          | Neuropsychiatric disorder events (%) | Person-years | Neuropsychiatric incidence rate* | Hazard ratio (95% CI)      |                            |                            |
|----------------------------------|----------------|--------------------------------------|--------------|----------------------------------|----------------------------|----------------------------|----------------------------|
|                                  |                |                                      |              |                                  | Crude                      | Adjusted†                  | Fully adjusted††           |
| Opioid exposure during pregnancy |                |                                      |              |                                  |                            |                            |                            |
| No                               | 731,115 (83.3) | 31,530 (4.3)                         | 5,393,061    | 5.8                              | 1 (reference)              | 1 (reference)              | 1 (reference)              |
| Yes                              | 146,789 (16.7) | 6,608 (4.5)                          | 1,060,207    | 6.2                              | <b>1.07 (1.05 to 1.10)</b> | <b>1.08 (1.05 to 1.11)</b> | <b>1.08 (1.05 to 1.10)</b> |
| Timing of opioid exposure        |                |                                      |              |                                  |                            |                            |                            |
| No opioid exposure               | 731,115 (83.3) | 31,530 (4.3)                         | 5,393,061    | 5.8                              | 1 (reference)              | 1 (reference)              | 1 (reference)              |
| First trimester only             | 61,802 (7.0)   | 2,980 (4.8)                          | 454,469      | 6.6                              | <b>1.13 (1.09 to 1.17)</b> | <b>1.10 (1.06 to 1.15)</b> | <b>1.10 (1.06 to 1.14)</b> |
| Second trimester only            | 33,552 (3.8)   | 1,414 (4.2)                          | 238,224      | 5.9                              | 1.03 (0.97 to 1.08)        | 1.04 (0.99 to 1.10)        | 1.04 (0.99 to 1.10)        |
| Third trimester only             | 40,710 (4.6)   | 1,663 (4.1)                          | 291,804      | 5.7                              | 0.98 (0.93 to 1.02)        | 1.02 (0.97 to 1.07)        | 1.02 (0.97 to 1.07)        |
| More than one trimester          | 10,725 (1.2)   | 551 (5.1)                            | 75,710       | 7.3                              | <b>1.26 (1.16 to 1.37)</b> | <b>1.29 (1.19 to 1.41)</b> | <b>1.25 (1.15 to 1.36)</b> |
| Dose-dependent association, MME  |                |                                      |              |                                  |                            |                            |                            |
| None                             | 731,115 (83.3) | 31,530 (4.3)                         | 5,393,061    | 5.8                              | 1 (reference)              | 1 (reference)              | 1 (reference)              |
| Low-dose user                    | 120,776 (13.8) | 5,203 (4.3)                          | 868,733      | 6.0                              | 1.03 (1.00 to 1.06)        | <b>1.04 (1.01 to 1.08)</b> | <b>1.05 (1.02 to 1.08)</b> |
| High to dose user                | 26,013 (3.0)   | 1,405 (5.4)                          | 191,474      | 7.3                              | <b>1.26 (1.19 to 1.33)</b> | <b>1.23 (1.17 to 1.30)</b> | <b>1.20 (1.13 to 1.26)</b> |
| Opioid prescriptions, days       |                |                                      |              |                                  |                            |                            |                            |
| 0                                | 731,115 (83.3) | 31,530 (4.3)                         | 5,393,061    | 5.8                              | 1 (reference)              | 1 (reference)              | 1 (reference)              |
| 1-29                             | 144,926 (16.5) | 6,489 (4.5)                          | 1,047,344    | 6.2                              | <b>1.07 (1.04 to 1.10)</b> | <b>1.07 (1.04 to 1.10)</b> | <b>1.07 (1.04 to 1.10)</b> |
| 30-59                            | 1,702 (0.2)    | 100 (5.9)                            | 11,789       | 8.5                              | <b>1.47 (1.21 to 1.79)</b> | <b>1.52 (1.25 to 1.84)</b> | <b>1.42 (1.17 to 1.73)</b> |
| ≥60                              | 161 (0.0)      | 19 (11.8)                            | 1,074        | 17.7                             | <b>3.14 (2.00 to 4.92)</b> | <b>3.12 (1.99 to 4.88)</b> | <b>2.40 (1.53 to 3.76)</b> |

| Number of opioid prescriptions |                |              |           |     |                            |                            |                            |
|--------------------------------|----------------|--------------|-----------|-----|----------------------------|----------------------------|----------------------------|
| 0-1                            | 731,115 (83.3) | 31,530 (4.3) | 5,393,061 | 5.8 | 1 (reference)              | 1 (reference)              | 1 (reference)              |
| 2                              | 72,363 (8.2)   | 3,105 (4.3)  | 526,608   | 5.9 | 1.01 (0.98 to 1.05)        | 1.01 (0.97 to 1.05)        | 1.02 (0.98 to 1.05)        |
| ≥ 3                            | 74,426 (8.5)   | 3,503 (4.7)  | 533,599   | 6.6 | <b>1.13 (1.09 to 1.17)</b> | <b>1.15 (1.11 to 1.19)</b> | <b>1.13 (1.10 to 1.17)</b> |

CI, confidence interval; MME, morphine milligram equivalent; PS, propensity-score; SMM, severe maternal morbidity

\* Neuropsychiatric incidence rate is expressed per 1,000 person-years

† The adjusted model was adjusted for the following variables: maternal age at delivery years ( $\leq 19$ , 20-24, 25-29, 30-34, and  $\geq 35$  years), infant sex, region of residence (urban and rural), household income level (1st, 2nd, 3rd, and 4th quartiles), birth season (spring, summer, autumn, and winter), parity (1 and  $\geq 2$ ), maternal mental illness, SMM score (0, 1, and  $\geq 2$ ), and hospital outpatient visit (0, 1, and  $\geq 2$ ), and admission contact (0, 1, and  $\geq 2$ ) in a year before pregnancy.

†† The fully adjusted model was adjusted for the following variables: covariates as in the adjusted model, history of maternal neuropsychiatric conditions (alcohol or drug misuse, mood disorders except those with psychotic symptoms, anxiety and stress-related disorders, sleep disorders, epilepsy, and other neuropsychiatry disorders), and use of NSAID and acetaminophen during pregnancy.

Numbers in bold indicate significant differences ( $P < 0.05$ )



**Table S17.** Hazard ratio models of the association between prenatal opioid exposure during pregnancy and neuropsychiatric disorders in children with the 1:5 PS-matched cohort C from 2010 to 2017 ('outcome' criteria with above 1 diagnosis)

|                                  | n (%)            | Neuropsychiatric disorder events (%) | Person-years | Neuropsychiatric incidence rate* | Hazard ratio (95% CI)      |                            |                            |
|----------------------------------|------------------|--------------------------------------|--------------|----------------------------------|----------------------------|----------------------------|----------------------------|
|                                  |                  |                                      |              |                                  | Crude                      | Adjusted†                  | Fully adjusted††           |
| Opioid exposure during pregnancy |                  |                                      |              |                                  |                            |                            |                            |
| No                               | 1,075,454 (83.3) | 64,239 (6.0)                         | 6,551,602    | 9.8                              | 1 (reference)              | 1 (reference)              | 1 (reference)              |
| Yes                              | 215,958 (16.7)   | 12,838 (5.9)                         | 1,253,736    | 10.2                             | <b>1.05 (1.03 to 1.07)</b> | <b>1.05 (1.03 to 1.07)</b> | <b>1.05 (1.03 to 1.07)</b> |
| Timing of opioid exposure        |                  |                                      |              |                                  |                            |                            |                            |
| No opioid exposure               | 1,075,454 (83.3) | 64,239 (6.0)                         | 6,551,602    | 9.8                              | 1 (reference)              | 1 (reference)              | 1 (reference)              |
| First trimester only             | 87,567 (6.8)     | 5,650 (6.5)                          | 524,839      | 10.8                             | <b>1.11 (1.08 to 1.14)</b> | <b>1.08 (1.06 to 1.11)</b> | <b>1.08 (1.05 to 1.11)</b> |
| Second trimester only            | 50,765 (3.9)     | 2,898 (5.7)                          | 286,792      | 10.1                             | 1.04 (1.00 to 1.08)        | <b>1.04 (1.01 to 1.08)</b> | <b>1.05 (1.01 to 1.08)</b> |
| Third trimester only             | 61,122 (4.7)     | 3,297 (5.4)                          | 349,889      | 9.4                              | 0.96 (0.93 to 0.99)        | 0.99 (0.96 to 1.03)        | 0.99 (0.96 to 1.03)        |
| More than one trimester          | 16,504 (1.3)     | 993 (6.0)                            | 92,216       | 10.8                             | <b>1.11 (1.04 to 1.18)</b> | <b>1.13 (1.06 to 1.20)</b> | <b>1.10 (1.03 to 1.17)</b> |
| Dose-dependent association, MME  |                  |                                      |              |                                  |                            |                            |                            |
| None                             | 1,075,454 (83.3) | 64,239 (6.0)                         | 6,551,602    | 9.8                              | 1 (reference)              | 1 (reference)              | 1 (reference)              |
| Low-dose user                    | 161,695 (12.5)   | 9,892 (6.1)                          | 986,154      | 10.0                             | 1.02 (1.00 to 1.05)        | <b>1.03 (1.01 to 1.05)</b> | <b>1.03 (1.01 to 1.05)</b> |
| High-dose user                   | 54,263 (4.2)     | 2,946 (5.4)                          | 267,582      | 11.0                             | <b>1.16 (1.12 to 1.21)</b> | <b>1.14 (1.10 to 1.18)</b> | <b>1.12 (1.08 to 1.16)</b> |
| Opioid prescriptions, days       |                  |                                      |              |                                  |                            |                            |                            |
| 0                                | 1,075,454 (83.3) | 64,239 (6.0)                         | 6,551,602    | 9.8                              | 1 (reference)              | 1 (reference)              | 1 (reference)              |
| 1-29                             | 212,839 (16.5)   | 12,634 (5.9)                         | 1,237,295    | 10.2                             | <b>1.05 (1.03 to 1.07)</b> | <b>1.05 (1.03 to 1.07)</b> | <b>1.05 (1.03 to 1.07)</b> |
| 30-59                            | 2,824 (0.2)      | 178 (6.3)                            | 14,995       | 11.9                             | <b>1.23 (1.06 to 1.43)</b> | <b>1.26 (1.08 to 1.45)</b> | <b>1.19 (1.02 to 1.37)</b> |
| ≥60                              | 295 (0.0)        | 26 (8.8)                             | 1,446        | 18.0                             | <b>1.91 (1.30 to 2.80)</b> | <b>1.87 (1.27 to 2.74)</b> | <b>1.51 (1.03 to 2.22)</b> |

| Number of opioid prescriptions |                  |              |           |      |                            |                            |                            |
|--------------------------------|------------------|--------------|-----------|------|----------------------------|----------------------------|----------------------------|
| 0-1                            | 1,075,454 (83.3) | 64,239 (6.0) | 6,551,602 | 9.8  | 1 (reference)              | 1 (reference)              | 1 (reference)              |
| 2                              | 104,991 (8.1)    | 6,164 (5.9)  | 617,476   | 10.0 | 1.02 (1.00 to 1.05)        | 1.02 (0.99 to 1.04)        | 1.02 (1.00 to 1.05)        |
| ≥ 3                            | 110,967 (8.6)    | 6,674 (6.0)  | 636,260   | 10.5 | <b>1.08 (1.05 to 1.11)</b> | <b>1.09 (1.06 to 1.11)</b> | <b>1.08 (1.05 to 1.10)</b> |

CI, confidence interval; MME, morphine milligram equivalent; PS, propensity-score; SMM, severe maternal morbidity

\* Neuropsychiatric incidence rate is expressed per 1,000 person-years

† The adjusted model was adjusted for the following variables: maternal age at delivery years ( $\leq 19$ , 20-24, 25-29, 30-34, and  $\geq 35$  years), infant sex, region of residence (urban and rural), household income level (1st, 2nd, 3rd, and 4th quartiles), birth season (spring, summer, autumn, and winter), parity (1 and  $\geq 2$ ), maternal mental illness, SMM score (0, 1, and  $\geq 2$ ), and hospital outpatient visit (0, 1, and  $\geq 2$ ), and admission contact (0, 1, and  $\geq 2$ ) in a year before pregnancy.

†† The fully adjusted model was adjusted for the following variables: covariates as in the adjusted model, history of maternal neuropsychiatric conditions (alcohol or drug misuse, mood disorders except those with psychotic symptoms, anxiety and stress-related disorders, sleep disorders, epilepsy, and other neuropsychiatry disorders), and use of NSAID and acetaminophen during pregnancy.

Numbers in bold indicate significant differences ( $P < 0.05$ )

**Table S18.** Hazard ratio model of the association between prenatal opioid exposure during pregnancy and specific neuropsychiatric disorders in children within the 1:5 PS-matched cohort A from 2010 to 2017

|                                                         | n (%)            | Neuropsychiatric disorder events (%) | Crude hazard ratio (95% CI) |
|---------------------------------------------------------|------------------|--------------------------------------|-----------------------------|
| Alcohol or drug misuse                                  |                  |                                      |                             |
| No opioid exposure                                      | 1,075,454 (83.3) | 94 (0.0)                             | 1 (reference)               |
| Opioid exposure                                         | 215,958 (16.7)   | 15 (0.0)                             | 0.80 (0.47 to 1.38)         |
| Mood disorders, excluding those with psychotic symptoms |                  |                                      |                             |
| No opioid exposure                                      | 1,075,454 (83.3) | 2,594 (0.2)                          | 1 (reference)               |
| Opioid exposure                                         | 215,958 (16.7)   | 535 (0.3)                            | <b>1.13 (1.03 to 1.24)</b>  |
| Anxiety and stress-related disorders                    |                  |                                      |                             |
| No opioid exposure                                      | 1,075,454 (83.3) | 4,772 (0.4)                          | 1 (reference)               |
| Opioid exposure                                         | 215,958 (16.7)   | 932 (0.4)                            | 1.06 (0.98 to 1.13)         |
| Eating disorders                                        |                  |                                      |                             |
| No opioid exposure                                      | 1,075,454 (83.3) | 157 (0.0)                            | 1 (reference)               |
| Opioid exposure                                         | 215,958 (16.7)   | 21 (0.0)                             | 0.68 (0.43 to 1.08)         |
| Compulsive disorders                                    |                  |                                      |                             |
| No opioid exposure                                      | 1,075,454 (83.3) | 379 (0.0)                            | 1 (reference)               |
| Opioid exposure                                         | 215,958 (16.7)   | 56 (0.0)                             | 0.81 (0.62 to 1.08)         |
| ADHD                                                    |                  |                                      |                             |
| No opioid exposure                                      | 1,075,454 (83.3) | 12,170 (1.1)                         | 1 (reference)               |
| Opioid exposure                                         | 215,958 (16.7)   | 2,452 (1.1)                          | <b>1.10 (1.05 to 1.15)</b>  |
| ASD                                                     |                  |                                      |                             |

|                                  |                  |              |                            |
|----------------------------------|------------------|--------------|----------------------------|
| No opioid exposure               | 1,075,454 (83.3) | 5,533 (0.5)  | 1 (reference)              |
| Opioid exposure                  | 215,958 (16.7)   | 1,072 (0.5)  | 0.99 (0.93 to 1.06)        |
| Intellectual disability          |                  |              |                            |
| No opioid exposure               | 1,075,454 (83.3) | 3,554 (0.3)  | 1 (reference)              |
| Opioid exposure                  | 215,958 (16.7)   | 864 (0.4)    | <b>1.27 (1.18 to 1.37)</b> |
| Common neuropsychiatric disorder |                  |              |                            |
| No opioid exposure               | 1,075,454 (83.3) | 35,294 (3.3) | 1 (reference)              |
| Opioid exposure                  | 215,958 (16.7)   | 7,080 (3.3)  | <b>1.06 (1.04 to 1.09)</b> |
| Severe neuropsychiatric disorder |                  |              |                            |
| No opioid exposure               | 1,075,454 (83.3) | 1,354 (0.1)  | 1 (reference)              |
| Opioid exposure                  | 215,958 (16.7)   | 318 (0.2)    | <b>1.26 (1.12 to 1.42)</b> |

ADHD, attention-deficit hyperactivity disorder; ASD, autism spectrum disorder; CI, confidence interval; PS, propensity score

Numbers in bold indicate significant differences ( $P < 0.05$ )

**Table S19.** Hazard ratio models of the association between prenatal opioid exposure during pregnancy and neuropsychiatric disorders in children with the full unmatched cohort from 2010 to 2017

|                                  | n (%)            | Neuropsychiatric disorder events (%) | Person-years | Neuropsychiatric incidence rate* | Hazard ratio (95% CI)      |                            |                            |
|----------------------------------|------------------|--------------------------------------|--------------|----------------------------------|----------------------------|----------------------------|----------------------------|
|                                  |                  |                                      |              |                                  | Crude                      | Adjusted†                  | Fully adjusted††           |
| Opioid exposure during pregnancy |                  |                                      |              |                                  |                            |                            |                            |
| No                               | 2,912,559 (93.1) | 98,022 (3.4)                         | 18,203,128   | 5.5                              | 1 (reference)              | 1 (reference)              | 1 (reference)              |
| Yes                              | 216,012 (6.9)    | 7,404 (3.4)                          | 1,272,208    | 5.8                              | <b>1.10 (1.07 to 1.12)</b> | <b>1.12 (1.09 to 1.15)</b> | <b>1.09 (1.07 to 1.12)</b> |
| Timing of opioid exposure        |                  |                                      |              |                                  |                            |                            |                            |
| No opioid exposure               | 2,912,559 (93.1) | 98,022 (3.4)                         | 18,203,128   | 5.5                              | 1 (reference)              | 1 (reference)              | 1 (reference)              |
| First trimester only             | 87,596 (2.8)     | 3,331 (3.8)                          | 533,104      | 6.3                              | <b>1.18 (1.14 to 1.22)</b> | <b>1.16 (1.12 to 1.21)</b> | <b>1.13 (1.10 to 1.17)</b> |
| Second trimester only            | 50,779 (1.6)     | 1,600 (3.2)                          | 291,047      | 5.5                              | 1.04 (0.99 to 1.10)        | <b>1.07 (1.02 to 1.13)</b> | 1.05 (1.00 to 1.11)        |
| Third trimester only             | 61,129 (2.0)     | 1,863 (3.1)                          | 354,619      | 5.3                              | 0.98 (0.94 to 1.03)        | 1.04 (1.00 to 1.09)        | 1.03 (0.98 to 1.08)        |
| More than one trimester          | 16,508 (0.5)     | 610 (3.7)                            | 93,438       | 6.5                              | <b>1.24 (1.15 to 1.34)</b> | <b>1.30 (1.20 to 1.40)</b> | <b>1.22 (1.13 to 1.32)</b> |
| Dose-dependent association, MME  |                  |                                      |              |                                  |                            |                            |                            |
| None                             | 2,912,559 (93.1) | 98,022 (3.4)                         | 18,203,128   | 5.4                              | 1 (reference)              | 1 (reference)              | 1 (reference)              |
| Low-dose user                    | 161,724 (5.2)    | 5,733 (3.5)                          | 1,000,669    | 5.7                              | <b>1.07 (1.04 to 1.10)</b> | <b>1.16 (1.12 to 1.21)</b> | <b>1.08 (1.05 to 1.10)</b> |
| High-dose user                   | 54,288 (1.7)     | 1,671 (3.1)                          | 271,539      | 6.2                              | <b>1.21 (1.15 to 1.27)</b> | <b>1.07 (1.02 to 1.13)</b> | <b>1.16 (1.11 to 1.22)</b> |
| Opioid prescriptions, days       |                  |                                      |              |                                  |                            |                            |                            |
| 0                                | 2,912,559 (93.1) | 98,022 (3.4)                         | 18,203,128   | 5.4                              | 1 (reference)              | 1 (reference)              | 1 (reference)              |
| 1-29                             | 212,892 (6.8)    | 7,272 (3.4)                          | 1,255,536    | 5.8                              | <b>1.09 (1.07 to 1.12)</b> | <b>1.11 (1.09 to 1.14)</b> | <b>1.09 (1.06 to 1.12)</b> |
| 30-59                            | 2,825 (0.1)      | 113 (4.0)                            | 15,199       | 7.4                              | <b>1.43 (1.19 to 1.72)</b> | <b>1.50 (1.24 to 1.80)</b> | <b>1.36 (1.13 to 1.64)</b> |
| ≥60                              | 295 (0.0)        | 19 (6.4)                             | 1,473        | 12.9                             | <b>2.59 (1.66 to 4.05)</b> | <b>2.59 (1.66 to 4.05)</b> | <b>1.92 (1.22 to 3.00)</b> |

| Number of opioid prescriptions |                  |              |            |     |                            |                            |                            |
|--------------------------------|------------------|--------------|------------|-----|----------------------------|----------------------------|----------------------------|
| 0-1                            | 2,912,559 (93.1) | 98,022 (3.4) | 18,203,128 | 5.4 | 1 (reference)              | 1 (reference)              | 1 (reference)              |
| 2                              | 105,007 (3.4)    | 3,510 (3.3)  | 626,670    | 5.6 | <b>1.05 (1.02 to 1.09)</b> | <b>1.07 (1.03 to 1.10)</b> | <b>1.05 (1.02 to 1.09)</b> |
| ≥ 3                            | 111,005 (3.6)    | 3,894 (3.5)  | 645,538    | 6.0 | <b>1.14 (1.10 to 1.18)</b> | <b>1.17 (1.14 to 1.21)</b> | <b>1.14 (1.10 to 1.17)</b> |

CI, confidence interval; MME, morphine milligram equivalent; SMM, severe maternal morbidity

\* Neuropsychiatric incidence rate is expressed per 1,000 person-years

† The adjusted model was adjusted for the following variables: maternal age at delivery years ( $\leq 19$ , 20-24, 25-29, 30-34, and  $\geq 35$  years), infant sex, region of residence (urban and rural), household income level (1st, 2nd, 3rd, and 4th quartiles), birth season (spring, summer, autumn, and winter), parity (1 and  $\geq 2$ ), maternal mental illness, SMM score (0, 1, and  $\geq 2$ ), and hospital outpatient visit (0, 1, and  $\geq 2$ ), and admission contact (0, 1, and  $\geq 2$ ) in a year before pregnancy.

†† The fully adjusted model was adjusted for the following variables: covariates as in the adjusted model, history of maternal neuropsychiatric conditions (alcohol or drug misuse, mood disorders except those with psychotic symptoms, anxiety and stress-related disorders, sleep disorders, epilepsy, and other neuropsychiatry disorders), and use of NSAID and acetaminophen during pregnancy.

Numbers in bold indicate significant differences ( $P < 0.05$ )

**Table S20.** Stratification analysis for hazard ratio models of the association between opioid exposure during pregnancy and neuropsychiatric disorders in children with the full unmatched cohort from 2010 to 2017

|                                                     | n (%)         | Neuropsychiatric disorder events (%) | Person-years | Neuropsychiatric incidence rate* | Hazard ratio (95% CI)      |                            |                            |
|-----------------------------------------------------|---------------|--------------------------------------|--------------|----------------------------------|----------------------------|----------------------------|----------------------------|
|                                                     |               |                                      |              |                                  | Crude                      | Adjusted†                  | Fully adjusted††           |
| <b>Maternal parameters</b>                          |               |                                      |              |                                  |                            |                            |                            |
| Maternal medical conditions                         |               |                                      |              |                                  |                            |                            |                            |
| No mental illness                                   | 168,482 (6.4) | 4,437 (2.6)                          | 989,760      | 4.5                              | 1.02 (0.99 to 1.05)        | <b>1.05 (1.02 to 1.08)</b> | <b>1.05 (1.02 to 1.08)</b> |
| Mental illness                                      | 47,530 (9.8)  | 2,967 (6.2)                          | 282,448      | 10.5                             | 1.01 (0.98 to 1.05)        | <b>1.05 (1.01 to 1.09)</b> | <b>1.05 (1.01 to 1.09)</b> |
| Delivery type                                       |               |                                      |              |                                  |                            |                            |                            |
| Vaginal delivery                                    | 115,193 (6.4) | 3,723 (3.2)                          | 695,853      | 5.4                              | <b>1.08 (1.04 to 1.11)</b> | <b>1.08 (1.04 to 1.11)</b> | <b>1.06 (1.02 to 1.09)</b> |
| Cesarean section                                    | 100,819 (7.6) | 3,681 (3.7)                          | 576,355      | 6.4                              | <b>1.10 (1.06 to 1.14)</b> | <b>1.19 (1.15 to 1.23)</b> | <b>1.16 (1.12 to 1.20)</b> |
| Alcohol or drug misuse                              |               |                                      |              |                                  |                            |                            |                            |
| No                                                  | 215,454 (6.9) | 7,344 (3.4)                          | 1,269,636    | 5.8                              | <b>1.09 (1.07 to 1.12)</b> | <b>1.12 (1.09 to 1.14)</b> | <b>1.09 (1.06 to 1.12)</b> |
| Yes                                                 | 558 (12.5)    | 60 (10.8)                            | 2,572        | 23.3                             | <b>2.15 (1.61 to 2.86)</b> | <b>2.06 (1.54 to 2.75)</b> | <b>2.03 (1.52 to 2.72)</b> |
| Mood disorders except those with psychotic symptoms |               |                                      |              |                                  |                            |                            |                            |
| No                                                  | 206,313 (6.8) | 6,861 (3.3)                          | 1,224,798    | 5.6                              | <b>1.08 (1.05 to 1.10)</b> | <b>1.10 (1.08 to 1.13)</b> | <b>1.09 (1.06 to 1.12)</b> |
| Yes                                                 | 9,699 (11.6)  | 543 (5.6)                            | 47,410       | 11.5                             | <b>1.14 (1.04 to 1.25)</b> | <b>1.16 (1.06 to 1.27)</b> | <b>1.14 (1.05 to 1.25)</b> |
| Anxiety and stress-related disorders                |               |                                      |              |                                  |                            |                            |                            |
| No                                                  | 199,817 (6.7) | 6,648 (3.3)                          | 1,190,217    | 5.6                              | <b>1.07 (1.05 to 1.10)</b> | <b>1.10 (1.07 to 1.13)</b> | <b>1.09 (1.06 to 1.12)</b> |
| Yes                                                 | 16,195 (11.1) | 756 (4.7)                            | 81,991       | 9.2                              | <b>1.12 (1.04 to 1.21)</b> | <b>1.14 (1.06 to 1.23)</b> | <b>1.11 (1.03 to 1.20)</b> |
| Sleep disorders                                     |               |                                      |              |                                  |                            |                            |                            |
| No                                                  | 215,128 (6.9) | 7,338 (3.4)                          | 1,267,784    | 5.8                              | <b>1.09 (1.07 to 1.12)</b> | <b>1.12 (1.09 to 1.14)</b> | <b>1.09 (1.07 to 1.12)</b> |

|                                       |                |             |           |      |                            |                            |                            |
|---------------------------------------|----------------|-------------|-----------|------|----------------------------|----------------------------|----------------------------|
| Yes                                   | 884 (9.2)      | 66 (7.5)    | 4,424     | 14.9 | <b>1.40 (1.09 to 1.81)</b> | <b>1.44 (1.11 to 1.86)</b> | <b>1.36 (1.05 to 1.76)</b> |
| Epilepsy                              |                |             |           |      |                            |                            |                            |
| No                                    | 215,198 (6.9)  | 7,337 (3.4) | 1,268,593 | 5.8  | <b>1.09 (1.07 to 1.12)</b> | <b>1.12 (1.09 to 1.14)</b> | <b>1.09 (1.07 to 1.12)</b> |
| Yes                                   | 814 (10.8)     | 67 (8.2)    | 3,615     | 18.5 | <b>1.43 (1.10 to 1.84)</b> | <b>1.43 (1.10 to 1.85)</b> | <b>1.41 (1.09 to 1.83)</b> |
| Other neuropsychiatry disorders       |                |             |           |      |                            |                            |                            |
| No                                    | 207,620 (6.8)  | 6,968 (3.4) | 1,231,523 | 5.7  | <b>1.08 (1.05 to 1.10)</b> | <b>1.10 (1.08 to 1.13)</b> | <b>1.09 (1.06 to 1.11)</b> |
| Yes                                   | 8,392 (12.4)   | 436 (5.2)   | 40,685    | 10.7 | <b>1.22 (1.11 to 1.36)</b> | <b>1.22 (1.10 to 1.35)</b> | <b>1.20 (1.08 to 1.33)</b> |
| Use of NSAID during pregnancy         |                |             |           |      |                            |                            |                            |
| No                                    | 112,100 (4.4)  | 3,420 (3.1) | 652,079   | 5.2  | 1.02 (0.98 to 1.05)        | <b>1.06 (1.02 to 1.10)</b> | <b>1.04 (1.01 to 1.08)</b> |
| Yes                                   | 103,912 (17.7) | 3,984 (3.8) | 620,129   | 6.4  | <b>1.07 (1.03 to 1.10)</b> | <b>1.08 (1.05 to 1.12)</b> | <b>1.06 (1.03 to 1.10)</b> |
| Use of acetaminophen during pregnancy |                |             |           |      |                            |                            |                            |
| No                                    | 67,988 (3.1)   | 1,443 (2.1) | 295,341   | 4.9  | 1.04 (0.98 to 1.09)        | <b>1.08 (1.03 to 1.14)</b> | <b>1.06 (1.01 to 1.12)</b> |
| Yes                                   | 148,024 (15.8) | 5,961 (4.0) | 976,867   | 6.1  | <b>1.05 (1.02 to 1.08)</b> | <b>1.07 (1.04 to 1.10)</b> | <b>1.05 (1.03 to 1.08)</b> |
| <b>Infantal parameters</b>            |                |             |           |      |                            |                            |                            |
| Infant sex                            |                |             |           |      |                            |                            |                            |
| Male                                  | 110,511 (6.9)  | 5,144 (4.7) | 647,888   | 7.9  | <b>1.08 (1.05 to 1.11)</b> | <b>1.10 (1.07 to 1.14)</b> | <b>1.08 (1.05 to 1.11)</b> |
| Female                                | 105,501 (6.9)  | 2,260 (2.1) | 624,320   | 3.6  | <b>1.14 (1.09 to 1.19)</b> | <b>1.16 (1.11 to 1.21)</b> | <b>1.13 (1.08 to 1.18)</b> |
| Birth season                          |                |             |           |      |                            |                            |                            |
| Spring                                | 53,228 (6.6)   | 1,731 (3.3) | 308,353   | 5.6  | <b>1.12 (1.06 to 1.17)</b> | <b>1.15 (1.10 to 1.21)</b> | <b>1.12 (1.07 to 1.18)</b> |
| Summer                                | 58,458 (7.6)   | 2,066 (3.5) | 346,044   | 6.0  | <b>1.11 (1.06 to 1.16)</b> | <b>1.13 (1.08 to 1.18)</b> | <b>1.10 (1.06 to 1.15)</b> |
| Autumn                                | 51,697 (6.7)   | 1,839 (3.6) | 307,273   | 6.0  | <b>1.07 (1.02 to 1.12)</b> | <b>1.09 (1.04 to 1.14)</b> | <b>1.06 (1.01 to 1.11)</b> |
| Winter                                | 52,629 (6.7)   | 1,768 (3.4) | 310,538   | 5.7  | <b>1.09 (1.04 to 1.15)</b> | <b>1.12 (1.06 to 1.17)</b> | <b>1.09 (1.04 to 1.15)</b> |



| Year of delivery            |               |             |           |      |                            |                            |                            |
|-----------------------------|---------------|-------------|-----------|------|----------------------------|----------------------------|----------------------------|
| 2010-2012                   | 69,885 (5.9)  | 4,318 (6.2) | 605,044   | 7.1  | <b>1.16 (1.12 to 1.19)</b> | <b>1.15 (1.12 to 1.19)</b> | <b>1.13 (1.10 to 1.17)</b> |
| 2013-2015                   | 76,973 (7.2)  | 2,303 (3.0) | 455,601   | 5.1  | <b>1.06 (1.02 to 1.11)</b> | <b>1.08 (1.04 to 1.13)</b> | <b>1.05 (1.01 to 1.10)</b> |
| 2016-2017                   | 69,154 (8.0)  | 783 (1.1)   | 211,563   | 3.7  | 1.02 (0.94 to 1.09)        | 1.07 (0.99 to 1.15)        | 1.03 (0.96 to 1.11)        |
| Medical condition of infant |               |             |           |      |                            |                            |                            |
| None                        | 203,225 (6.8) | 6,695 (3.3) | 1,202,495 | 5.6  | <b>1.08 (1.05 to 1.11)</b> | <b>1.10 (1.08 to 1.13)</b> | <b>1.08 (1.05 to 1.11)</b> |
| At-risk newborn             | 12,787 (8.9)  | 709 (5.5)   | 69,713    | 10.2 | <b>1.15 (1.06 to 1.24)</b> | <b>1.17 (1.09 to 1.27)</b> | <b>1.14 (1.05 to 1.23)</b> |

CI, confidence interval; NSAID, nonsteroidal anti-inflammatory drug; MME, morphine milligram equivalent; SMM, severe maternal morbidity

\* Neuropsychiatric incidence rate is expressed per 1,000 person-years

† The adjusted model was adjusted for the following variables: maternal age at delivery years ( $\leq 19$ , 20-24, 25-29, 30-34, and  $\geq 35$  years), infant sex, region of residence (urban and rural), household income level (1st, 2nd, 3rd, and 4th quartiles), birth season (spring, summer, autumn, and winter), parity (1 and  $\geq 2$ ), maternal mental illness, SMM score (0, 1, and  $\geq 2$ ), and hospital outpatient visit (0, 1, and  $\geq 2$ ), and admission contact (0, 1, and  $\geq 2$ ) in a year before pregnancy.

†† The fully adjusted model was adjusted for the following variables: covariates as in the adjusted model, history of maternal neuropsychiatric conditions (alcohol or drug misuse, mood disorders except those with psychotic symptoms, anxiety and stress-related disorders, sleep disorders, epilepsy, and other neuropsychiatry disorders), and use of NSAID and acetaminophen during pregnancy.

Numbers in bold indicate significant differences ( $P < 0.05$ )

**Table S21.** Adjusted hazard ratio models of the dose-dependence between prenatal opioid exposure during pregnancy and specific neuropsychiatric disorders in children within the full unmatched cohort from 2010 to 2017

|                                                         | Overall                |                            |                              | Low-dose users (<25.5 MME) |                            |                              | High-dose users (≥25.5 MME) |                            |                              |
|---------------------------------------------------------|------------------------|----------------------------|------------------------------|----------------------------|----------------------------|------------------------------|-----------------------------|----------------------------|------------------------------|
|                                                         | Events, n (%)          | Adjusted HR (95% CI)†      | Fully adjusted HR (95% CI)†† | Events, n (%)              | Adjusted HR (95% CI)†      | Fully adjusted HR (95% CI)†† | Events, n (%)               | Adjusted HR (95% CI)†      | Fully adjusted HR (95% CI)†† |
| Alcohol or drug misuse                                  |                        |                            |                              |                            |                            |                              |                             |                            |                              |
| No opioid exposure                                      | 242/2,912,559 (0.0)    | 1 (reference)              | 1 (reference)                | 242/2,912,559 (0.0)        | 1 (reference)              | 1 (reference)                | 242/2,912,559 (0.0)         | 1 (reference)              | 1 (reference)                |
| Opioid exposure                                         | 15/216,012 (0.0)       | 0.85 (0.50 to 1.44)        | 0.83 (0.49 to 1.41)          | 14/161,724 (0.0)           | 1.04 (0.61 to 1.79)        | 1.03 (0.60 to 1.76)          | 1/54,288 (0.0)              | 0.24 (0.03 to 1.69)        | 0.23 (0.03 to 1.65)          |
| Mood disorders, excluding those with psychotic symptoms |                        |                            |                              |                            |                            |                              |                             |                            |                              |
| No opioid exposure                                      | 6,526/2,912,559 (0.2)  | 1 (reference)              | 1 (reference)                | 6,526/2,912,559 (0.2)      | 1 (reference)              | 1 (reference)                | 6,526/2,912,559 (0.2)       | 1 (reference)              | 1 (reference)                |
| Opioid exposure                                         | 535/216,012 (0.2)      | <b>1.28 (1.18 to 1.40)</b> | <b>1.24 (1.13 to 1.35)</b>   | 418/161,724 (0.3)          | <b>1.25 (1.13 to 1.38)</b> | <b>1.21 (1.10 to 1.34)</b>   | 117/54,288 (0.2)            | <b>1.43 (1.19 to 1.72)</b> | <b>1.33 (1.11 to 1.60)</b>   |
| Anxiety and stress-related disorders                    |                        |                            |                              |                            |                            |                              |                             |                            |                              |
| No opioid exposure                                      | 12,495/2,912,559 (0.4) | 1 (reference)              | 1 (reference)                | 12,495/2,912,559 (0.4)     | 1 (reference)              | 1 (reference)                | 12,495/2,912,559 (0.4)      | 1 (reference)              | 1 (reference)                |

|                         |                        |                            |                            |                        |                            |                            |                        |                            |                            |
|-------------------------|------------------------|----------------------------|----------------------------|------------------------|----------------------------|----------------------------|------------------------|----------------------------|----------------------------|
| Opioid exposure         | 934/216,012 (0.4)      | <b>1.13 (1.06 to 1.21)</b> | <b>1.09 (1.02 to 1.17)</b> | 734/161,724 (0.5)      | <b>1.12 (1.04 to 1.20)</b> | <b>1.09 (1.01 to 1.17)</b> | 200/54,288 (0.4)       | <b>1.22 (1.06 to 1.40)</b> | 1.13 (0.98 to 1.30)        |
| Eating disorders        |                        |                            |                            |                        |                            |                            |                        |                            |                            |
| No opioid exposure      | 430/2,912,559 (0.0)    | 1 (reference)              | 1 (reference)              | 430/2,912,559 (0.0)    | 1 (reference)              | 1 (reference)              | 430/2,912,559 (0.0)    | 1 (reference)              | 1 (reference)              |
| Opioid exposure         | 21/216,012 (0.0)       | 0.75 (0.48 to 1.16)        | 0.73 (0.47 to 1.13)        | 16/161,724 (0.0)       | 0.72 (0.44 to 1.18)        | 0.70 (0.43 to 1.16)        | 5/54,288 (0.0)         | 0.88 (0.36 to 2.13)        | 0.82 (0.34 to 1.99)        |
| Compulsive disorders    |                        |                            |                            |                        |                            |                            |                        |                            |                            |
| No opioid exposure      | 948/2,912,559 (0.0)    | 1 (reference)              | 1 (reference)              | 948/2,912,559 (0.0)    | 1 (reference)              | 1 (reference)              | 948/2,912,559 (0.0)    | 1 (reference)              | 1 (reference)              |
| Opioid exposure         | 56/216,012 (0.0)       | 0.93 (0.71 to 1.22)        | 0.90 (0.69 to 1.18)        | 42/161,724 (0.0)       | 0.86 (0.63 to 1.18)        | 0.84 (0.62 to 1.15)        | 14/54,288 (0.0)        | 1.22 (0.72 to 2.06)        | 1.14 (0.67 to 1.93)        |
| ADHD                    |                        |                            |                            |                        |                            |                            |                        |                            |                            |
| No opioid exposure      | 31,573/2,912,559 (1.1) | 1 (reference)              | 1 (reference)              | 31,573/2,912,559 (1.1) | 1 (reference)              | 1 (reference)              | 31,573/2,912,559 (1.1) | 1 (reference)              | 1 (reference)              |
| Opioid exposure         | 2,455/216,012 (1.1)    | <b>1.20 (1.15 to 1.25)</b> | <b>1.17 (1.12 to 1.22)</b> | 1,954/161,724 (1.2)    | <b>1.19 (1.14 to 1.24)</b> | <b>1.16 (1.11 to 1.22)</b> | 501/54,288 (0.9)       | <b>1.27 (1.16 to 1.38)</b> | <b>1.20 (1.09 to 1.31)</b> |
| ASD                     |                        |                            |                            |                        |                            |                            |                        |                            |                            |
| No opioid exposure      | 15,329/2,912,559 (0.5) | 1 (reference)              | 1 (reference)              | 15,329/2,912,559 (0.5) | 1 (reference)              | 1 (reference)              | 15,329/2,912,559 (0.5) | 1 (reference)              | 1 (reference)              |
| Opioid exposure         | 1,073/216,012 (0.5)    | 1.02 (0.96 to 1.08)        | 1.00 (0.94 to 1.06)        | 818/161,724 (0.5)      | 0.99 (0.92 to 1.06)        | 0.98 (0.91 to 1.05)        | 255/54,288 (0.5)       | 1.12 (0.99 to 1.27)        | 1.09 (0.96 to 1.23)        |
| Intellectual disability |                        |                            |                            |                        |                            |                            |                        |                            |                            |

|                                  |                           |                            |                            |                             |                            |                            |                           |                            |                            |
|----------------------------------|---------------------------|----------------------------|----------------------------|-----------------------------|----------------------------|----------------------------|---------------------------|----------------------------|----------------------------|
| No opioid exposure               | 9,514/2,912,559<br>(0.3)  | 1 (reference)              | 1 (reference)              | 9,514/2,912,559<br>(0.3)    | 1 (reference)              | 1 (reference)              | 9,514/2,912,559<br>(0.3)  | 1 (reference)              | 1 (reference)              |
| Opioid exposure                  | 865/216,012 (0.4)         | <b>1.35 (1.26 to 1.45)</b> | <b>1.32 (1.23 to 1.42)</b> | 651/161,724 (0.4)           | <b>1.27 (1.18 to 1.38)</b> | <b>1.25 (1.16 to 1.36)</b> | 214/54,288 (0.4)          | <b>1.68 (1.47 to 1.93)</b> | <b>1.61 (1.40 to 1.84)</b> |
| Common neuropsychiatric disorder |                           |                            |                            |                             |                            |                            |                           |                            |                            |
| No opioid exposure               | 94,544/2,909,081<br>(3.2) | 1 (reference)              | 1 (reference)              | 94,544/2,909,081<br>(3.2)   | 1 (reference)              | 1 (reference)              | 94,544/2,909,081<br>(3.2) | 1 (reference)              | 1 (reference)              |
| Opioid exposure                  | 7,085/215,693<br>(3.3)    | <b>1.11 (1.08 to 1.14)</b> | <b>1.09 (1.06 to 1.11)</b> | 5,479/161,470<br>(3.4)      | <b>1.08 (1.05 to 1.11)</b> | <b>1.07 (1.04 to 1.10)</b> | 1,606/54,223<br>(3.0)     | <b>1.22 (1.16 to 1.28)</b> | <b>1.16 (1.10 to 1.22)</b> |
| Severe neuropsychiatric disorder |                           |                            |                            |                             |                            |                            |                           |                            |                            |
| No opioid exposure               | 3,478/2,818,015<br>(0.1)  | 1 (reference)              | 1 (reference)              | 3,478/2,818,015<br>(0.0012) | 1 (reference)              | 1 (reference)              | 3,478/2,818,015<br>(0.1)  | 1 (reference)              | 1 (reference)              |
| Opioid exposure                  | 319/208,927 (0.2)         | <b>1.40 (1.25 to 1.57)</b> | <b>1.35 (1.21 to 1.52)</b> | 254/156,245<br>(0.0016)     | <b>1.39 (1.22 to 1.58)</b> | <b>1.35 (1.19 to 1.54)</b> | 65/52,682 (0.1)           | <b>1.46 (1.14 to 1.87)</b> | <b>1.37 (1.07 to 1.75)</b> |

ADHD, attention-deficit hyperactivity disorder; ASD, autism spectrum disorder; CI, confidence interval; HR, hazard ratio; MME, morphine milligram equivalents; SMM, severe maternal morbidity

† The adjusted model was adjusted for the following variables: maternal age at delivery years ( $\leq 19$ , 20-24, 25-29, 30-34, and  $\geq 35$  years), infant sex, region of residence (urban and rural), household income level (1st, 2nd, 3rd, and 4th quartiles), birth season (spring, summer,

autumn, and winter), parity (1 and  $\geq 2$ ), maternal mental illness, SMM score (0, 1, and  $\geq 2$ ), and hospital outpatient visit (0, 1, and  $\geq 2$ ), and admission contact (0, 1, and  $\geq 2$ ) in a year before pregnancy.

†† The fully adjusted model was adjusted for the following variables: covariates as in the adjusted model, history of maternal neuropsychiatric conditions (alcohol or drug misuse, mood disorders except those with psychotic symptoms, anxiety and stress-related disorders, sleep disorders, epilepsy, and other neuropsychiatry disorders), and use of NSAID and acetaminophen during pregnancy.

Numbers in bold indicate significant differences ( $P < 0.05$ )

**Table S22.** Hazard ratio model of the association between prenatal opioid exposure during pregnancy and specific neuropsychiatric disorders in children within the full unmatched cohort from 2010 to 2017

|                                                         | <b>n (%)</b>     | <b>Neuropsychiatric disorder events (%)</b> | <b>Crude hazard ratio (95% CI)</b> |
|---------------------------------------------------------|------------------|---------------------------------------------|------------------------------------|
| Alcohol or drug misuse                                  |                  |                                             |                                    |
| No opioid exposure                                      | 2,912,559 (93.1) | 242 (0.0)                                   | 1 (reference)                      |
| Opioid exposure                                         | 216,012 (6.9)    | 15 (0.0)                                    | 0.85 (0.50 to 1.43)                |
| Mood disorders, excluding those with psychotic symptoms |                  |                                             |                                    |
| No opioid exposure                                      | 2,912,559 (93.1) | 6,526 (0.2)                                 | 1 (reference)                      |
| Opioid exposure                                         | 216,012 (6.9)    | 535 (0.2)                                   | <b>1.25 (1.14 to 1.36)</b>         |
| Anxiety and stress-related disorders                    |                  |                                             |                                    |
| No opioid exposure                                      | 2,912,559 (93.1) | 12,495 (0.4)                                | 1 (reference)                      |
| Opioid exposure                                         | 216,012 (6.9)    | 934 (0.4)                                   | <b>1.11 (1.04 to 1.19)</b>         |
| Eating disorders                                        |                  |                                             |                                    |
| No opioid exposure                                      | 2,912,559 (93.1) | 430 (0.0)                                   | 1 (reference)                      |
| Opioid exposure                                         | 216,012 (6.9)    | 21 (0.0)                                    | 0.68 (0.44 to 1.05)                |
| Compulsive disorders                                    |                  |                                             |                                    |
| No opioid exposure                                      | 2,912,559 (93.1) | 948 (0.0)                                   | 1 (reference)                      |
| Opioid exposure                                         | 216,012 (6.9)    | 56 (0.0)                                    | 0.91 (0.69 to 1.19)                |
| ADHD                                                    |                  |                                             |                                    |
| No opioid exposure                                      | 2,912,559 (93.1) | 31,573 (1.1)                                | 1 (reference)                      |
| Opioid exposure                                         | 216,012 (6.9)    | 2,455 (1.1)                                 | <b>1.17 (1.13 to 1.22)</b>         |
| ASD                                                     |                  |                                             |                                    |
| No opioid exposure                                      | 2,912,559 (93.1) | 15,329 (0.5)                                | 1 (reference)                      |

|                                  |                  |              |                            |
|----------------------------------|------------------|--------------|----------------------------|
| Opioid exposure                  | 216,012 (6.9)    | 1,073 (0.5)  | 0.97 (0.91 to 1.03)        |
| Intellectual disability          |                  |              |                            |
| No opioid exposure               | 2,912,559 (93.1) | 9,514 (0.3)  | 1 (reference)              |
| Opioid exposure                  | 216,012 (6.9)    | 865 (0.4)    | <b>1.29 (1.21 to 1.39)</b> |
| Common neuropsychiatric disorder |                  |              |                            |
| No opioid exposure               | 2,912,559 (93.1) | 94,544 (3.2) | 1 (reference)              |
| Opioid exposure                  | 216,012 (6.9)    | 7,085 (3.3)  | <b>1.09 (1.06 to 1.12)</b> |
| Severe neuropsychiatric disorder |                  |              |                            |
| No opioid exposure               | 2,912,559 (93.1) | 3,478 (0.1)  | 1 (reference)              |
| Opioid exposure                  | 216,012 (6.9)    | 319 (0.2)    | <b>1.35 (1.21 to 1.52)</b> |

ADHD, attention-deficit hyperactivity disorder; ASD, autism spectrum disorder; CI, confidence interval

Numbers in bold indicate significant differences ( $P < 0.05$ )

**Table S23.** Hazard ratio models of the association between prenatal opioid exposure during pregnancy and neuropsychiatric disorders in children with the child screening cohort from 2010 to 2017

|                                  | n (%)            | Neuropsychiatric disorder events (%) | Person-years | Neuropsychiatric incidence rate* | Hazard ratio (95% CI)      |                            |                            |
|----------------------------------|------------------|--------------------------------------|--------------|----------------------------------|----------------------------|----------------------------|----------------------------|
|                                  |                  |                                      |              |                                  | Crude                      | Adjusted†                  | Fully adjusted††           |
| Opioid exposure during pregnancy |                  |                                      |              |                                  |                            |                            |                            |
| No                               | 1,268,815 (93.1) | 42,691 (3.4)                         | 7,888,143    | 5.4                              | 1 (reference)              | 1 (reference)              | 1 (reference)              |
| Yes                              | 93,704 (6.9)     | 3,096 (3.3)                          | 550,437      | 5.6                              | <b>1.06 (1.02 to 1.10)</b> | <b>1.08 (1.04 to 1.12)</b> | <b>1.05 (1.01 to 1.09)</b> |
| Timing of opioid exposure        |                  |                                      |              |                                  |                            |                            |                            |
| No opioid exposure               | 1,268,815 (93.1) | 42,691 (3.4)                         | 7,888,143    | 5.4                              | 1 (reference)              | 1 (reference)              | 1 (reference)              |
| First trimester only             | 38,456 (2.8)     | 1,378 (3.6)                          | 229,509      | 6.0                              | <b>1.13 (1.07 to 1.19)</b> | <b>1.12 (1.06 to 1.18)</b> | <b>1.09 (1.03 to 1.15)</b> |
| Second trimester only            | 22,141 (1.6)     | 685 (3.1)                            | 128,347      | 5.3                              | 1.00 (0.93 to 1.08)        | 1.02 (0.95 to 1.10)        | 1.01 (0.93 to 1.09)        |
| Third trimester only             | 26,058 (1.9)     | 783 (3.0)                            | 152,491      | 5.1                              | 0.95 (0.89 to 1.02)        | 1.01 (0.94 to 1.09)        | 1.00 (0.93 to 1.07)        |
| More than one trimester          | 7,049 (0.5)      | 250 (3.6)                            | 40,090       | 6.2                              | <b>1.18 (1.04 to 1.33)</b> | <b>1.23 (1.08 to 1.39)</b> | <b>1.16 (1.03 to 1.32)</b> |
| Dose-dependent association, MME  |                  |                                      |              |                                  |                            |                            |                            |
| None                             | 1,268,815 (93.1) | 42,691 (3.4)                         | 7,888,143    | 5.4                              | 1 (reference)              | 1 (reference)              | 1 (reference)              |
| Low-dose user                    | 69,123 (5.1)     | 2,446 (3.5)                          | 436,461      | 5.6                              | 1.03 (0.99 to 1.08)        | <b>1.05 (1.01 to 1.10)</b> | 1.04 (0.99 to 1.08)        |
| High-dose user                   | 24,581 (1.8)     | 650 (2.6)                            | 113,976      | 5.7                              | <b>1.15 (1.06 to 1.24)</b> | <b>1.17 (1.08 to 1.26)</b> | <b>1.12 (1.03 to 1.21)</b> |
| Opioid prescriptions, days       |                  |                                      |              |                                  |                            |                            |                            |
| 0                                | 1,268,815 (93.1) | 42,691 (3.5)                         | 7,888,143    | 5.4                              | 1 (reference)              | 1 (reference)              | 1 (reference)              |
| 1-29                             | 92,447 (6.8)     | 3,049 (3.3)                          | 543,644      | 5.6                              | <b>1.05 (1.02 to 1.09)</b> | <b>1.07 (1.03 to 1.11)</b> | <b>1.05 (1.01 to 1.09)</b> |
| 30-59                            | 1,145 (0.1)      | 41 (3.6)                             | 6,229        | 6.6                              | 1.26 (0.93 to 1.71)        | 1.32 (0.97 to 1.79)        | 1.19 (0.88 to 1.62)        |
| ≥60                              | 112 (0.0)        | 6 (5.4)                              | 564          | 10.6                             | 2.11 (0.95 to 4.69)        | 2.12 (0.95 to 4.72)        | 1.69 (0.76 to 3.76)        |
| Number of opioid prescriptions   |                  |                                      |              |                                  |                            |                            |                            |



|     |                  |              |           |     |                            |                            |                            |
|-----|------------------|--------------|-----------|-----|----------------------------|----------------------------|----------------------------|
| 0-1 | 1,268,815 (93.1) | 42,691 (3.4) | 7,888,143 | 5.4 | 1 (reference)              | 1 (reference)              | 1 (reference)              |
| 2   | 45,821 (3.4)     | 1,460 (3.2)  | 272,449   | 5.5 | 1.00 (0.95 to 1.06)        | 1.01 (0.96 to 1.07)        | 1.00 (0.95 to 1.05)        |
| ≥ 3 | 47,883 (3.5)     | 1,636 (3.4)  | 277,988   | 5.9 | <b>1.11 (1.05 to 1.16)</b> | <b>1.14 (1.08 to 1.20)</b> | <b>1.10 (1.05 to 1.16)</b> |

CI, confidence interval; MME, morphine milligram equivalent; SMM, severe maternal morbidity

\* Neuropsychiatric incidence rate is expressed per 1,000 person-years

† The adjusted model was adjusted for the following variables: maternal age at delivery years ( $\leq 19$ , 20-24, 25-29, 30-34, and  $\geq 35$  years), infant sex, region of residence (urban and rural), household income level (1st, 2nd, 3rd, and 4th quartiles), birth season (spring, summer, autumn, and winter), parity (1 and  $\geq 2$ ), maternal mental illness, SMM score (0, 1, and  $\geq 2$ ), and hospital outpatient visit (0, 1, and  $\geq 2$ ), and admission contact (0, 1, and  $\geq 2$ ) in a year before pregnancy.

†† The fully adjusted model was adjusted for the following variables: covariates as in the adjusted model, history of maternal neuropsychiatric conditions (alcohol or drug misuse, mood disorders except those with psychotic symptoms, anxiety and stress-related disorders, sleep disorders, epilepsy, and other neuropsychiatry disorders), and use of NSAID and acetaminophen during pregnancy.

Numbers in bold indicate significant differences ( $P < 0.05$ )

**Table S24.** Stratification analysis for hazard ratio models of the association between opioid exposure during pregnancy and neuropsychiatric disorders in children with the child screening cohort from 2010 to 2017

|                                                     | n (%)        | Neuropsychiatric disorder events (%) | Person-years | Neuropsychiatric incidence rate* | Hazard ratio (95% CI)      |                            |                            |
|-----------------------------------------------------|--------------|--------------------------------------|--------------|----------------------------------|----------------------------|----------------------------|----------------------------|
|                                                     |              |                                      |              |                                  | Crude                      | Adjusted†                  | Fully adjusted††           |
| <b>Maternal parameters</b>                          |              |                                      |              |                                  |                            |                            |                            |
| Maternal medical conditions                         |              |                                      |              |                                  |                            |                            |                            |
| No mental illness                                   | 73,757 (6.4) | 1,893 (2.6)                          | 432,479      | 4.4                              | 0.99 (0.95 to 1.04)        | 1.02 (0.97 to 1.07)        | 1.02 (0.97 to 1.07)        |
| Mental illness                                      | 19,947 (9.6) | 1,203 (6.0)                          | 117,958      | 10.2                             | 0.96 (0.90 to 1.02)        | 0.99 (0.93 to 1.05)        | 0.99 (0.93 to 1.05)        |
| Delivery type                                       |              |                                      |              |                                  |                            |                            |                            |
| Vaginal delivery                                    | 50,272 (6.4) | 1,595 (3.2)                          | 305,211      | 5.2                              | 1.04 (0.99 to 1.09)        | 1.03 (0.98 to 1.09)        | 1.02 (0.96 to 1.07)        |
| Cesarean section                                    | 43,432 (7.6) | 1,501 (3.5)                          | 245,226      | 6.1                              | <b>1.06 (1.01 to 1.12)</b> | <b>1.15 (1.09 to 1.21)</b> | <b>1.12 (1.06 to 1.18)</b> |
| Alcohol or drug misuse                              |              |                                      |              |                                  |                            |                            |                            |
| No                                                  | 93,489 (6.9) | 3,077 (3.3)                          | 549,461      | 5.6                              | <b>1.05 (1.02 to 1.09)</b> | <b>1.07 (1.03 to 1.11)</b> | <b>1.05 (1.01 to 1.09)</b> |
| Yes                                                 | 215 (12.2)   | 19 (8.8)                             | 976          | 19.5                             | <b>2.02 (1.23 to 3.34)</b> | <b>1.97 (1.19 to 3.28)</b> | <b>2.01 (1.21 to 3.35)</b> |
| Mood disorders except those with psychotic symptoms |              |                                      |              |                                  |                            |                            |                            |
| No                                                  | 89,720 (6.8) | 2,884 (3.2)                          | 531,154      | 5.4                              | 1.04 (1.00 to 1.08)        | <b>1.06 (1.02 to 1.10)</b> | <b>1.05 (1.01 to 1.09)</b> |
| Yes                                                 | 3,984 (11.1) | 212 (5.3)                            | 19,283       | 11.0                             | 1.07 (0.92 to 1.23)        | 1.11 (0.96 to 1.28)        | 1.10 (0.95 to 1.27)        |
| Anxiety and stress-related disorders                |              |                                      |              |                                  |                            |                            |                            |
| No                                                  | 86,819 (6.7) | 2,800 (3.2)                          | 515,652      | 5.4                              | 1.04 (1.00 to 1.08)        | <b>1.06 (1.02 to 1.11)</b> | <b>1.05 (1.01 to 1.09)</b> |
| Yes                                                 | 6,885 (10.7) | 296 (4.3)                            | 34,785       | 8.5                              | 1.02 (0.91 to 1.16)        | 1.04 (0.92 to 1.18)        | 1.03 (0.91 to 1.16)        |
| Sleep disorders                                     |              |                                      |              |                                  |                            |                            |                            |
| No                                                  | 93,397 (6.9) | 3,075 (3.3)                          | 549,154      | 5.6                              | <b>1.06 (1.02 to 1.09)</b> | <b>1.07 (1.03 to 1.11)</b> | <b>1.05 (1.01 to 1.09)</b> |

|                                       |               |             |         |      |                            |                            |                            |
|---------------------------------------|---------------|-------------|---------|------|----------------------------|----------------------------|----------------------------|
| Yes                                   | 307 (9.7)     | 21 (6.8)    | 1,283   | 16.4 | 1.35 (0.86 to 2.12)        | 1.30 (0.82 to 2.07)        | 1.29 (0.81 to 2.05)        |
| Epilepsy                              |               |             |         |      |                            |                            |                            |
| No                                    | 90,162 (6.8)  | 2,917 (3.2) | 533,415 | 5.5  | 1.04 (1.00 to 1.08)        | <b>1.06 (1.02 to 1.10)</b> | <b>1.05 (1.01 to 1.09)</b> |
| Yes                                   | 3,542 (12.2)  | 179 (5.1)   | 17,022  | 10.5 | 1.14 (0.97 to 1.33)        | 1.15 (0.98 to 1.34)        | 1.14 (0.98 to 1.34)        |
| Other neuropsychiatry disorders       |               |             |         |      |                            |                            |                            |
| No                                    | 93,326 (6.9)  | 3,070 (3.3) | 548,603 | 5.6  | <b>1.05 (1.02 to 1.09)</b> | <b>1.07 (1.03 to 1.11)</b> | <b>1.05 (1.01 to 1.09)</b> |
| Yes                                   | 378 (9.2)     | 26 (6.9)    | 1,834   | 14.2 | 1.39 (0.93 to 2.09)        | 1.44 (0.95 to 2.18)        | 1.35 (0.89 to 2.05)        |
| Use of NSAID during pregnancy         |               |             |         |      |                            |                            |                            |
| No                                    | 49,011 (4.4)  | 1,500 (3.1) | 287,307 | 5.2  | 1.00 (0.95 to 1.05)        | 1.04 (0.98 to 1.09)        | 1.02 (0.97 to 1.08)        |
| Yes                                   | 44,693 (17.6) | 1,596 (3.6) | 263,130 | 6.1  | 1.02 (0.97 to 1.08)        | 1.04 (0.98 to 1.09)        | 1.02 (0.96 to 1.07)        |
| Use of acetaminophen during pregnancy |               |             |         |      |                            |                            |                            |
| No                                    | 29,616 (3.1)  | 537 (1.8)   | 118,857 | 4.5  | 0.99 (0.91 to 1.08)        | 1.03 (0.94 to 1.12)        | 1.01 (0.93 to 1.10)        |
| Yes                                   | 64,088 (15.8) | 2,559 (4.0) | 431,580 | 5.9  | 1.00 (0.96 to 1.05)        | 1.03 (0.98 to 1.07)        | 1.01 (0.97 to 1.06)        |
| <b>Infantal parameters</b>            |               |             |         |      |                            |                            |                            |
| Infant sex                            | 48,107 (6.9)  | 2,149 (4.5) | 281,305 | 7.6  | 1.03 (0.99 to 1.08)        | 1.05 (1.00 to 1.10)        | 1.03 (0.98 to 1.07)        |
| Male                                  | 45,597 (6.9)  | 947 (2.1)   | 269,132 | 3.5  | <b>1.12 (1.05 to 1.20)</b> | <b>1.14 (1.07 to 1.22)</b> | <b>1.11 (1.04 to 1.18)</b> |
| Female                                |               |             |         |      |                            |                            |                            |
| Birth season                          | 19,679 (6.3)  | 653 (3.3)   | 120,467 | 5.4  | 1.05 (0.97 to 1.14)        | 1.09 (1.00 to 1.18)        | 1.06 (0.98 to 1.15)        |
| Spring                                | 25,338 (7.6)  | 843 (3.3)   | 146,686 | 5.8  | 1.06 (0.99 to 1.14)        | <b>1.09 (1.02 to 1.17)</b> | 1.07 (0.99 to 1.15)        |
| Summer                                | 26,062 (6.9)  | 846 (3.3)   | 148,570 | 5.7  | 1.03 (0.96 to 1.11)        | 1.05 (0.98 to 1.12)        | 1.02 (0.95 to 1.10)        |
| Autumn                                | 22,625 (6.6)  | 754 (3.3)   | 134,714 | 5.6  | 1.07 (0.99 to 1.15)        | <b>1.08 (1.01 to 1.17)</b> | 1.06 (0.99 to 1.14)        |
| Winter                                |               |             |         |      |                            |                            |                            |

|                             |              |             |         |     |                            |                            |                            |
|-----------------------------|--------------|-------------|---------|-----|----------------------------|----------------------------|----------------------------|
| Year of delivery            | 29,185 (5.9) | 1,670 (5.7) | 244,091 | 6.8 | <b>1.10 (1.05 to 1.15)</b> | <b>1.10 (1.04 to 1.15)</b> | <b>1.08 (1.02 to 1.13)</b> |
| 2010-2012                   | 38,726 (7.1) | 1,285 (3.3) | 246,139 | 5.2 | 1.06 (1.00 to 1.12)        | <b>1.08 (1.02 to 1.14)</b> | 1.05 (0.99 to 1.11)        |
| 2013-2015                   | 25,793 (8.0) | 141 (0.6)   | 60,207  | 2.3 | 0.83 (0.70 to 0.98)        | 0.87 (0.73 to 1.03)        | 0.84 (0.71 to 1.00)        |
| 2016-2017                   | 48,107 (6.9) | 2,149 (4.5) | 281,305 | 7.6 | 1.03 (0.99 to 1.08)        | 1.05 (1.00 to 1.10)        | 1.03 (0.98 to 1.07)        |
| Medical condition of infant |              |             |         |     |                            |                            |                            |
| None                        | 88,927 (6.8) | 2,879 (3.2) | 524,939 | 5.5 | <b>1.05 (1.01 to 1.09)</b> | <b>1.07 (1.03 to 1.11)</b> | <b>1.05 (1.01 to 1.09)</b> |
| At-risk newborn             | 4,777 (8.9)  | 217 (4.5)   | 25,498  | 8.5 | 1.06 (0.92 to 1.22)        | 1.09 (0.95 to 1.25)        | 1.05 (0.91 to 1.21)        |
| Breastfeeding               |              |             |         |     |                            |                            |                            |
| No                          | 47,267 (7.5) | 1,567 (3.3) | 252,732 | 6.2 | 1.05 (0.99 to 1.10)        | <b>1.07 (1.02 to 1.13)</b> | 1.04 (0.99 to 1.10)        |
| Yes                         | 46,437 (6.3) | 1,529 (3.3) | 297,705 | 5.1 | 1.05 (0.99 to 1.10)        | <b>1.07 (1.01 to 1.12)</b> | 1.05 (0.99 to 1.10)        |

CI, confidence interval; NSAID, nonsteroidal anti-inflammatory drug; MME, morphine milligram equivalent; SMM, severe maternal morbidity

\* Neuropsychiatric incidence rate is expressed per 1,000 person-years

† The adjusted model was adjusted for the following variables: maternal age at delivery years ( $\leq 19$ , 20-24, 25-29, 30-34, and  $\geq 35$  years), infant sex, region of residence (urban and rural), household income level (1st, 2nd, 3rd, and 4th quartiles), birth season (spring, summer, autumn, and winter), parity (1 and  $\geq 2$ ), maternal mental illness, SMM score (0, 1, and  $\geq 2$ ), and hospital outpatient visit (0, 1, and  $\geq 2$ ), and admission contact (0, 1, and  $\geq 2$ ) in a year before pregnancy.

†† The fully adjusted model was adjusted for the following variables: covariates as in the adjusted model, history of maternal neuropsychiatric conditions (alcohol or drug misuse, mood disorders except those with psychotic symptoms, anxiety and stress-related disorders, sleep disorders, epilepsy, and other neuropsychiatry disorders), and use of NSAID and acetaminophen during pregnancy.

Numbers in bold indicate significant differences ( $P < 0.05$ )

**Table S25.** Adjusted hazard ratio models of the dose-dependence between prenatal opioid exposure during pregnancy and specific neuropsychiatric disorders in children within the child screening cohort from 2010 to 2017

|                                                         | Overall               |                                   |                                          | Low-dose users (<25.5 MME) |                                   |                                          | High-dose users (≥25.5 MME) |                                   |                                          |
|---------------------------------------------------------|-----------------------|-----------------------------------|------------------------------------------|----------------------------|-----------------------------------|------------------------------------------|-----------------------------|-----------------------------------|------------------------------------------|
|                                                         | Events, n (%)         | Adjusted HR (95% CI) <sup>†</sup> | Fully adjusted HR (95% CI) <sup>††</sup> | Events, n (%)              | Adjusted HR (95% CI) <sup>†</sup> | Fully adjusted HR (95% CI) <sup>††</sup> | Events, n (%)               | Adjusted HR (95% CI) <sup>†</sup> | Fully adjusted HR (95% CI) <sup>††</sup> |
| Alcohol or drug misuse                                  |                       |                                   |                                          |                            |                                   |                                          |                             |                                   |                                          |
| No opioid exposure                                      | 111/1,268,815 (0.0)   | 1 (reference)                     | 1 (reference)                            | 111/1,268,815 (0.0)        | 1 (reference)                     | 1 (reference)                            | 111/1,268,815 (0.0)         | 1 (reference)                     | 1 (reference)                            |
| Opioid exposure                                         | 4/93,704 (0.0)        | 0.51 (0.19 to 1.37)               | 0.50 (0.18 to 1.35)                      | 4/69,123 (0.0)             | 0.67 (0.25 to 1.82)               | 0.66 (0.24 to 1.79)                      | 0/24,581 (0.0)              | NA                                | NA                                       |
| Mood disorders, excluding those with psychotic symptoms |                       |                                   |                                          |                            |                                   |                                          |                             |                                   |                                          |
| No opioid exposure                                      | 2,867/1,268,815 (0.2) | 1 (reference)                     | 1 (reference)                            | 2,867/1,268,815 (0.2)      | 1 (reference)                     | 1 (reference)                            | 2,867/1,268,815 (0.2)       | 1 (reference)                     | 1 (reference)                            |
| Opioid exposure                                         | 243/93,704 (0.3)      | <b>1.32 (1.16 to 1.51)</b>        | <b>1.27 (1.12 to 1.45)</b>               | 185/69,123 (0.3)           | <b>1.23 (1.06 to 1.42)</b>        | <b>1.19 (1.03 to 1.39)</b>               | 58/24,581 (0.2)             | <b>1.74 (1.34 to 2.26)</b>        | <b>1.62 (1.25 to 2.11)</b>               |
| Anxiety and stress-related disorders                    |                       |                                   |                                          |                            |                                   |                                          |                             |                                   |                                          |
| No opioid exposure                                      | 5,437/1,268,815 (0.4) | 1 (reference)                     | 1 (reference)                            | 5,437/1,268,815 (0.4)      | 1 (reference)                     | 1 (reference)                            | 5,437/1,268,815 (0.4)       | 1 (reference)                     | 1 (reference)                            |
| Opioid exposure                                         | 428/93,704 (0.5)      | <b>1.20 (1.08 to 1.32)</b>        | <b>1.16 (1.05 to 1.28)</b>               | 348/69,123 (0.5)           | <b>1.19 (1.07 to 1.33)</b>        | <b>1.17 (1.05 to 1.30)</b>               | 80/24,581 (0.3)             | 1.21 (0.97 to 1.51)               | 1.14 (0.91 to 1.42)                      |
| Eating disorders                                        |                       |                                   |                                          |                            |                                   |                                          |                             |                                   |                                          |
| No opioid exposure                                      | 178/1,268,815 (0.0)   | 1 (reference)                     | 1 (reference)                            | 178/1,268,815 (0.0)        | 1 (reference)                     | 1 (reference)                            | 178/1,268,815 (0.0)         | 1 (reference)                     | 1 (reference)                            |
| Opioid exposure                                         | 6/93,704 (0.0)        | 0.51 (0.23 to 1.15)               | 0.50 (0.22 to 1.12)                      | 4/69,123 (0.0)             | 0.42 (0.16 to 1.13)               | 0.41 (0.15 to 1.11)                      | 2/24,581 (0.0)              | 0.90 (0.22 to 3.63)               | 0.85 (0.21 to 3.43)                      |

|                                  |                        |                            |                            |                        |                            |                            |                        |                            |                            |
|----------------------------------|------------------------|----------------------------|----------------------------|------------------------|----------------------------|----------------------------|------------------------|----------------------------|----------------------------|
| Compulsive disorders             |                        |                            |                            |                        |                            |                            |                        |                            |                            |
| No opioid exposure               | 441/1,268,815 (0.0)    | 1 (reference)              | 1 (reference)              | 441/1,268,815 (0.0)    | 1 (reference)              | 1 (reference)              | 441/1,268,815 (0.0)    | 1 (reference)              | 1 (reference)              |
| Opioid exposure                  | 29/93,704 (0.0)        | 1.04 (0.71 to 1.52)        | 1.00 (0.68 to 1.45)        | 24/69,123 (0.0)        | 1.05 (0.69 to 1.58)        | 1.01 (0.67 to 1.53)        | 5/24,581 (0.0)         | 1.01 (0.42 to 2.44)        | 0.93 (0.39 to 2.26)        |
| ADHD                             |                        |                            |                            |                        |                            |                            |                        |                            |                            |
| No opioid exposure               | 14,629/1,268,815 (1.2) | 1 (reference)              | 1 (reference)              | 14,629/1,268,815 (1.2) | 1 (reference)              | 1 (reference)              | 14,629/1,268,815 (1.2) | 1 (reference)              | 1 (reference)              |
| Opioid exposure                  | 1,115/93,704 (1.2)     | <b>1.16 (1.10 to 1.24)</b> | <b>1.13 (1.07 to 1.21)</b> | 904/69,123 (1.3)       | <b>1.15 (1.07 to 1.23)</b> | <b>1.13 (1.05 to 1.20)</b> | 211/24,581 (0.9)       | <b>1.24 (1.08 to 1.42)</b> | <b>1.17 (1.02 to 1.34)</b> |
| ASD                              |                        |                            |                            |                        |                            |                            |                        |                            |                            |
| No opioid exposure               | 6,328/1,268,815 (0.5)  | 1 (reference)              | 1 (reference)              | 6,328/1,268,815 (0.5)  | 1 (reference)              | 1 (reference)              | 6,328/1,268,815 (0.5)  | 1 (reference)              | 1 (reference)              |
| Opioid exposure                  | 414/93,704 (0.4)       | 0.96 (0.87 to 1.06)        | 0.95 (0.86 to 1.04)        | 324/69,123 (0.5)       | 0.94 (0.84 to 1.05)        | 0.93 (0.83 to 1.04)        | 90/24,581 (0.4)        | 1.04 (0.85 to 1.29)        | 1.01 (0.82 to 1.25)        |
| Intellectual disability          |                        |                            |                            |                        |                            |                            |                        |                            |                            |
| No opioid exposure               | 3,778/1,268,815 (0.3)  | 1 (reference)              | 1 (reference)              | 3,778/1,268,815 (0.3)  | 1 (reference)              | 1 (reference)              | 3,778/1,268,815 (0.3)  | 1 (reference)              | 1 (reference)              |
| Opioid exposure                  | 334/93,704 (0.4)       | <b>1.31 (1.17 to 1.47)</b> | <b>1.29 (1.15 to 1.44)</b> | 251/69,123 (0.4)       | <b>1.20 (1.06 to 1.37)</b> | <b>1.19 (1.05 to 1.35)</b> | 83/24,581 (0.3)        | <b>1.80 (1.45 to 2.24)</b> | <b>1.74 (1.40 to 2.16)</b> |
| Common neuropsychiatric disorder |                        |                            |                            |                        |                            |                            |                        |                            |                            |
| No opioid exposure               | 41,204/1,267,328 (3.3) | 1 (reference)              | 1 (reference)              | 41,204/1,267,328 (3.3) | 1 (reference)              | 1 (reference)              | 41,204/1,267,328 (3.3) | 1 (reference)              | 1 (reference)              |
| Opioid exposure                  | 2,976/93,584 (3.2)     | <b>1.07 (1.03 to 1.11)</b> | <b>1.05 (1.01 to 1.09)</b> | 2,354/69,031 (3.4)     | <b>1.05 (1.01 to 1.10)</b> | 1.03 (0.99 to 1.08)        | 622/24,553 (2.5)       | <b>1.16 (1.07 to 1.25)</b> | <b>1.10 (1.02 to 1.20)</b> |
| Severe neuropsychiatric disorder |                        |                            |                            |                        |                            |                            |                        |                            |                            |
| No opioid exposure               | 1,487/1,227,611 (0.1)  | 1 (reference)              | 1 (reference)              | 1,487/1,227,611 (0.1)  | 1 (reference)              | 1 (reference)              | 1,487/1,227,611 (0.1)  | 1 (reference)              | 1 (reference)              |

|                 |                  |                            |                     |                 |             |                     |                 |                            |                            |
|-----------------|------------------|----------------------------|---------------------|-----------------|-------------|---------------------|-----------------|----------------------------|----------------------------|
| Opioid exposure | 120/90,728 (0.1) | <b>1.21 (1.01 to 1.46)</b> | 1.18 (0.98 to 1.42) | 92/66,769 (0.1) | 1.13 (0.92) | 1.11 (0.90 to 1.37) | 28/23,959 (0.1) | <b>1.58 (1.09 to 2.30)</b> | <b>1.49 (1.02 to 2.16)</b> |
|-----------------|------------------|----------------------------|---------------------|-----------------|-------------|---------------------|-----------------|----------------------------|----------------------------|

ADHD, attention-deficit hyperactivity disorder; ASD, autism spectrum disorder; CI, confidence interval; HR, hazard ratio; MME, morphine milligram equivalents; SMM, severe maternal morbidity

† The adjusted model was adjusted for the following variables: maternal age at delivery years ( $\leq 19$ , 20-24, 25-29, 30-34, and  $\geq 35$  years), infant sex, region of residence (urban and rural), household income level (1st, 2nd, 3rd, and 4th quartiles), birth season (spring, summer, autumn, and winter), parity (1 and  $\geq 2$ ), maternal mental illness, SMM score (0, 1, and  $\geq 2$ ), and hospital outpatient visit (0, 1, and  $\geq 2$ ), and admission contact (0, 1, and  $\geq 2$ ) in a year before pregnancy.

†† The fully adjusted model was adjusted for the following variables: covariates as in the adjusted model, history of maternal neuropsychiatric conditions (alcohol or drug misuse, mood disorders except those with psychotic symptoms, anxiety and stress-related disorders, sleep disorders, epilepsy, and other neuropsychiatry disorders), and use of NSAID and acetaminophen during pregnancy.

Numbers in bold indicate significant differences ( $P < 0.05$ )



**Table S26.** Hazard ratio model of the association between prenatal opioid exposure during pregnancy and specific neuropsychiatric disorders in children within the child screening cohort from 2010 to 2017

|                                                         | <b>n (%)</b>     | <b>Neuropsychiatric disorder events (%)</b> | <b>Crude hazard ratio (95% CI)</b> |
|---------------------------------------------------------|------------------|---------------------------------------------|------------------------------------|
| Alcohol or drug misuse                                  |                  |                                             |                                    |
| No opioid exposure                                      | 1,268,815 (93.1) | 111 (0.0)                                   | 1 (reference)                      |
| Opioid exposure                                         | 93,704 (6.9)     | 4 (0.0)                                     | 0.49 (0.18 to 1.34)                |
| Mood disorders, excluding those with psychotic symptoms |                  |                                             |                                    |
| No opioid exposure                                      | 1,268,815 (93.1) | 2,867 (0.2)                                 | 1 (reference)                      |
| Opioid exposure                                         | 93,704 (6.9)     | 243 (0.3)                                   | <b>1.28 (1.12 to 1.46)</b>         |
| Anxiety and stress-related disorders                    |                  |                                             |                                    |
| No opioid exposure                                      | 1,268,815 (93.1) | 5,437 (0.4)                                 | 1 (reference)                      |
| Opioid exposure                                         | 93,704 (6.9)     | 428 (0.5)                                   | <b>1.17 (1.06 to 1.29)</b>         |
| Eating disorders                                        |                  |                                             |                                    |
| No opioid exposure                                      | 1,268,815 (93.1) | 178 (0.0)                                   | 1 (reference)                      |
| Opioid exposure                                         | 93,704 (6.9)     | 06 (0.0)                                    | 0.47 (0.21 to 1.06)                |
| Compulsive disorders                                    |                  |                                             |                                    |
| No opioid exposure                                      | 1,268,815 (93.1) | 441 (0.0)                                   | 1 (reference)                      |
| Opioid exposure                                         | 93,704 (6.9)     | 29 (0.0)                                    | 1.01 (0.70 to 1.47)                |
| ADHD                                                    |                  |                                             |                                    |
| No opioid exposure                                      | 1,268,815 (93.1) | 14,629 (1.2)                                | 1 (reference)                      |
| Opioid exposure                                         | 93,704 (6.9)     | 1,115 (1.2)                                 | <b>1.14 (1.07 to 1.21)</b>         |
| ASD                                                     |                  |                                             |                                    |
| No opioid exposure                                      | 1,268,815 (93.1) | 6,328 (0.5)                                 | 1 (reference)                      |

|                                  |                  |              |                            |
|----------------------------------|------------------|--------------|----------------------------|
| Opioid exposure                  | 93,704 (6.9)     | 414 (0.4)    | 0.92 (0.83 to 1.01)        |
| Intellectual disability          |                  |              |                            |
| No opioid exposure               | 1,268,815 (93.1) | 3,778 (0.3)  | 1 (reference)              |
| Opioid exposure                  | 93,704 (6.9)     | 334 (0.4)    | <b>1.26 (1.13 to 1.41)</b> |
| Common neuropsychiatric disorder |                  |              |                            |
| No opioid exposure               | 1,268,815 (93.1) | 41,204 (3.3) | 1 (reference)              |
| Opioid exposure                  | 93,704 (6.9)     | 2,976 (3.2)  | <b>1.05 (1.01 to 1.09)</b> |
| Severe neuropsychiatric disorder |                  |              |                            |
| No opioid exposure               | 1,268,815 (93.1) | 1,487 (0.1)  | 1 (reference)              |
| Opioid exposure                  | 93,704 (6.9)     | 120 (0.1)    | 1.18 (0.98 to 1.42)        |

ADHD, attention-deficit hyperactivity disorder; ASD, autism spectrum disorder; CI, confidence interval

\* Neuropsychiatric incidence rate is expressed per 1,000 person-years

Numbers in bold indicate significant differences ( $P < 0.05$ )

**Table S27.** Results of a systematic rapid review reporting trend of prenatal opioid exposure in the study periods (published, 2020-2023)

| Author, year           | Country                     | Samples | Subject                                           | Data source                      | Results                                                                                                                                                                            | References                                                                                                                                                                                                                                                                                                                                     |
|------------------------|-----------------------------|---------|---------------------------------------------------|----------------------------------|------------------------------------------------------------------------------------------------------------------------------------------------------------------------------------|------------------------------------------------------------------------------------------------------------------------------------------------------------------------------------------------------------------------------------------------------------------------------------------------------------------------------------------------|
| Odsbu et al., 2023     | Denmark, Norway, and Sweden | 14,764  | Infants and paired mothers                        | Nationwide claims cohort         | There are no association between prenatal exposure to opioids and risk of childhood asthma (Norway/Sweden: aHR, 1.07 [95% CI, 0.60-1.92]; Denmark: aHR, 1.25 [95% CI, 0.87-1.81]). | Odsbu I, Handal M, Hjellvik V, Hernandez-Diaz S, Kieler H, Nørgaard M, Skurtveit S, Esen BÖ, Mahic M. Prenatal opioid exposure and risk of asthma in childhood: a population-based study from Denmark, Norway, and Sweden. <i>Front Pharmacol.</i> 2023 May 4;14:1056192. doi: 10.3389/fphar.2023.1056192. PMID: 37214456; PMCID: PMC10192698. |
| Grossarth et al., 2023 | United States               | 390,075 | Infants and paired mothers (mean age, 24.5 years) | Tennessee Medicaid claims cohort | Maternal excessive opioid use had an increased postneonatal infant mortality (aHR, 1.54 [95% CI, 1.07-2.21]).                                                                      | Grossarth S, Osmundson SS, Wiese AD, Phillips SE, Pham A, Leech AA, Patrick SW, Spieker AJ, Grijalva CG, Adgent MA. Maternal Opioid Use Disorder and the Risk of Postneonatal Infant Mortality. <i>JAMA Pediatr.</i> 2023 Jul 1;177(7):675-683. doi: 10.1001/jamapediatrics.2023.1047. PMID: 37155175; PMCID: PMC10167598.                     |

|                       |                 |         |                                |                           |                                                                                                                      |                                                                                                                                                                                                                                                                                                                            |
|-----------------------|-----------------|---------|--------------------------------|---------------------------|----------------------------------------------------------------------------------------------------------------------|----------------------------------------------------------------------------------------------------------------------------------------------------------------------------------------------------------------------------------------------------------------------------------------------------------------------------|
| Bierce et al., 2023   | United States   | 85      | Infants and paired mothers     | Electronic medical record | Prenatal opioid exposure was not significantly related to any developmental outcomes.                                | Bierce L, Tabachnick AR, Eiden RD, Dozier M, Labella MH. A 12-month follow-up of infant neurodevelopmental outcomes of prenatal opioid exposure and polysubstance use. <i>Neurotoxicol Teratol.</i> 2023 May-Jun;97:107176. doi: 10.1016/j.ntt.2023.107176. Epub 2023 Apr 11. PMID: 37054901; PMCID: PMC10198960.          |
| Zipursky et al., 2023 | Ontario, Canada | 865,691 | Infants and paired mothers     | Population based cohort   | There are no association between maternal opioid use and adverse outcomes in infant (aHR, 0.98 [95% CI, 0.93-1.03]). | Zipursky JS, Gomes T, Everett K, Calzavara A, Paterson JM, Austin PC, Mamdani MM, Ray JG, Juurlink DN. Maternal opioid treatment after delivery and risk of adverse infant outcomes: population based cohort study. <i>BMJ.</i> 2023 Mar 15;380:e074005. doi: 10.1136/bmj-2022-074005. PMID: 36921977; PMCID: PMC10015218. |
| Yen et al., 2023      | United States   | 54      | Opioid-exposed and non-exposed | Electronic medical record | Prenatal opioid exposure induced white matter injury and altered reward signaling through a                          | Yen E, Madan N, Tarui T, Kaneko-Tarui T, Breeze JL, Davis JM, Maron JL. Sex-specific inflammatory and white matter effects of                                                                                                                                                                                              |

|                           |               |    |                                                                  |                           |                                                                                                                 |                                                                                                                                                                                                                                                                              |
|---------------------------|---------------|----|------------------------------------------------------------------|---------------------------|-----------------------------------------------------------------------------------------------------------------|------------------------------------------------------------------------------------------------------------------------------------------------------------------------------------------------------------------------------------------------------------------------------|
|                           |               |    | infants                                                          |                           | proinflammatory process.                                                                                        | prenatal opioid exposure: a pilot study. <i>Pediatr Res.</i> 2023 Feb;93(3):604-611. doi: 10.1038/s41390-022-02357-5. Epub 2022 Oct 24. PMID: 36280708; PMCID: PMC9998341.                                                                                                   |
| Vishnubhotla et al., 2022 | United States | 29 | Opioid-exposed and non-exposed infants                           | Electronic medical record | Prenatal opioid exposure induced significant differences in fiber count in two structural connections in brain. | Vishnubhotla RV, Zhao Y, Wen Q, Dietrich J, Sokol GM, Sadhasivam S, Radhakrishnan R. Brain structural connectome in neonates with prenatal opioid exposure. <i>Front Neurosci.</i> 2022 Sep 16;16:952322. doi: 10.3389/fnins.2022.952322. PMID: 36188457; PMCID: PMC9523134. |
| Borrelli et al., 2022     | United States | 39 | 19 opioid-exposed and 20 unexposed control full-term pregnancies | Electronic medical record | Prenatal opioid use resulted in placental dysfunction, leading to abnormal fetal brain development              | Borrelli KN, Wachman EM, Beierle JA, Taglauer ES, Jain M, Bryant CD, Zhang H. Effect of Prenatal Opioid Exposure on the Human Placental Methylome. <i>Biomedicines.</i> 2022 May 17;10(5):1150. doi: 10.3390/biomedicines10051150. PMID: 35625888; PMCID: PMC9138340.        |
| Radhakrishnan et          | United        | 39 | Opioid-                                                          | Electronic                | Prenatal opioid exposure was                                                                                    | Radhakrishnan R, Vishnubhotla RV, Guckien                                                                                                                                                                                                                                    |

|                      |               |           |                                 |                                                 |                                                                                                                                             |                                                                                                                                                                                                                                                                                                                                      |
|----------------------|---------------|-----------|---------------------------------|-------------------------------------------------|---------------------------------------------------------------------------------------------------------------------------------------------|--------------------------------------------------------------------------------------------------------------------------------------------------------------------------------------------------------------------------------------------------------------------------------------------------------------------------------------|
| al., 2022            | States        |           | exposed and non-exposed infants | medical record                                  | associated with thalamocortical functional connectivity in infants.                                                                         | Z, Zhao Y, Sokol GM, Haas DM, Sadhasivam S. Thalamocortical functional connectivity in infants with prenatal opioid exposure correlates with severity of neonatal opioid withdrawal syndrome. <i>Neuroradiology</i> . 2022 Aug;64(8):1649-1659. doi: 10.1007/s00234-022-02939-4. Epub 2022 Apr 12. PMID: 35410397.                   |
| Wen et al., 2021     | United States | 24,910    | Infants and paired mothers      | Medicare advantage health insurance claims data | There are no association between maternal opioid use and risk of neurodevelopmental disorders in the child (aHR, 1.10 [95% CI, 0.92-1.32]). | Wen X, Lawal OD, Belviso N, Matson KL, Wang S, Quilliam BJ, Meador KJ. Association Between Prenatal Opioid Exposure and Neurodevelopmental Outcomes in Early Childhood: A Retrospective Cohort Study. <i>Drug Saf</i> . 2021 Aug;44(8):863-875. doi: 10.1007/s40264-021-01080-0. Epub 2021 Jun 7. PMID: 34100263; PMCID: PMC8830246. |
| Bateman et al., 2021 | United States | 1,602,580 | Infants and paired mothers      | Population based cohort                         | There are no association prescription opioid used in early pregnancy and risk of congenital                                                 | Bateman BT, Hernandez-Diaz S, Straub L, Zhu Y, Gray KJ, Desai RJ, Mogun H, Gautam N, Huybrechts KF. Association of first trimester                                                                                                                                                                                                   |

|  |  |  |  |  |                                 |                                                                                                                                                                                             |
|--|--|--|--|--|---------------------------------|---------------------------------------------------------------------------------------------------------------------------------------------------------------------------------------------|
|  |  |  |  |  | malformations in the offspring. | prescription opioid use with congenital malformations in the offspring: population based cohort study. BMJ. 2021 Feb 10;372:n102. doi: 10.1136/bmj.n102. PMID: 33568363; PMCID: PMC7873721. |
|--|--|--|--|--|---------------------------------|---------------------------------------------------------------------------------------------------------------------------------------------------------------------------------------------|

aHR, adjusted hazard ratio; CI, confidence intervals

## Supplementary Material

The supplementary data 1-11 presented in this supplementary section are results from before the round 3 revision. Following the reviewer's comments, we revised the matching covariates as shown in the table below, and the methodology and results of the original version are attached.

| PS-matching covariates (original version)                                                                                                                                                                                                                                               | PS-matching covariates (revised version)                                                                                                                                                                                                                                                                                                                                                                                        |
|-----------------------------------------------------------------------------------------------------------------------------------------------------------------------------------------------------------------------------------------------------------------------------------------|---------------------------------------------------------------------------------------------------------------------------------------------------------------------------------------------------------------------------------------------------------------------------------------------------------------------------------------------------------------------------------------------------------------------------------|
| maternal age at delivery, infant sex, region of residence, household income level, birth season, year of delivery, parity, delivery type, preterm birth, low birth weight, maternal mental illness, SMM score, and hospital admission and outpatient visit in the year before pregnancy | maternal age at delivery, region of residence, household income level, parity, maternal mental illness, SMM score, hospital admission and outpatient visit in the year before pregnancy and history of maternal neuropsychiatric conditions (alcohol or drug misuse, mood disorders except those with psychotic symptoms, anxiety and stress-related disorders, sleep disorders, epilepsy, and other neuropsychiatry disorders) |

## Supplementary Methods for Supplementary Data

### *Propensity score-matched cohort*

To mitigate potential confounding and to achieve a demographic covariate balance between the opioid-exposed and unexposed groups, we created a PS-matched cohort informed by opioid exposure. PS was derived using an univariate logistic regression model, incorporating variables such as maternal age at delivery, infant sex, region of residence, household income level, birth season, year of delivery, parity, delivery type, preterm birth, low birth weight, maternal mental illness, SMM score, and hospital admission and outpatient visit in the year before pregnancy. Individuals were matched in 1:5 ratio matching between the opioid-exposed (matched n=254,131) and unexposed groups (matched n=1,174,429) within the entire cohort. Using the “greedy nearest-neighbor” algorithm, we randomly matched the two



groups based on PS values within the specified caliper (0.001), ensuring minimal differences. The appropriateness of PS-matched was evaluated using standardized mean differences (SMDs). We considered no substantial imbalance between the two groups when the SMD was less than 0.1 (Figure S6 and S7).

**Supplement data 1. Baseline characteristics of study subjects from 2010-2017**

|                                          | Full unmatched cohort (n=3,128,571) <sup>a</sup> |                                    | PS-matched cohort A (n=1,289,440) <sup>b</sup> |                                    | SMD*  |
|------------------------------------------|--------------------------------------------------|------------------------------------|------------------------------------------------|------------------------------------|-------|
|                                          | Children with prenatal opioid exposure           | Children without prenatal exposure | Children with prenatal opioid exposure         | Children without prenatal exposure |       |
| <b>Total, n</b>                          | 216,012                                          | 2,912,559                          | 215,930                                        | 1,073,510                          |       |
| <b>Maternal characteristics</b>          |                                                  |                                    |                                                |                                    |       |
| Maternal age at delivery year, mean (SD) | 32.3 (4.2)                                       | 31.9 (4.2)                         | 32.3 (4.2)                                     | 32.3 (4.1)                         | <0.01 |
| Maternal age at delivery year, n (%)     |                                                  |                                    |                                                |                                    | <0.01 |
| ≤ 19                                     | 545 (0.3)                                        | 7,330 (0.3)                        | 544 (0.3)                                      | 2,337 (0.2)                        |       |
| 20-24                                    | 7,992 (3.7)                                      | 128,697 (4.4)                      | 7,990 (3.7)                                    | 38,521 (3.6)                       |       |
| 25-29                                    | 41,094 (19.0)                                    | 633,948 (21.8)                     | 41,083 (19.0)                                  | 203,502 (19.0)                     |       |
| 30-34                                    | 102,874 (47.6)                                   | 1,393,988 (47.9)                   | 102,849 (47.6)                                 | 512,798 (47.8)                     |       |
| ≥ 35                                     | 63,507 (29.4)                                    | 748,596 (25.7)                     | 63,464 (29.4)                                  | 316,352 (29.5)                     |       |
| Region of residence, n (%)               |                                                  |                                    |                                                |                                    | <0.01 |
| Rural                                    | 90,163 (41.7)                                    | 1,262,028 (43.3)                   | 90,135 (41.7)                                  | 448,142 (41.8)                     |       |
| Urban                                    | 125,849 (58.3)                                   | 1,650,531 (56.7)                   | 125,795 (58.3)                                 | 625,368 (58.3)                     |       |
| Income level, n (%)                      |                                                  |                                    |                                                |                                    | <0.01 |
| 1st quartile                             | 50,684 (23.5)                                    | 649,207 (22.3)                     | 50,639 (23.5)                                  | 250,953 (23.4)                     |       |
| 2nd quartile                             | 55,788 (25.8)                                    | 750,159 (25.8)                     | 55,769 (25.8)                                  | 276,620 (25.8)                     |       |
| 3rd quartile                             | 54,441 (25.2)                                    | 733,069 (25.2)                     | 54,426 (25.2)                                  | 270,519 (25.2)                     |       |
| 4th quartile                             | 55,099 (25.5)                                    | 780,124 (26.8)                     | 55,096 (25.5)                                  | 275,418 (25.7)                     |       |
| Parity, n (%)                            |                                                  |                                    |                                                |                                    | <0.01 |
| 1                                        | 181,261 (83.9)                                   | 2,217,878 (76.2)                   | 181,179 (83.9)                                 | 903,334 (84.2)                     |       |
| ≥ 2                                      | 34,751 (16.1)                                    | 694,681 (23.9)                     | 34,751 (16.1)                                  | 170,176 (15.9)                     |       |

|                                                                 |                |                  |                |                  |       |
|-----------------------------------------------------------------|----------------|------------------|----------------|------------------|-------|
| Maternal medical conditions, n (%)                              |                |                  |                |                  | 0.02  |
| No mental illness                                               | 168,482 (78.0) | 2,473,110 (84.9) | 168,480 (78.0) | 844,247 (78.6)   |       |
| Common                                                          | 42,533 (19.7)  | 398,371 (13.7)   | 42,492 (19.7)  | 206,982 (19.3)   |       |
| Severe                                                          | 4,997 (2.3)    | 41,078 (1.4)     | 4,958 (2.3)    | 22,281 (2.1)     |       |
| Severe maternal morbidity, n (%)                                |                |                  |                |                  | <0.01 |
| 0                                                               | 198,017 (91.7) | 2,731,862 (93.8) | 197,996 (91.7) | 988,414 (92.1)   |       |
| 1                                                               | 17,332 (8.0)   | 175,983 (6.0)    | 17,294 (8.0)   | 82,760 (7.7)     |       |
| ≥ 2                                                             | 663 (0.3)      | 4,714 (0.2)      | 640 (0.3)      | 2,336 (0.2)      |       |
| Delivery type, n (%)                                            |                |                  |                |                  | <0.01 |
| Vaginal delivery                                                | 115,193 (53.3) | 1,693,716 (58.2) | 115,192 (53.4) | 576,083 (53.7)   |       |
| Cesarean section                                                | 100,819 (46.7) | 1,218,843 (41.9) | 100,738 (46.7) | 497,427 (46.3)   |       |
| Number of hospital admissions in a year before pregnancy, n (%) |                |                  |                |                  | <0.01 |
| 0                                                               | 171,976 (79.6) | 2,468,433 (84.8) | 171,967 (79.6) | 858,185 (79.9)   |       |
| 1                                                               | 35,213 (16.3)  | 370,988 (12.7)   | 35,196 (16.3)  | 174,556 (16.3)   |       |
| ≥ 2                                                             | 8,823 (4.1)    | 73,138 (2.5)     | 8,767 (4.1)    | 40,769 (3.8)     |       |
| Number of outpatient contacts in a year before pregnancy, n (%) |                |                  |                |                  | <0.01 |
| 0                                                               | 4,619 (2.1)    | 188,625 (6.5)    | 4,619 (2.1)    | 23,055 (2.2)     |       |
| 1                                                               | 4,890 (2.3)    | 162,503 (5.6)    | 4,890 (2.3)    | 24,291 (2.3)     |       |
| ≥ 2                                                             | 206,503 (95.6) | 2,561,431 (87.9) | 206,421 (95.6) | 1,026,164 (95.6) |       |
| <b>Infant characteristics</b>                                   |                |                  |                |                  |       |
| Infant sex, n (%)                                               |                |                  |                |                  | <0.01 |
| Male                                                            | 110,511 (51.2) | 1,495,374 (51.3) | 110,468 (51.2) | 549,630 (51.2)   |       |

|                                                            |                |                  |                |                |       |
|------------------------------------------------------------|----------------|------------------|----------------|----------------|-------|
| Female                                                     | 105,501 (48.8) | 1,417,185 (48.7) | 105,462 (48.8) | 523,880 (48.8) |       |
| Birth season, n (%)                                        |                |                  |                |                | <0.01 |
| Spring                                                     | 53,228 (24.6)  | 756,304 (26.0)   | 53,222 (24.7)  | 265,508 (24.7) |       |
| Summer                                                     | 58,458 (27.1)  | 708,808 (24.3)   | 58,414 (27.1)  | 289,063 (26.9) |       |
| Autumn                                                     | 51,697 (23.9)  | 718,496 (24.7)   | 51,685 (23.9)  | 257,521 (24.0) |       |
| Winter                                                     | 52,629 (24.4)  | 728,951 (25.0)   | 52,609 (24.4)  | 261,418 (24.4) |       |
| Year of delivery, n (%)                                    |                |                  |                |                | <0.01 |
| 2010 to 2012                                               | 69,885 (32.4)  | 1,119,845 (38.5) | 69,884 (32.4)  | 347,978 (32.4) |       |
| 2013 to 2015                                               | 76,973 (35.6)  | 997,353 (34.2)   | 76,949 (35.6)  | 382,853 (35.7) |       |
| 2016 to 2017                                               | 69,154 (32.0)  | 795,361 (27.3)   | 69,097 (32.0)  | 342,679 (31.9) |       |
| At-risk newborn, n (%)                                     |                |                  |                |                | 0.02  |
| Preterm birth                                              | 10,817 (5.0)   | 103,949 (3.6)    | 10,760 (5.0)   | 47,474 (4.4)   |       |
| Low birth weight                                           | 7,860 (3.6)    | 83,354 (2.9)     | 7,823 (3.6)    | 34,172 (3.2)   |       |
| <b>Unmatching variables (maternal parameters)</b>          |                |                  |                |                |       |
| Alcohol or drug misuse, n (%)                              | 558 (0.3)      | 3,920 (0.1)      | 550 (0.3)      | 2,211 (0.2)    |       |
| Mood disorders except those with psychotic symptoms, n (%) | 9,699 (4.5)    | 74,053 (2.5)     | 9,651 (4.5)    | 41,468 (3.9)   |       |
| Anxiety and stress-related disorders, n (%)                | 16,195 (7.5)   | 129,873 (4.5)    | 16,150 (7.5)   | 72,171 (6.7)   |       |
| Sleep disorders, n (%)                                     | 8,392 (3.9)    | 59,394 (2.0)     | 8,359 (3.9)    | 30,223 (2.8)   |       |
| Epilepsy, n (%)                                            | 884 (0.4)      | 8,696 (0.3)      | 873 (0.4)      | 4,071 (0.4)    |       |
| Other neuropsychiatry disorders, n (%)                     | 814 (0.4)      | 6,713 (0.2)      | 810 (0.4)      | 3,630 (0.3)    |       |
| Use of NSAID during pregnancy, n (%)                       | 103,912 (48.1) | 482,329 (16.6)   | 103,848 (48.1) | 197,804 (18.4) |       |

|                                                 |                |                |                |                |  |
|-------------------------------------------------|----------------|----------------|----------------|----------------|--|
| Use of acetaminophen during pregnancy,<br>n (%) | 148,024 (68.5) | 789,528 (27.1) | 147,964 (68.5) | 305,624 (28.5) |  |
|-------------------------------------------------|----------------|----------------|----------------|----------------|--|

NSAID, nonsteroidal anti-inflammatory drug; PS, propensity score; SD, standard deviation; SMD, standardized mean difference

\* SMD <0.1 corresponds to no major imbalance

<sup>a</sup> Full unmatched cohort involves infants born between 2010 and 2017 (Cohort 1 in Figure 1 and Table S8).

<sup>b</sup> PS-matched cohort A, derived from the full unmatched cohort, involves a 1:5 matching ratio and pairs the exposed and unexposed groups in a 1:5 ratio using PS (Cohort 2 in Figure 1 and Table S8).

**Supplement data 2.** Hazard ratio models of the association between prenatal opioid exposure during pregnancy and neuropsychiatric disorders in children with the 1:5 PS-matched cohort A from 2010 to 2017

|                                  | n (%)            | Neuropsychiatric disorder events (%) | Person-years | Neuropsychiatric incidence rate* | Hazard ratio (95% CI)      |                            |                            |
|----------------------------------|------------------|--------------------------------------|--------------|----------------------------------|----------------------------|----------------------------|----------------------------|
|                                  |                  |                                      |              |                                  | Crude                      | Adjusted†                  | Fully adjusted††           |
| Opioid exposure during pregnancy |                  |                                      |              |                                  |                            |                            |                            |
| No                               | 1,073,510 (83.3) | 34,499 (3.2)                         | 6,376,813    | 5.4                              | 1 (reference)              | 1 (reference)              | 1 (reference)              |
| Yes                              | 215,930 (16.8)   | 7,396 (3.4)                          | 1,271,904    | 5.8                              | <b>1.08 (1.05 to 1.11)</b> | <b>1.07 (1.05 to 1.10)</b> | <b>1.06 (1.04 to 1.09)</b> |
| Timing of opioid exposure        |                  |                                      |              |                                  |                            |                            |                            |
| No opioid exposure               | 1,073,510 (83.3) | 34,499 (3.2)                         | 6,376,813    | 5.4                              | 1 (reference)              | 1 (reference)              | 1 (reference)              |
| First trimester only             | 87,555 (6.8)     | 3,326 (3.8)                          | 532,942      | 6.2                              | <b>1.16 (1.12 to 1.20)</b> | <b>1.11 (1.08 to 1.55)</b> | <b>1.10 (1.06 to 1.14)</b> |
| Second trimester only            | 50,764 (3.9)     | 1,600 (3.2)                          | 290,994      | 5.5                              | 1.03 (0.98 to 1.08)        | 1.03 (0.98 to 1.08)        | 1.03 (0.97 to 1.04)        |
| Third trimester only             | 61,117 (4.7)     | 1,861 (3.0)                          | 354,579      | 5.3                              | 0.97 (0.92 to 1.01)        | 1.00 (0.95 to 1.05)        | 1.00 (0.95 to 1.05)        |
| More than one trimester          | 16,494 (1.3)     | 609 (3.7)                            | 93,389       | 6.5                              | <b>1.22 (1.13 to 1.32)</b> | <b>1.24 (1.15 to 1.35)</b> | <b>1.19 (1.10 to 1.29)</b> |
| Dose-dependent association, MME  |                  |                                      |              |                                  |                            |                            |                            |
| None                             | 1,073,510 (83.3) | 34,499 (3.2)                         | 6,376,813    | 5.4                              | 1 (reference)              | 1 (reference)              | 1 (reference)              |
| Low-dose user                    | 161,682 (12.5)   | 5,730 (3.5)                          | 1,000,497    | 5.7                              | <b>1.05 (1.02 to 1.08)</b> | <b>1.05 (1.02 to 1.08)</b> | <b>1.04 (1.02 to 1.08)</b> |
| High-dose user                   | 54,248 (4.2)     | 1,666 (3.07)                         | 271,407      | 6.14                             | <b>1.19 (1.13 to 1.25)</b> | <b>1.17 (1.12 to 1.23)</b> | <b>1.14 (1.08 to 1.19)</b> |
| Opioid prescriptions, days       |                  |                                      |              |                                  |                            |                            |                            |
| 0                                | 1,073,510 (83.3) | 34,499 (3.2)                         | 6,376,813    | 5.4                              | 1 (reference)              | 1 (reference)              | 1 (reference)              |
| 1-29                             | 212,818 (16.5)   | 7,265 (3.4)                          | 1,255,258    | 5.8                              | <b>1.07 (1.05 to 1.10)</b> | <b>1.07 (1.03 to 1.10)</b> | <b>1.06 (1.03 to 1.09)</b> |
| 30-59                            | 2,818 (0.2)      | 113 (4.0)                            | 15,174       | 7.5                              | <b>1.41 (1.17 to 1.70)</b> | <b>1.43 (1.19 to 1.72)</b> | <b>1.34 (1.11 to 1.61)</b> |

|                                |                  |              |           |      |                            |                            |                            |
|--------------------------------|------------------|--------------|-----------|------|----------------------------|----------------------------|----------------------------|
| ≥60                            | 294 (0.0)        | 18 (6.1)     | 1,472     | 12.2 | <b>2.41 (1.52 to 3.82)</b> | <b>2.33 (1.47 to 3.69)</b> | <b>1.79 (1.13 to 2.84)</b> |
| Number of opioid prescriptions |                  |              |           |      |                            |                            |                            |
| 0-1                            | 1,073,510 (83.3) | 34,499 (3.2) | 6,376,813 | 5.4  | 1 (reference)              | 1 (reference)              | 1 (reference)              |
| 2                              | 104,975 (8.1)    | 3,506 (3.3)  | 626,564   | 5.6  | 1.03 (1.00 to 1.07)        | 1.02 (0.99 to 1.06)        | 1.02 (0.99 to 1.06)        |
| ≥ 3                            | 110,955 (8.6)    | 3,890 (3.5)  | 645,340   | 6.0  | <b>1.12 (1.08 to 1.16)</b> | <b>1.13 (1.09 to 1.16)</b> | <b>1.11 (1.07 to 1.14)</b> |

CI, confidence interval; MME, morphine milligram equivalent; PS, propensity-score; SMM, severe maternal morbidity

PS-matched cohort A, derived from the full unmatched cohort, involves a 1:5 matching ratio and pairs the exposed and unexposed groups in a 1:5 ratio using PS (Cohort 2 in Figure 1 and Table S8).

\* Neuropsychiatric incidence rate is expressed per 1,000 person-years.

† The adjusted model was adjusted for the following variables: maternal age at delivery years ( $\leq 19$ , 20-24, 25-29, 30-34, and  $\geq 35$  years), infant sex, region of residence (urban and rural), household income level (1st, 2nd, 3rd, and 4th quartiles), birth season (spring, summer, autumn, and winter), parity (1 and  $\geq 2$ ), maternal mental illness, SMM score (0, 1, and  $\geq 2$ ), and hospital outpatient visit (0, 1, and  $\geq 2$ ), and admission contact (0, 1, and  $\geq 2$ ) in a year before pregnancy.

†† The fully adjusted model was adjusted for the following variables: covariates as in the adjusted model, history of maternal neuropsychiatric conditions (alcohol or drug misuse, mood disorders except those with psychotic symptoms, anxiety and stress-related disorders, sleep disorders, epilepsy, and other neuropsychiatry disorders), and use of NSAID and acetaminophen during pregnancy.

Numbers in bold indicate significant differences ( $P < 0.05$ ).

**Supplement data 3.** Stratification analysis for hazard ratio models of the association between opioid exposure during pregnancy and neuropsychiatric disorders in children with the 1:5 PS-matched cohort A from 2010 to 2017

|                             | n (%)            | Neuropsychiatric disorder events (%) | Person-years | Neuropsychiatric incidence rate* | Hazard ratio (95% CI)      |                            |                            |
|-----------------------------|------------------|--------------------------------------|--------------|----------------------------------|----------------------------|----------------------------|----------------------------|
|                             |                  |                                      |              |                                  | Crude                      | Adjusted†                  | Fully adjusted††           |
| Infant sex                  |                  |                                      |              |                                  |                            |                            |                            |
| Male                        | 660,098 (51.2)   | 5,138 (4.7)                          | 647,727      | 7.9                              | <b>1.07 (1.04 to 1.10)</b> | <b>1.06 (1.03 to 2.00)</b> | <b>1.05 (1.02 to 1.09)</b> |
| Female                      | 629,342 (48.8)   | 2,258 (2.1)                          | 624,177      | 3.6                              | <b>1.10 (1.05 to 1.16)</b> | <b>1.10 (1.05 to 1.15)</b> | <b>1.08 (1.03 to 1.13)</b> |
| Birth season                |                  |                                      |              |                                  |                            |                            |                            |
| Spring                      | 318,730 (24.7)   | 1,731 (3.3)                          | 308,335      | 5.6                              | <b>1.09 (1.04 to 1.15)</b> | <b>1.09 (1.04 to 1.15)</b> | <b>1.08 (1.03 to 1.14)</b> |
| Summer                      | 347,477 (27.0)   | 2,061 (3.5)                          | 345,877      | 6.0                              | <b>1.10 (1.05 to 1.15)</b> | <b>1.09 (1.04 to 1.13)</b> | <b>1.08 (1.03 to 1.13)</b> |
| Autumn                      | 309,206 (24.0)   | 1,838 (3.6)                          | 307,223      | 6.0                              | 1.05 (1.00 to 1.10)        | 1.042 (0.99 to 1.10)       | 1.03 (0.98 to 1.09)        |
| Winter                      | 314,027 (24.4)   | 1,766 (3.4)                          | 310,469      | 5.7                              | <b>1.07 (1.02 to 1.13)</b> | <b>1.07 (1.02 to 1.13)</b> | <b>1.06 (1.01 to 1.12)</b> |
| Year of delivery            |                  |                                      |              |                                  |                            |                            |                            |
| 2010-2012                   | 417,862 (32.4)   | 4,317 (6.2)                          | 605,042      | 7.1                              | <b>1.10 (1.07 to 1.14)</b> | <b>1.10 (1.06 to 1.14)</b> | <b>1.09 (1.05 to 1.13)</b> |
| 2013-2015                   | 459,802 (35.7)   | 2,300 (3.0)                          | 455,473      | 5.1                              | 1.04 (1.00 to 1.10)        | 1.04 (0.99 to 1.09)        | 1.03 (0.99 to 1.09)        |
| 2016-2017                   | 411,776 (31.9)   | 779 (1.1)                            | 211,389      | 3.7                              | 1.04 (0.96 to 1.12)        | 1.04 (0.96 to 1.12)        | 1.03 (0.95 to 1.11)        |
| Maternal medical conditions |                  |                                      |              |                                  |                            |                            |                            |
| No mental illness           | 1,012,727 (78.5) | 4,437 (2.6)                          | 989,756      | 4.5                              | <b>1.07 (1.04 to 1.11)</b> | <b>1.07 (1.03 to 1.10)</b> | <b>1.07 (1.03 to 1.10)</b> |
| Mental illness              | 276,713 (21.5)   | 2,959 (6.2)                          | 282,148      | 10.5                             | <b>1.08 (1.03 to 1.12)</b> | <b>1.07 (1.03 to 1.11)</b> | <b>1.07 (1.03 to 1.11)</b> |
| Delivery type               |                  |                                      |              |                                  |                            |                            |                            |
| Vaginal delivery            | 691,275 (53.6)   | 3,723 (3.2)                          | 695,849      | 5.4                              | 1.04 (1.00 to 1.07)        | 1.04 (1.00 to 1.07)        | 1.03 (0.99 to 1.07)        |
| Cesarean section            | 598,165 (46.4)   | 3,673 (3.7)                          | 576,055      | 6.4                              | <b>1.12 (1.08 to 1.16)</b> | <b>1.12 (1.08 to 1.16)</b> | <b>1.10 (1.06 to 1.14)</b> |
| Medical condition of infant |                  |                                      |              |                                  |                            |                            |                            |



|                                                     |                  |             |           |      |                            |                            |                            |
|-----------------------------------------------------|------------------|-------------|-----------|------|----------------------------|----------------------------|----------------------------|
| None                                                | 1,220,768 (94.7) | 6,691 (3.3) | 1,202,399 | 5.6  | <b>1.11 (1.02 to 1.20)</b> | <b>1.07 (1.04 to 1.10)</b> | <b>1.06 (1.03 to 1.09)</b> |
| At-risk newborn                                     | 68,672 (5.3)     | 705 (5.5)   | 69,505    | 10.1 | 1.00 (0.97 to 1.04)        | 1.09 (1.00 to 1.18)        | 1.07 (0.98 to 1.16)        |
| Alcohol or drug misuse                              |                  |             |           |      |                            |                            |                            |
| No                                                  | 1,286,679 (99.8) | 7,337 (3.4) | 1,269,363 | 5.8  | <b>1.08 (1.05 to 1.10)</b> | <b>1.07 (1.04 to 1.10)</b> | <b>1.09 (1.03 to 1.09)</b> |
| Yes                                                 | 2,761 (0.2)      | 59 (10.7)   | 2,541     | 23.2 | <b>2.12 (1.56 to 2.90)</b> | <b>2.12 (1.55 to 2.90)</b> | <b>2.07 (1.51 to 2.83)</b> |
| Mood disorders except those with psychotic symptoms |                  |             |           |      |                            |                            |                            |
| No                                                  | 1,238,321 (96.0) | 6,858 (3.3) | 1,224,673 | 5.6  | <b>1.06 (1.04 to 1.09)</b> | <b>1.06 (1.03 to 1.09)</b> | <b>1.06 (1.03 to 1.08)</b> |
| Yes                                                 | 51,119 (4.0)     | 538 (5.6)   | 47,231    | 11.4 | <b>1.19 (1.08 to 1.30)</b> | <b>1.17 (1.06 to 1.29)</b> | <b>1.16 (1.05 to 1.27)</b> |
| Anxiety and stress-related disorders                |                  |             |           |      |                            |                            |                            |
| No                                                  | 1,201,119 (93.2) | 6,644 (3.3) | 1,190,094 | 5.6  | <b>1.06 (1.03 to 1.09)</b> | <b>1.06 (1.03 to 1.09)</b> | <b>1.06 (1.03 to 1.09)</b> |
| Yes                                                 | 88,321 (6.9)     | 752 (4.7)   | 81,810    | 9.2  | <b>1.18 (1.09 to 1.28)</b> | <b>1.15 (1.07 to 1.25)</b> | <b>1.13 (1.04 to 1.22)</b> |
| Sleep disorders                                     |                  |             |           |      |                            |                            |                            |
| No                                                  | 1,250,858 (97.0) | 6,963 (3.4) | 1,231,349 | 5.7  | <b>1.06 (1.03 to 1.09)</b> | <b>1.06 (1.03 to 1.09)</b> | <b>1.05 (1.03 to 1.08)</b> |
| Yes                                                 | 38,582 (3.0)     | 433 (5.2)   | 40,555    | 10.7 | <b>1.29 (1.15 to 1.43)</b> | <b>1.25 (1.12 to 1.40)</b> | <b>1.25 (1.12 to 1.39)</b> |
| Epilepsy                                            |                  |             |           |      |                            |                            |                            |
| No                                                  | 1,284,496 (99.6) | 7,333 (3.4) | 1,267,523 | 5.8  | <b>1.08 (1.05 to 1.10)</b> | <b>1.07 (1.05 to 1.10)</b> | <b>1.06 (1.04 to 1.09)</b> |
| Yes                                                 | 4,944 (0.4)      | 63 (7.2)    | 4,381     | 14.4 | 1.29 (0.98 to 1.70)        | <b>1.36 (1.03 to 1.80)</b> | <b>1.33 (1.01 to 1.76)</b> |
| Other neuropsychiatry disorders                     |                  |             |           |      |                            |                            |                            |
| No                                                  | 1,285,000 (99.7) | 7,330 (3.4) | 1,268,302 | 5.8  | <b>1.08 (1.05 to 1.10)</b> | <b>1.07 (1.04 to 1.10)</b> | <b>1.06 (1.04 to 1.09)</b> |
| Yes                                                 | 4,440 (0.3)      | 66 (8.2)    | 3,602     | 18.3 | <b>1.37 (1.04 to 1.80)</b> | <b>1.34 (1.02 to 1.76)</b> | 1.32 (1.00 to 1.75)        |
| Use of NSAID during pregnancy                       |                  |             |           |      |                            |                            |                            |
| No                                                  | 987,788 (76.6)   | 3,418 (3.1) | 652,020   | 5.2  | 1.04 (1.00 to 1.08)        | 1.02 (0.98 to 1.06)        | 1.02 (0.98 to 1.05)        |

|                                       |                |             |         |     |                     |                     |                     |
|---------------------------------------|----------------|-------------|---------|-----|---------------------|---------------------|---------------------|
| Yes                                   | 301,652 (23.4) | 3,978 (3.8) | 619,884 | 6.4 | 1.03 (0.97 to 1.08) | 1.03 (0.99 to 1.07) | 1.03 (0.99 to 1.07) |
| Use of acetaminophen during pregnancy |                |             |         |     |                     |                     |                     |
| No                                    | 835,852 (64.8) | 1,441 (2.1) | 295,283 | 4.9 | 1.03 (0.97 to 1.08) | 1.05 (0.99 to 1.11) | 1.05 (0.99 to 1.10) |
| Yes                                   | 453,588 (35.2) | 5,955 (4.0) | 976,621 | 6.1 | 1.03 (1.00 to 1.06) | 1.03 (1.00 to 1.06) | 1.03 (0.99 to 1.06) |

CI, confidence interval; NSAID, nonsteroidal anti-inflammatory drug; MME, morphine milligram equivalent; PS, propensity score; SMM, severe maternal morbidity

PS-matched cohort A, derived from the full unmatched cohort, involves a 1:5 matching ratio and pairs the exposed and unexposed groups in a 1:5 ratio using PS (Cohort 2 in Figure 1 and Table S8).

\* Neuropsychiatric incidence rate is expressed per 1,000 person-years

† The adjusted model was adjusted for the following variables: maternal age at delivery years ( $\leq 19$ , 20-24, 25-29, 30-34, and  $\geq 35$  years), infant sex, region of residence (urban and rural), household income level (1st, 2nd, 3rd, and 4th quartiles), birth season (spring, summer, autumn, and winter), parity (1 and  $\geq 2$ ), maternal mental illness, SMM score (0, 1, and  $\geq 2$ ), and hospital outpatient visit (0, 1, and  $\geq 2$ ), and admission contact (0, 1, and  $\geq 2$ ) in a year before pregnancy.

†† The fully adjusted model was adjusted for the following variables: covariates as in the adjusted model, history of maternal neuropsychiatric conditions (alcohol or drug misuse, mood disorders except those with psychotic symptoms, anxiety and stress-related disorders, sleep disorders, epilepsy, and other neuropsychiatry disorders), and use of NSAID and acetaminophen during pregnancy.

Numbers in bold indicate significant differences ( $P < 0.05$ ).

**Supplement data 4.** Adjusted hazard ratio models of the dose-dependence between prenatal opioid exposure during pregnancy and specific neuropsychiatric disorders in children within the 1:5 PS-matched cohort A from 2010 to 2017

|                                                         | Overall               |                            |                              | Low-dose users (<25.5 MME) |                            |                              | High-dose users (≥25.5 MME) |                            |                              |
|---------------------------------------------------------|-----------------------|----------------------------|------------------------------|----------------------------|----------------------------|------------------------------|-----------------------------|----------------------------|------------------------------|
|                                                         | Events, n (%)         | Adjusted HR (95% CI)†      | Fully adjusted HR (95% CI)†† | Events, n (%)              | Adjusted HR (95% CI)†      | Fully adjusted HR (95% CI)†† | Events, n (%)               | Adjusted HR (95% CI)†      | Fully adjusted HR (95% CI)†† |
| Alcohol or drug misuse                                  |                       |                            |                              |                            |                            |                              |                             |                            |                              |
| No opioid exposure                                      | 84/1,073,510 (0.0)    | 1 (reference)              | 1 (reference)                | 84/1,073,510 (0.0)         | 1 (reference)              | 1 (reference)                | 84/1,073,510 (0.0)          | 1 (reference)              | 1 (reference)                |
| Opioid exposure                                         | 15/215,930 (0.0)      | 0.89 (0.51 to 1.53)        | 0.88 (0.51 to 1.52)          | 14/161,682 (0.0)           | 1.07 (0.61 to 1.88)        | 1.06 (0.60 to 1.88)          | 1/54,248 (0.0)              | 0.27 (0.04 to 1.91)        | 0.26 (0.04 to 1.88)          |
| Mood disorders, excluding those with psychotic symptoms |                       |                            |                              |                            |                            |                              |                             |                            |                              |
| No opioid exposure                                      | 2,281/1,073,510 (0.2) | 1 (reference)              | 1 (reference)                | 2,281/1,073,510 (0.2)      | 1 (reference)              | 1 (reference)                | 2,281/1,073,510 (0.2)       | 1 (reference)              | 1 (reference)                |
| Opioid exposure                                         | 535/215,930 (0.3)     | <b>1.18 (1.08 to 1.30)</b> | <b>1.16 (1.06 to 1.28)</b>   | 418/161,682 (0.3)          | <b>1.15 (1.03 to 1.27)</b> | <b>1.14 (1.03 to 1.26)</b>   | 117/54,248 (0.2)            | <b>1.32 (1.10 to 1.59)</b> | <b>1.26 (1.05 to 1.52)</b>   |
| Anxiety and stress-related disorders                    |                       |                            |                              |                            |                            |                              |                             |                            |                              |
| No opioid exposure                                      | 4,456/1,073,510 (0.4) | 1 (reference)              | 1 (reference)                | 4,456/1,073,510 (0.4)      | 1 (reference)              | 1 (reference)                | 4,456/1,073,510 (0.4)       | 1 (reference)              | 1 (reference)                |

|                         |                        |                            |                            |                        |                            |                            |                        |                            |                            |
|-------------------------|------------------------|----------------------------|----------------------------|------------------------|----------------------------|----------------------------|------------------------|----------------------------|----------------------------|
| Opioid exposure         | 933/215,930 (0.4)      | 1.05 (0.98 to 1.13)        | 1.04 (0.97 to 1.11)        | 734/161,682 (0.5)      | 1.03 (0.96 to 1.12)        | 1.03 (0.95 to 1.11)        | 199/54,248 (0.4)       | 1.13 (0.98 to 1.30)        | 1.08 (0.94 to 1.25)        |
| Eating disorders        |                        |                            |                            |                        |                            |                            |                        |                            |                            |
| No opioid exposure      | 134/1,073,510 (0.0)    | 1 (reference)              | 1 (reference)              | 134/1,073,510 (0.0)    | 1 (reference)              | 1 (reference)              | 134/1,073,510 (0.0)    | 1 (reference)              | 1 (reference)              |
| Opioid exposure         | 21/215,930 (0.0)       | 0.78 (0.49 to 1.24)        | 0.78 (0.49 to 1.23)        | 16/161,682 (0.0)       | 0.74 (0.44 to 1.25)        | 0.74 (0.44 to 1.25)        | 5/54,248 (0.0)         | 0.96 (0.39 to 2.34)        | 0.92 (0.38 to 2.25)        |
| Compulsive disorders    |                        |                            |                            |                        |                            |                            |                        |                            |                            |
| No opioid exposure      | 326/1,073,510 (0.0)    | 1 (reference)              | 1 (reference)              | 326/1,073,510 (0.0)    | 1 (reference)              | 1 (reference)              | 326/1,073,510 (0.0)    | 1 (reference)              | 1 (reference)              |
| Opioid exposure         | 56/215,930 (0.0)       | 0.87 (0.65 to 1.15)        | 0.86 (0.65 to 1.14)        | 42/161,682 (0.0)       | 0.81 (0.59 to 1.11)        | 0.80 (0.58 to 1.11)        | 14/54,248 (0.0)        | 1.13 (0.66 to 1.93)        | 1.10 (0.64 to 1.88)        |
| ADHD                    |                        |                            |                            |                        |                            |                            |                        |                            |                            |
| No opioid exposure      | 11,013/1,073,510 (1.0) | 1 (reference)              | 1 (reference)              | 11,013/1,073,510 (1.0) | 1 (reference)              | 1 (reference)              | 11,013/1,073,510 (1.0) | 1 (reference)              | 1 (reference)              |
| Opioid exposure         | 2,454/215,930 (1.1)    | <b>1.12 (1.07 to 1.17)</b> | <b>1.11 (1.06 to 1.16)</b> | 1,954/161,682 (1.2)    | <b>1.11 (1.05 to 1.16)</b> | <b>1.10 (1.05 to 1.16)</b> | 500/54,248 (0.9)       | <b>1.18 (1.08 to 1.29)</b> | <b>1.13 (1.04 to 1.24)</b> |
| ASD                     |                        |                            |                            |                        |                            |                            |                        |                            |                            |
| No opioid exposure      | 5,472/1,073,510 (0.5)  | 1 (reference)              | 1 (reference)              | 5,472/1,073,510 (0.5)  | 1 (reference)              | 1 (reference)              | 5,472/1,073,510 (0.5)  | 1 (reference)              | 1 (reference)              |
| Opioid exposure         | 1,072/215,930 (0.5)    | 0.98 (0.91 to 1.04)        | 0.97 (0.91 to 1.03)        | 818/161,682 (0.5)      | 0.95 (0.88 to 1.02)        | 0.95 (0.88 to 1.02)        | 254/54,248 (0.5)       | 1.08 (0.95 to 1.22)        | 1.05 (0.93 to 1.20)        |
| Intellectual disability |                        |                            |                            |                        |                            |                            |                        |                            |                            |

|                                  |                        |                            |                            |                        |                            |                            |                        |                            |                            |
|----------------------------------|------------------------|----------------------------|----------------------------|------------------------|----------------------------|----------------------------|------------------------|----------------------------|----------------------------|
| No opioid exposure               | 3,399/1,073,510 (0.3)  | 1 (reference)              | 1 (reference)              | 3,399/1,073,510 (0.3)  | 1 (reference)              | 1 (reference)              | 3,399/1,073,510 (0.3)  | 1 (reference)              | 1 (reference)              |
| Opioid exposure                  | 864/215,930 (0.4)      | <b>1.27 (1.18 to 1.36)</b> | <b>1.26 (1.17 to 1.35)</b> | 650/161,682 (0.4)      | <b>1.19 (1.09 to 1.29)</b> | <b>1.19 (1.10 to 1.29)</b> | 214/54,248 (0.4)       | <b>1.58 (1.37 to 1.81)</b> | <b>1.54 (1.34 to 1.77)</b> |
| Common neuropsychiatric disorder |                        |                            |                            |                        |                            |                            |                        |                            |                            |
| No opioid exposure               | 33,282/1,072,293 (3.1) | 1 (reference)              | 1 (reference)              | 33,282/1,072,293 (3.1) | 1 (reference)              | 1 (reference)              | 33,282/1,072,293 (3.1) | 1 (reference)              | 1 (reference)              |
| Opioid exposure                  | 7,077/215,611 (3.3)    | <b>1.07 (1.04 to 1.09)</b> | <b>1.06 (1.03 to 1.08)</b> | 5,476/161,428 (3.4)    | <b>1.04 (1.01 to 1.07)</b> | <b>1.04 (1.01 to 1.07)</b> | 1,601/54,183 (3.0)     | <b>1.17 (1.11 to 1.23)</b> | <b>1.13 (1.08 to 1.19)</b> |
| Severe neuropsychiatric disorder |                        |                            |                            |                        |                            |                            |                        |                            |                            |
| No opioid exposure               | 1,217/1,040,228 (0.1)  | 1 (reference)              | 1 (reference)              | 1,217/1,040,228 (0.1)  | 1 (reference)              | 1 (reference)              | 1,217/1,040,228 (0.1)  | 1 (reference)              | 1 (reference)              |
| Opioid exposure                  | 319/208,853 (0.2)      | <b>1.31 (1.16 to 1.49)</b> | <b>1.29 (1.14 to 1.46)</b> | 254/156,206 (0.2)      | <b>1.30 (1.14 to 1.49)</b> | <b>1.29 (1.13 to 1.48)</b> | 65/52,647 (0.1)        | <b>1.37 (1.06 to 1.75)</b> | <b>1.30 (1.01 to 1.67)</b> |

ADHD, attention-deficit hyperactivity disorder; ASD, autism spectrum disorder; CI, confidence interval; HR, hazard ratio; MME, morphine milligram equivalents; PS, propensity score; SMM, severe maternal morbidity

PS-matched cohort A, derived from the full unmatched cohort, involves a 1:5 matching ratio and pairs the exposed and unexposed groups in a 1:5 ratio using PS (Cohort 2 in Figure 1 and Table S8).

† The adjusted model was adjusted for the following variables: maternal age at delivery years ( $\leq 19$ , 20-24, 25-29, 30-34, and  $\geq 35$  years), infant sex, region of residence (urban and rural), household income level (1st, 2nd, 3rd, and 4th quartiles), birth season (spring, summer, autumn, and winter), parity (1 and  $\geq 2$ ), maternal mental illness, SMM score (0, 1, and  $\geq 2$ ), and hospital outpatient visit (0, 1, and  $\geq 2$ ), and admission contact (0, 1, and  $\geq 2$ ) in a year before pregnancy.

†† The fully adjusted model was adjusted for the following variables: covariates as in the adjusted model, history of maternal neuropsychiatric conditions (alcohol or drug misuse, mood disorders except those with psychotic symptoms, anxiety and stress-related disorders, sleep disorders, epilepsy, and other neuropsychiatry disorders), and use of NSAID and acetaminophen during pregnancy.

Numbers in bold indicate significant differences ( $P < 0.05$ )

**Supplement data 5.** Crude and adjusted hazard ratio models of the association between opioid exposure during pregnancy and neuropsychiatric disorders in children with the sibling comparison cohort from full unmatched cohort, PS-matched cohort A, and child screening cohort from 2010 to 2017

|                                                                                     | n (%)          | Neuropsychiatric disorder events (%) | Person-years | Neuropsychiatric incidence rate* | Hazard ratio (95% CI)      |                     |                     |
|-------------------------------------------------------------------------------------|----------------|--------------------------------------|--------------|----------------------------------|----------------------------|---------------------|---------------------|
|                                                                                     |                |                                      |              |                                  | Crude                      | Adjusted†           | Fully adjusted††    |
| Opioid exposure during pregnancy (Sibling cohort A from the full unmatched cohort)  |                |                                      |              |                                  |                            |                     |                     |
| No                                                                                  | 114,007 (52.0) | 5,008 (4.4)                          | 760,040      | 6.6                              | 1 (reference)              | 1 (reference)       | 1 (reference)       |
| Yes                                                                                 | 105,339 (48.0) | 2,754 (2.6)                          | 566,329      | 4.9                              | <b>0.78 (0.73 to 0.82)</b> | 1.00 (0.93 to 1.07) | 1.00 (0.93 to 1.07) |
| Opioid exposure during pregnancy (Sibling cohort B from the PS-matched cohort A)    |                |                                      |              |                                  |                            |                     |                     |
| No                                                                                  | 42,646 (50.7)  | 1,814 (4.3)                          | 264,230      | 6.9                              | 1 (reference)              | 1 (reference)       | 1 (reference)       |
| Yes                                                                                 | 41,420 (49.3)  | 1,307 (3.2)                          | 228,421      | 5.7                              | <b>0.90 (0.82 to 0.99)</b> | 1.01 (0.91 to 1.12) | 1.01 (0.91 to 1.12) |
| Opioid exposure during pregnancy (Sibling cohort C from the child screening cohort) |                |                                      |              |                                  |                            |                     |                     |
| No                                                                                  | 21,221 (50.6)  | 1,066 (5.0)                          | 152,981      | 7.0                              | 1 (reference)              | 1 (reference)       | 1 (reference)       |
| Yes                                                                                 | 20,699 (49.4)  | 585 (2.8)                            | 121,848      | 4.8                              | <b>0.72 (0.63 to 0.80)</b> | 0.95 (0.82 to 1.12) | 0.95 (0.81 to 1.11) |

CI, confidence interval; MME, morphine milligram equivalents; PS, propensity score; SMM, severe maternal morbidity

\* Neuropsychiatric incidence rate is expressed per 1,000 person-years

† The adjusted model was adjusted for the following variables: maternal age at delivery years ( $\leq 19$ , 20-24, 25-29, 30-34, and  $\geq 35$  years), infant sex, region of residence (urban and rural), household income level (1st, 2nd, 3rd, and 4th quartiles), birth season (spring, summer, autumn, and winter), parity (1 and  $\geq 2$ ), maternal mental illness, SMM score (0, 1, and  $\geq 2$ ), and hospital outpatient visit (0, 1, and  $\geq 2$ ), and admission contact (0, 1, and  $\geq 2$ ) in a year before pregnancy.

†† The fully adjusted model was adjusted for the following variables: covariates as in the adjusted model, history of maternal neuropsychiatric conditions (alcohol or drug misuse, mood disorders except those with psychotic symptoms, anxiety and stress-related disorders, sleep disorders, epilepsy, and other neuropsychiatry disorders), and use of NSAID and acetaminophen during pregnancy.

Numbers in bold indicate significant differences ( $P < 0.05$ )



**Supplement data 6.** Baseline characteristics of study subjects (PS-matched cohort B, birth date of infants in 2010-2015)

|                                          | Full unmatched cohort (n=2,264,056)    |                                    | PS-matched cohort B (n=877,470) <sup>a</sup> |                                    | SMD*  |
|------------------------------------------|----------------------------------------|------------------------------------|----------------------------------------------|------------------------------------|-------|
|                                          | Children with prenatal opioid exposure | Children without prenatal exposure | Children with prenatal opioid exposure       | Children without prenatal exposure |       |
| <b>Total, n</b>                          | 146,858                                | 2,117,198                          | 146,788                                      | 730,682                            |       |
| <b>Maternal characteristics</b>          |                                        |                                    |                                              |                                    |       |
| Maternal age at delivery year, mean (SD) | 32.0 (4.1)                             | 31.7 (4.1)                         | 32.0 (4.1)                                   | 32.0 (4.1)                         | <0.01 |
| Maternal age at delivery year, n (%)     |                                        |                                    |                                              |                                    | <0.01 |
| ≤ 19                                     | 379 (0.3)                              | 5,797 (0.3)                        | 377 (0.3)                                    | 1,616 (0.2)                        |       |
| 20-24                                    | 5,802 (4.0)                            | 96,272 (4.6)                       | 5,797 (4.0)                                  | 28,011 (3.8)                       |       |
| 25-29                                    | 29,773 (20.3)                          | 483,644 (22.8)                     | 29,766 (20.3)                                | 147,198 (20.2)                     |       |
| 30-34                                    | 73,035 (49.7)                          | 1,044,582 (49.3)                   | 73,009 (49.7)                                | 364,742 (49.9)                     |       |
| ≥ 35                                     | 37,869 (25.8)                          | 486,903 (23.0)                     | 37,839 (25.8)                                | 189,115 (25.9)                     |       |
| Region of residence, n (%)               |                                        |                                    |                                              |                                    | <0.01 |
| Rural                                    | 60,859 (41.4)                          | 920,131 (43.5)                     | 60,840 (41.5)                                | 302,824 (41.4)                     |       |
| Urban                                    | 85,999 (58.6)                          | 1,197,067 (56.5)                   | 85,948 (58.6)                                | 427,858 (58.6)                     |       |
| Income level, n (%)                      |                                        |                                    |                                              |                                    | <0.01 |
| 1st quartile                             | 34,981 (23.8)                          | 476,057 (22.5)                     | 34,943 (23.8)                                | 173,439 (23.7)                     |       |
| 2nd quartile                             | 38,672 (26.3)                          | 551,432 (26.1)                     | 38,657 (26.3)                                | 192,377 (26.3)                     |       |
| 3rd quartile                             | 36,509 (24.9)                          | 530,381 (25.1)                     | 36,496 (24.9)                                | 181,773 (24.9)                     |       |
| 4th quartile                             | 36,696 (25.0)                          | 559,328 (26.4)                     | 36,692 (25.0)                                | 183,093 (25.1)                     |       |
| Parity, n (%)                            |                                        |                                    |                                              |                                    | <0.01 |
| 1                                        | 124,459 (84.8)                         | 1,643,964 (77.7)                   | 124,390 (84.7)                               | 621,060 (85.0)                     |       |
| ≥ 2                                      | 22,399 (15.3)                          | 473,234 (22.4)                     | 22,398 (15.3)                                | 109,622 (15.0)                     |       |

|                                                                 |                |                  |                |                |       |
|-----------------------------------------------------------------|----------------|------------------|----------------|----------------|-------|
| Maternal medical conditions, n (%)                              |                |                  |                |                | 0.06  |
| No mental illness                                               | 113,537 (77.3) | 1,789,943 (84.5) | 113,536 (77.4) | 568,946 (77.9) |       |
| Common                                                          | 29,840 (20.3)  | 296,659 (14.0)   | 29,794 (20.3)  | 145,951 (20.0) |       |
| Severe                                                          | 3,481 (2.4)    | 30,596 (1.5)     | 3,458 (2.4)    | 15,785 (2.2)   |       |
| Severe maternal morbidity, n (%)                                |                |                  |                |                | <0.01 |
| 0                                                               | 134,654 (91.7) | 1,986,819 (93.8) | 134,645 (91.7) | 673,133 (92.1) |       |
| 1                                                               | 11,724 (8.0)   | 126,887 (6.0)    | 11,690 (8.0)   | 55,897 (7.7)   |       |
| ≥ 2                                                             | 480 (0.3)      | 3,492 (0.2)      | 453 (0.3)      | 1,652 (0.2)    |       |
| Delivery type, n (%)                                            |                |                  |                |                | <0.01 |
| Vaginal delivery                                                | 81,215 (55.3)  | 1,275,479 (60.2) | 81,212 (55.3)  | 405,785 (55.5) |       |
| Cesarean section                                                | 65,643 (44.7)  | 841,719 (39.8)   | 65,576 (44.7)  | 324,897 (44.5) |       |
| Number of hospital admissions in a year before pregnancy, n (%) |                |                  |                |                | <0.01 |
| 0                                                               | 118,207 (80.5) | 1,808,567 (85.4) | 118,195 (80.5) | 590,433 (80.8) |       |
| 1                                                               | 23,027 (15.7)  | 260,020 (12.3)   | 23,016 (15.7)  | 114,543 (15.7) |       |
| ≥ 2                                                             | 5,624 (3.8)    | 48,611 (2.3)     | 5,577 (3.8)    | 25,706 (3.5)   |       |
| Number of outpatient contacts in a year before pregnancy, n (%) |                |                  |                |                | <0.01 |
| 0                                                               | 3,337 (2.3)    | 144,636 (6.8)    | 3,336 (2.3)    | 16,570 (2.3)   |       |
| 1                                                               | 3,622 (2.5)    | 125,198 (5.9)    | 3,622 (2.5)    | 18,006 (2.5)   |       |
| ≥ 2                                                             | 139,899 (95.3) | 1,847,364 (87.3) | 139,830 (95.3) | 696,106 (95.3) |       |
| <b>Infant characteristics</b>                                   |                |                  |                |                |       |
| Infant sex, n (%)                                               |                |                  |                |                | <0.01 |
| Male                                                            | 75,203 (51.2)  | 1,087,053 (51.3) | 75,166 (51.2)  | 374,258 (51.2) |       |

|                                                            |                |                  |                |                |       |
|------------------------------------------------------------|----------------|------------------|----------------|----------------|-------|
| Female                                                     | 71,655 (48.8)  | 1,030,145 (48.7) | 71,622 (48.8)  | 356,424 (48.8) |       |
| Birth season, n (%)                                        |                |                  |                |                | 0.02  |
| Spring                                                     | 35,866 (24.4)  | 545,587 (25.8)   | 35,858 (24.4)  | 179,102 (24.5) |       |
| Summer                                                     | 39,916 (27.2)  | 513,192 (24.2)   | 39,880 (27.2)  | 197,457 (27.0) |       |
| Autumn                                                     | 35,515 (24.2)  | 529,822 (25.0)   | 35,498 (24.2)  | 177,023 (24.2) |       |
| Winter                                                     | 35,561 (24.2)  | 528,597 (25.0)   | 35,552 (24.2)  | 177,100 (24.2) |       |
| Year of delivery, n (%)                                    |                |                  |                |                | <0.01 |
| 2010 to 2012                                               | 69,885 (47.6)  | 1,119,845 (52.9) | 69,871 (47.6)  | 347,759 (47.6) |       |
| 2013 to 2015                                               | 76,973 (52.4)  | 997,353 (47.1)   | 76,917 (52.4)  | 382,923 (52.4) |       |
| At-risk newborn, n (%)                                     |                |                  |                |                |       |
| Preterm birth                                              | 6,727 (4.6)    | 68,824 (3.3)     | 6,685 (4.6)    | 29,560 (4.1)   | 0.02  |
| Low birth weight                                           | 4,976 (3.4)    | 55,422 (2.6)     | 4,948 (3.4)    | 21,380 (2.9)   | 0.02  |
| <b>Unmatching variables (maternal parameters)</b>          |                |                  |                |                |       |
| Alcohol or drug misuse, n (%)                              | 294 (0.2)      | 2,194 (0.1)      | 289 (0.2)      | 1,405 (0.2)    |       |
| Mood disorders except those with psychotic symptoms, n (%) | 5,208 (3.6)    | 42,490 (2.0)     | 5,181 (3.5)    | 26,869 (3.7)   |       |
| Anxiety and stress-related disorders, n (%)                | 9,160 (6.2)    | 76,743 (3.6)     | 9,129 (6.2)    | 48,704 (6.7)   |       |
| Sleep disorders, n (%)                                     | 506 (0.3)      | 5,451 (0.3)      | 499 (0.3)      | 2,475 (0.3)    |       |
| Epilepsy, n (%)                                            | 384 (0.3)      | 3,535 (0.2)      | 383 (0.3)      | 2,042 (0.3)    |       |
| Other neuropsychiatry disorders, n (%)                     | 4,467 (3.0)    | 32,980 (1.6)     | 4,445 (3.0)    | 17,053 (2.3)   |       |
| Use of NSAID during pregnancy, n (%)                       | 71,593 (48.8)  | 347,854 (16.4)   | 71,538 (48.7)  | 162,775 (22.3) |       |
| Use of acetaminophen during pregnancy, n (%)               | 124,822 (85.0) | 695,710 (32.9)   | 124,755 (85.0) | 342,618 (46.9) |       |

NSAID, nonsteroidal anti-inflammatory drug; PS, propensity score; SD, standard deviation; SMD, standardized mean difference

<sup>a</sup> PS-matched cohort B consists of infants born between 2010 and 2015, with the exposed and unexposed groups matched in a 1:5 ratio (Cohort 4 in Figure 1 and Table S8).

\* SMD <0.1 corresponds to no major imbalance

**Supplement data 7.** Interaction analysis of opioid prescriptions in a year before pregnancy and opioid prescriptions during pregnancy

|                                                                                                   | n (%)          | Neuropsychiatric disorder events (%) | Person-years | Neuropsychiatric incidence rate* | Hazard ratio (95% CI)      |                            |                            |
|---------------------------------------------------------------------------------------------------|----------------|--------------------------------------|--------------|----------------------------------|----------------------------|----------------------------|----------------------------|
|                                                                                                   |                |                                      |              |                                  | Crude                      | Adjusted†                  | Fully adjusted††           |
| Opioid prescriptions in a year before pregnancy X Opioid prescriptions during pregnancy (p-value) |                |                                      |              |                                  | p=0.001                    | P=0.003                    | P=0.036                    |
| <b>PS-matched cohort A</b>                                                                        |                |                                      |              |                                  |                            |                            |                            |
| Opioid prescriptions in a year before pregnancy                                                   |                |                                      |              |                                  |                            |                            |                            |
| No                                                                                                | 537,101 (41.9) | 1,953 (3.3)                          | 354,819      | 5.5                              | 1.02 (0.98 to 1.07)        | 1.02 (0.98 to 1.07)        | 1.02 (0.98 to 1.07)        |
| Yes                                                                                               | 752,339 (58.1) | 5,451 (3.5)                          | 917,389      | 5.9                              | <b>1.09 (1.06 to 1.13)</b> | <b>1.09 (1.06 to 1.12)</b> | <b>1.08 (1.05 to 1.11)</b> |
| <b>Child screening cohort</b>                                                                     |                |                                      |              |                                  |                            |                            |                            |
| Opioid prescriptions in a year before pregnancy                                                   |                |                                      |              |                                  |                            |                            |                            |
| No                                                                                                | 655,754 (48.1) | 827 (3.3)                            | 154,111      | 5.4                              | 1.01 (0.95 to 1.09)        | 1.03 (0.96 to 1.11)        | 1.02 (0.95 to 1.10)        |
| Yes                                                                                               | 706,765 (51.9) | 2,269 (3.3)                          | 396,326      | 5.7                              | <b>1.06 (1.02 to 1.11)</b> | <b>1.09 (1.04 to 1.14)</b> | <b>1.06 (1.02 to 1.11)</b> |

CI, confidence interval; PS, propensity score; SMM, severe maternal morbidity

\* Neuropsychiatric incidence rate is expressed per 1,000 person-years

† The adjusted model was adjusted for the following variables: maternal age at delivery years ( $\leq 19$ , 20-24, 25-29, 30-34, and  $\geq 35$  years),

infant sex, region of residence (urban and rural), household income level (1st, 2nd, 3rd, and 4th quartiles), birth season (spring, summer,

autumn, and winter), parity (1 and  $\geq 2$ ), maternal mental illness, SMM score (0, 1, and  $\geq 2$ ), and hospital outpatient visit (0, 1, and  $\geq 2$ ), and admission contact (0, 1, and  $\geq 2$ ) in a year before pregnancy.

†† The fully adjusted model was adjusted for the following variables: covariates as in the adjusted model, history of maternal neuropsychiatric conditions (alcohol or drug misuse, mood disorders except those with psychotic symptoms, anxiety and stress-related disorders, sleep disorders, epilepsy, and other neuropsychiatry disorders), and use of NSAID and acetaminophen during pregnancy.

Numbers in bold indicate significant differences ( $P < 0.05$ )

**Supplement data 8.** Interaction analysis and ratio of hazard ratio of delivery type and opioid prescriptions during pregnancy in PS-matched cohort A

|                                                                 | <b>Hazard ratio (95% CI)</b>  |                               |                               |
|-----------------------------------------------------------------|-------------------------------|-------------------------------|-------------------------------|
|                                                                 | <b>Crude</b>                  | <b>Adjusted†</b>              | <b>Fully adjusted††</b>       |
| Delivery type X Opioid prescriptions during pregnancy (p-value) | P=0.002                       | P=0.003                       | P=0.009                       |
| Delivery type                                                   |                               |                               |                               |
| Vaginal delivery                                                | <b>1.037 (1.001 to 1.074)</b> | 1.035 (1.000 to 1.073)        | 1.030 (0.994 to 1.067)        |
| Cesarean section                                                | <b>1.121 (1.082 to 1.162)</b> | <b>1.117 (1.077 to 1.157)</b> | <b>1.101 (1.062 to 1.141)</b> |
| Ratio of hazard ratio (Cesarean section vs. Vaginal delivery)   | <b>1.081 (1.028 to 1.137)</b> | <b>1.079 (1.026 to 1.135)</b> | <b>1.069 (1.016 to 1.124)</b> |

CI, confidence interval; PS, propensity score

PS-matched cohort A, derived from the full unmatched cohort, involves a 1:5 matching ratio and pairs the exposed and unexposed groups in a 1:5 ratio using PS (Cohort 2 in Figure 1 and Table S8).

† The adjusted model was adjusted for the following variables: maternal age at delivery years ( $\leq 19$ , 20-24, 25-29, 30-34, and  $\geq 35$  years), infant sex, region of residence (urban and rural), household income level (1st, 2nd, 3rd, and 4th quartiles), birth season (spring, summer, autumn, and winter), parity (1 and  $\geq 2$ ), maternal mental illness, SMM score (0, 1, and  $\geq 2$ ), and hospital outpatient visit (0, 1, and  $\geq 2$ ), and admission contact (0, 1, and  $\geq 2$ ) in a year before pregnancy.

†† The fully adjusted model was adjusted for the following variables: covariates as in the adjusted model, history of maternal neuropsychiatric conditions (alcohol or drug misuse, mood disorders except those with psychotic symptoms, anxiety and stress-related disorders, sleep disorders, epilepsy, and other neuropsychiatry disorders), and use of NSAID and acetaminophen during pregnancy.

Numbers in bold indicate significant differences ( $P < 0.05$ )



**Supplement data 9.** Hazard ratio models of the association between prenatal opioid exposure during pregnancy and neuropsychiatric disorders in children with the 1:5 PS-matched cohort B (birth date of infants in 2010-2015)

|                                  | n (%)          | Neuropsychiatric disorder events (%) | Person-years | Neuropsychiatric incidence rate* | Hazard ratio (95% CI)      |                            |                            |
|----------------------------------|----------------|--------------------------------------|--------------|----------------------------------|----------------------------|----------------------------|----------------------------|
|                                  |                |                                      |              |                                  | Crude                      | Adjusted†                  | Fully adjusted††           |
| Opioid exposure during pregnancy |                |                                      |              |                                  |                            |                            |                            |
| No                               | 730,682 (83.3) | 30,912 (4.2)                         | 5,309,582    | 5.8                              | 1 (reference)              | 1 (reference)              | 1 (reference)              |
| Yes                              | 146,788 (16.7) | 6,612 (4.5)                          | 1,060,222    | 6.2                              | <b>1.07 (1.04 to 1.10)</b> | <b>1.07 (1.04 to 1.10)</b> | <b>1.07 (1.04 to 1.10)</b> |
| Timing of opioid exposure        |                |                                      |              |                                  |                            |                            |                            |
| No opioid exposure               | 730,682 (83.3) | 30,912 (4.2)                         | 5,309,582    | 5.8                              | 1 (reference)              | 1 (reference)              | 1 (reference)              |
| First trimester only             | 61,797 (7.0)   | 2,984 (4.8)                          | 454,456      | 6.6                              | <b>1.13 (1.09 to 1.17)</b> | <b>1.09 (1.05 to 1.13)</b> | <b>1.09 (1.05 to 1.13)</b> |
| Second trimester only            | 33,559 (3.8)   | 1,414 (4.2)                          | 238,266      | 5.9                              | 1.02 (0.97 to 1.08)        | 1.03 (0.98 to 1.09)        | 1.03 (0.98 to 1.09)        |
| Third trimester only             | 40,706 (4.6)   | 1,664 (4.1)                          | 291,778      | 5.7                              | 0.97 (0.93 to 1.02)        | 1.01 (0.96 to 1.06)        | 1.02 (0.97 to 1.07)        |
| More than one trimester          | 10,726 (1.2)   | 550 (5.1)                            | 75,722       | 7.3                              | <b>1.25 (1.15 to 1.36)</b> | <b>1.28 (1.17 to 1.39)</b> | <b>1.23 (1.13 to 1.34)</b> |
| Dose-dependent association, MME  |                |                                      |              |                                  |                            |                            |                            |
| None                             | 730,682 (83.3) | 30,912 (4.2)                         | 5,309,582    | 5.8                              | 1 (reference)              | 1 (reference)              | 1 (reference)              |
| Low-dose user                    | 120,786 (13.8) | 5,209 (4.3)                          | 868,809      | 6.0                              | 1.03 (1.00 to 1.06)        | <b>1.04 (1.01 to 1.07)</b> | <b>1.04 (1.01 to 1.07)</b> |
| High-dose user                   | 26,002 (3.0)   | 1,403 (5.4)                          | 191,413      | 7.3                              | <b>1.26 (1.19 to 1.33)</b> | <b>1.21 (1.15 to 1.28)</b> | <b>1.18 (1.12 to 1.25)</b> |
| Opioid prescriptions, days       |                |                                      |              |                                  |                            |                            |                            |
| 0                                | 730,682 (83.3) | 30,912 (4.2)                         | 5,309,582    | 5.8                              | 1 (reference)              | 1 (reference)              | 1 (reference)              |
| 1-29                             | 144,926 (16.5) | 6,493 (4.5)                          | 1,047,370    | 6.2                              | <b>1.07 (1.04 to 1.10)</b> | <b>1.06 (1.03 to 1.09)</b> | <b>1.06 (1.03 to 1.09)</b> |
| 30-59                            | 1,701 (0.2)    | 100 (5.9)                            | 11,778       | 8.5                              | <b>1.47 (1.21 to 1.79)</b> | <b>1.49 (1.23 to 1.81)</b> | <b>1.40 (1.15 to 1.70)</b> |
| ≥60                              | 161 (0.0)      | 19 (11.8)                            | 1,074        | 17.7                             | <b>3.13 (2.00 to 4.91)</b> | <b>3.02 (1.93 to 4.74)</b> | <b>2.34 (1.49 to 3.66)</b> |

| Number of opioid prescriptions |                |              |           |     |                            |                            |                            |
|--------------------------------|----------------|--------------|-----------|-----|----------------------------|----------------------------|----------------------------|
| 0-1                            | 730,682 (83.3) | 30,912 (4.2) | 5,309,582 | 5.8 | 1 (reference)              | 1 (reference)              | 1 (reference)              |
| 2                              | 72,369 (8.3)   | 3,108 (4.3)  | 526,657   | 5.9 | 1.01 (0.98 to 1.05)        | 1.00 (0.97 to 1.04)        | 1.01 (0.97 to 1.05)        |
| ≥ 3                            | 74,419 (8.5)   | 3,504 (4.7)  | 533,565   | 6.6 | <b>1.13 (1.09 to 1.17)</b> | <b>1.14 (1.10 to 1.18)</b> | <b>1.13 (1.09 to 1.17)</b> |

CI, confidence interval; MME, morphine milligram equivalent; PS, propensity-score; SMM, severe maternal morbidity

\* Neuropsychiatric incidence rate is expressed per 1,000 person-years

† The adjusted model was adjusted for the following variables: maternal age at delivery years ( $\leq 19$ , 20-24, 25-29, 30-34, and  $\geq 35$  years), infant sex, region of residence (urban and rural), household income level (1st, 2nd, 3rd, and 4th quartiles), birth season (spring, summer, autumn, and winter), parity (1 and  $\geq 2$ ), maternal mental illness, SMM score (0, 1, and  $\geq 2$ ), and hospital outpatient visit (0, 1, and  $\geq 2$ ), and admission contact (0, 1, and  $\geq 2$ ) in a year before pregnancy.

†† The fully adjusted model was adjusted for the following variables: covariates as in the adjusted model, history of maternal neuropsychiatric conditions (alcohol or drug misuse, mood disorders except those with psychotic symptoms, anxiety and stress-related disorders, sleep disorders, epilepsy, and other neuropsychiatry disorders), and use of NSAID and acetaminophen during pregnancy.

Numbers in bold indicate significant differences ( $P < 0.05$ )

**Supplement data 10.** Hazard ratio models of the association between prenatal opioid exposure during pregnancy and neuropsychiatric disorders in children with the 1:5 PS-matched cohort C from 2010 to 2017 ('outcome' criteria with above 1 diagnosis)

|                                  | n (%)            | Neuropsychiatric disorder events (%) | Person-years | Neuropsychiatric incidence rate* | Hazard ratio (95% CI)      |                            |                            |
|----------------------------------|------------------|--------------------------------------|--------------|----------------------------------|----------------------------|----------------------------|----------------------------|
|                                  |                  |                                      |              |                                  | Crude                      | Adjusted†                  | Fully adjusted††           |
| Opioid exposure during pregnancy |                  |                                      |              |                                  |                            |                            |                            |
| No                               | 1,073,510 (83.3) | 60,742 (5.7)                         | 5,225,294    | 11.6                             | 1 (reference)              | 1 (reference)              | 1 (reference)              |
| Yes                              | 215,930 (16.8)   | 12,841 (6.0)                         | 1,043,673    | 12.3                             | <b>1.06 (1.04 to 1.08)</b> | <b>1.06 (1.04 to 1.08)</b> | <b>1.05 (1.03 to 1.07)</b> |
| Timing of opioid exposure        |                  |                                      |              |                                  |                            |                            |                            |
| No opioid exposure               | 1,073,510 (83.3) | 60,742 (5.7)                         | 5,225,294    | 11.6                             | 1 (reference)              | 1 (reference)              | 1 (reference)              |
| First trimester only             | 87,555 (6.8)     | 5,651 (6.5)                          | 446,948      | 12.6                             | <b>1.12 (1.09 to 1.15)</b> | <b>1.09 (1.06 to 1.12)</b> | <b>1.08 (1.05 to 1.11)</b> |
| Second trimester only            | 50,764 (3.9)     | 2,900 (5.7)                          | 234,557      | 12.4                             | <b>1.04 (1.01 to 1.08)</b> | <b>1.05 (1.01 to 1.09)</b> | <b>1.04 (1.01 to 1.08)</b> |
| Third trimester only             | 61,117 (4.7)     | 3,296 (5.4)                          | 287,529      | 11.5                             | 0.97 (0.94 to 1.01)        | 0.99 (0.96 to 1.03)        | 0.99 (0.96 to 1.03)        |
| More than one trimester          | 16,494 (1.3)     | 994 (6.0)                            | 74,639       | 13.3                             | <b>1.11 (1.05 to 1.18)</b> | <b>1.13 (1.06 to 1.21)</b> | <b>1.10 (1.03 to 1.17)</b> |
| Dose-dependent association, MME  |                  |                                      |              |                                  |                            |                            |                            |
| None                             | 1,073,510 (83.3) | 60,742 (5.7)                         | 5,225,294    | 11.6                             | 1 (reference)              | 1 (reference)              | 1 (reference)              |
| Low-dose user                    | 161,682 (12.5)   | 9,893 (6.1)                          | 855,514      | 11.6                             | <b>1.04 (1.02 to 1.06)</b> | <b>1.03 (1.01 to 1.06)</b> | <b>1.03 (1.01 to 1.05)</b> |
| High-dose user                   | 54,248 (4.2)     | 2,948 (5.4)                          | 188,159      | 15.7                             | <b>1.14 (1.10 to 1.18)</b> | <b>1.13 (1.09 to 1.18)</b> | <b>1.11 (1.07 to 1.15)</b> |
| Opioid prescriptions, days       |                  |                                      |              |                                  |                            |                            |                            |
| 0                                | 1,073,510 (83.3) | 60,742 (5.7)                         | 5,225,294    | 11.6                             | 1 (reference)              | 1 (reference)              | 1 (reference)              |
| 1-29                             | 212,818 (16.5)   | 12,637 (5.9)                         | 1,031,018    | 12.3                             | <b>1.06 (1.04 to 1.08)</b> | <b>1.05 (1.03 to 1.07)</b> | <b>1.05 (1.03 to 1.07)</b> |
| 30-59                            | 2,818 (0.2)      | 179 (6.4)                            | 11,601       | 15.4                             | <b>1.23 (1.06 to 1.43)</b> | <b>1.26 (1.09 to 1.46)</b> | <b>1.19 (1.02 to 1.37)</b> |
| ≥60                              | 294 (0.0)        | 25 (8.5)                             | 1,054        | 23.7                             | <b>1.81 (1.23 to 2.67)</b> | <b>1.74 (1.17 to 2.57)</b> | 1.42 (0.96 to 2.10)        |

| Number of opioid prescriptions |                  |              |           |      |                            |                            |                            |
|--------------------------------|------------------|--------------|-----------|------|----------------------------|----------------------------|----------------------------|
| 0-1                            | 1,073,510 (83.3) | 60,742 (5.7) | 5,225,294 | 11.6 | 1 (reference)              | 1 (reference)              | 1 (reference)              |
| 2                              | 104,975 (8.1)    | 6,164 (5.9)  | 518,373   | 11.9 | <b>1.03 (1.01 to 1.06)</b> | 1.02 (1.00 to 1.05)        | 1.02 (0.99 to 1.05)        |
| ≥ 3                            | 110,955 (8.6)    | 6,677 (6.0)  | 525,300   | 12.7 | <b>1.08 (1.06 to 1.11)</b> | <b>1.09 (1.06 to 1.12)</b> | <b>1.07 (1.05 to 1.10)</b> |

CI, confidence interval; MME, morphine milligram equivalent; PS, propensity-score; SMM, severe maternal morbidity

\* Neuropsychiatric incidence rate is expressed per 1,000 person-years

† The adjusted model was adjusted for the following variables: maternal age at delivery years ( $\leq 19$ , 20-24, 25-29, 30-34, and  $\geq 35$  years), infant sex, region of residence (urban and rural), household income level (1st, 2nd, 3rd, and 4th quartiles), birth season (spring, summer, autumn, and winter), parity (1 and  $\geq 2$ ), maternal mental illness, SMM score (0, 1, and  $\geq 2$ ), and hospital outpatient visit (0, 1, and  $\geq 2$ ), and admission contact (0, 1, and  $\geq 2$ ) in a year before pregnancy.

†† The fully adjusted model was adjusted for the following variables: covariates as in the adjusted model, history of maternal neuropsychiatric conditions (alcohol or drug misuse, mood disorders except those with psychotic symptoms, anxiety and stress-related disorders, sleep disorders, epilepsy, and other neuropsychiatry disorders), and use of NSAID and acetaminophen during pregnancy.

Numbers in bold indicate significant differences ( $P < 0.05$ )

**Supplement data 11.** Hazard ratio model of the association between prenatal opioid exposure during pregnancy and specific neuropsychiatric disorders in children within the 1:5 PS-matched cohort A from 2010 to 2017

|                                                         | n (%)            | Neuropsychiatric disorder events (%) | Crude hazard ratio (95% CI) |
|---------------------------------------------------------|------------------|--------------------------------------|-----------------------------|
| Alcohol or drug misuse                                  |                  |                                      |                             |
| No opioid exposure                                      | 1,073,510 (83.3) | 84 (0.0)                             | 1 (reference)               |
| Opioid exposure                                         | 215,930 (16.8)   | 15 (0.0)                             | 0.89 (0.51 to 1.54)         |
| Mood disorders, excluding those with psychotic symptoms |                  |                                      |                             |
| No opioid exposure                                      | 1,073,510 (83.3) | 2,281 (0.2)                          | 1 (reference)               |
| Opioid exposure                                         | 215,930 (16.8)   | 535 (0.3)                            | <b>1.19 (1.08 to 1.30)</b>  |
| Anxiety and stress-related disorders                    |                  |                                      |                             |
| No opioid exposure                                      | 1,073,510 (83.3) | 4,456 (0.4)                          | 1 (reference)               |
| Opioid exposure                                         | 215,930 (16.8)   | 933 (0.43)                           | 1.06 (0.99 to 1.13)         |
| Eating disorders                                        |                  |                                      |                             |
| No opioid exposure                                      | 1,073,510 (83.3) | 134 (0.0)                            | 1 (reference)               |
| Opioid exposure                                         | 215,930 (16.8)   | 21 (0.0)                             | 0.78 (0.49 to 1.24)         |
| Compulsive disorders                                    |                  |                                      |                             |
| No opioid exposure                                      | 1,073,510 (83.3) | 326 (0.0)                            | 1 (reference)               |
| Opioid exposure                                         | 215,930 (16.8)   | 56 (0.0)                             | 0.87 (0.66 to 1.16)         |
| ADHD                                                    |                  |                                      |                             |
| No opioid exposure                                      | 1,073,510 (83.3) | 11,013 (1.0)                         | 1 (reference)               |
| Opioid exposure                                         | 215,930 (16.8)   | 2,454 (1.1)                          | <b>1.13 (1.08 to 1.18)</b>  |
| ASD                                                     |                  |                                      |                             |

|                                  |                  |              |                            |
|----------------------------------|------------------|--------------|----------------------------|
| No opioid exposure               | 1,073,510 (83.3) | 5,472 (0.5)  | 1 (reference)              |
| Opioid exposure                  | 215,930 (16.8)   | 1,072 (0.5)  | 0.98 (0.92 to 1.04)        |
| Intellectual disability          |                  |              |                            |
| No opioid exposure               | 1,073,510 (83.3) | 3,399 (0.3)  | 1 (reference)              |
| Opioid exposure                  | 215,930 (16.8)   | 864 (0.4)    | <b>1.27 (1.18 to 1.37)</b> |
| Common neuropsychiatric disorder |                  |              |                            |
| No opioid exposure               | 1,073,510 (83.3) | 33,282 (3.1) | 1 (reference)              |
| Opioid exposure                  | 215,930 (16.8)   | 7,077 (3.3)  | <b>1.07 (1.04 to 1.10)</b> |
| Severe neuropsychiatric disorder |                  |              |                            |
| No opioid exposure               | 1,073,510 (83.3) | 1,217 (0.1)  | 1 (reference)              |
| Opioid exposure                  | 215,930 (16.8)   | 319 (0.2)    | <b>1.32 (1.17 to 1.49)</b> |

ADHD, attention-deficit hyperactivity disorder; ASD, autism spectrum disorder; CI, confidence interval; PS, propensity score

Numbers in bold indicate significant differences ( $P < 0.05$ )
